# Supplementary material for: Three-dimensional facial development of children with unilateral cleft lip and palate during the first year of life in comparison with normative average faces
Source: PeerJ. 2019 Jul 30;7:e7302. doi: 10.7717/peerj.7302 (PMC6677122; doi:10.7717/peerj.7302)
Supplement: Supplemental Information 1 [file peerj-07-7302-s001.xlsx]

## Sheet: Legend
Tab page number file Results_uclp	ID	Age (mnd)
1	A	3
3	A	6
10	A	9
45	B	3
50	B	6
52	B	9
55	B	12
44	C	3
48	C	6
54	C	12
40	D	3
43	D	6
47	D	9
51	D	12
2	E	3
7	E	6
14	E	9
15	F	3
26	F	6
35	F	9
58	H	6
63	H	12
65	I	6
66	I	9
67	I	12
56	J	6
59	J	9
60	J	12
11	K	3
20	K	6
33	K	9
42	L	3
46	L	6
49	L	9
53	L	12
21	M	3
31	M	6
38	M	9
8	N	3
22	N	6
28	N	9
57	O	6
62	O	12
6	Q	3
18	Q	6
27	Q	9
9	R	3
19	R	6
29	R	9
39	S	6
41	S	9
61	T	6
64	T	12
4	U	3
12	U	6
24	U	9
32	U	12
16	V	6
25	V	9
36	V	12

## Sheet: Blad1
	mean	std	95low	95up	surface		face	forehead	nose	cheeks	upper lip	chin
face	0.0915752	5.36324	-7.55571	8.50279	15364		7.5908	-5.48017	2.84195	8.86374	-1.24432	-4.75355
forehead	-1.45274	5.03013	-7.98806	7.59202	3395		-7.27101	-5.58512	3.16874	8.71546	-1.60788	-5.05545
nose	0.772497	2.08483	-2.6884	3.19538	767		-6.92862	-5.76863	3.23864	8.93703	-1.27199	-5.44833
cheeks	0.139552	5.68918	-7.74194	8.11904	4276		8.00274	-5.77404	2.53693	8.46321	-2.14374	-4.38193
upper lip	-1.59626	3.35137	-8.58915	2.60823	592		7.51074	-5.78926	3.33914	8.91496	-1.58215	-3.95094
chin	1.40049	3.95454	-4.86851	5.54433	739		-6.52465	-5.97676	3.31522	8.85379	-2.30899	-3.44206
							7.81692	-6.07646	3.53996	8.83932	-1.85973	-4.67469
							8.26331	-5.95814	3.03045	8.72491	-0.987718	-3.11634
							8.05497	-6.42754	2.38126	8.51392	-0.931491	-5.37519
							-6.13989	-6.09789	3.6608	-8.13615	-1.80692	-3.60307
							-7.41563	-6.09288	3.02443	8.90288	-1.25412	-2.96261
							8.50044	-6.81108	2.62691	8.85297	-2.43224	-2.86852
							7.85667	-6.0636	3.19462	8.67924	-2.11737	-4.39961
							8.13202	-6.44582	2.40514	8.689	-2.07789	-3.07513
							8.58096	-6.12406	3.61045	8.83406	-0.471676	-5.3346
							7.95063	-7.15201	2.31743	8.85704	-1.31658	-3.23611
							8.43768	-6.12507	2.5711	8.47248	2.34555	-2.61919
							8.55059	-7.10349	2.76124	-8.15199	-1.7337	-3.19716
							-5.97452	-6.44305	2.59625	8.72127	-0.597919	-2.63812
							-6.6185	-7.43922	2.83742	-8.48707	0.911767	-5.34522
							8.36355	-6.81101	3.09294	-7.94798	-1.57037	-4.86426
							8.74419	-6.12735	3.20216	8.84346	2.84195	-3.43934
							8.47904	-6.09408	3.3844	-7.74738	2.0314	-2.56152
							8.77228	-6.06465	1.97734	-8.62563	1.37595	-3.45606
							7.74617	-6.24594	2.42656	8.76809	0.922655	-2.88949
							-7.79745	-7.12716	2.39343	8.44353	0.251621	-2.35196
							-7.29832	-7.68651	2.67153	-8.05523	-0.794107	-5.39871
							8.83569	-7.61708	3.15935	-8.74492	2.53693	-3.82777
							-8.1167	-6.47433	3.03111	-8.27498	1.78372	-3.27291
							8.5945	-6.20206	3.11659	-8.21148	1.80193	-2.51788
							8.79089	-6.8119	1.45714	-7.80836	2.38126	-3.32921
							-5.83308	-6.11245	2.59276	-8.63198	1.62577	-2.15607
							8.86374	-7.39576	3.12971	8.6798	0.348308	-3.12705
							8.41416	-7.89435	2.80432	8.55516	2.30256	-2.15831
							8.71546	-5.93391	1.75812	-8.72205	1.06127	-4.94923
							-6.46895	-6.02893	2.52178	-8.39212	2.18743	-4.26345
							8.93703	-6.10073	3.16386	-7.62113	2.40514	-2.57206
							7.67278	-6.24901	0.763179	-8.00817	1.86413	-2.05917
							-6.9655	-6.55294	3.16727	-8.62703	2.632	-3.38215
							-8.2095	-7.7065	2.21644	-8.04979	0.469461	-2.19688
							-7.65986	-7.32823	2.99109	-8.50236	1.13572	-3.34544
							8.76282	-8.01918	2.66677	-8.60934	2.39343	-1.81579
							8.46321	-8.11004	3.23495	-7.31834	2.50949	-4.34327
							8.91496	-5.99046	3.15135	-7.68638	1.68171	4.19656
							-7.9272	-8.02152	1.17448	-8.22692	2.90473	-4.81954
							8.17717	-6.94987	0.645074	-8.31053	0.218095	3.51807
							-6.67541	-5.78627	1.80495	8.34002	2.53248	-2.68923
							8.85379	-5.86722	2.81379	-7.68073	0.73241	-1.81916
							-7.33585	-6.33575	2.46407	-8.06494	3.16727	4.79581
							8.55692	-7.89769	-0.985343	-8.53068	1.63036	-1.85415
							-5.69087	-7.55101	3.16778	-7.66474	2.72193	-3.81011
							7.86488	-6.03216	-1.18378	-8.43663	-0.762221	4.42666
							8.83932	-8.08324	3.02228	-8.47019	2.87432	5.19167
							8.72491	-6.80657	3.06513	-7.22784	1.62277	3.90727
							8.1587	-7.16751	2.87432	-7.62766	0.919073	3.36639
							7.41461	-6.23377	2.98147	-7.26515	0.550234	2.06715
							8.51392	-5.611	2.08348	-8.17575	1.94066	4.55046
							-8.13615	-8.25048	2.66431	-7.78601	-5.19872	-2.01477
							-7.69425	-6.42324	0.927035	-7.76424	2.50219	4.98095
							-7.93597	-7.78488	3.17553	-8.00381	-2.17324	-3.34567
							8.90288	-8.05602	0.669509	-8.08219	1.36939	3.35855
							8.85297	-8.22217	3.10842	-8.34176	0.950813	5.45412
							7.73726	-5.70183	0.471852	-8.29057	-7.61454	-2.31591
							-6.53988	-5.97389	2.70812	-8.36193	9.46656	4.17825
							8.67924	-8.07897	-0.974545	-7.29307	-7.48861	-1.90323
							8.41345	-7.46329	-1.13789	-7.28367	-7.29601	4.62877
							-6.12991	-6.12907	2.95292	-6.86123	-4.03136	2.93157
							-7.08095	-6.54834	1.42888	-7.74348	1.81972	5.62742
							8.689	-8.28123	0.690275	-8.26848	-0.79261	5.19013
							-7.72191	-6.98316	2.99595	-7.97448	-0.997751	5.12395
							-7.44024	-7.69373	2.24781	-6.88323	-1.36923	4.8464
							8.83406	-5.41989	2.50219	-8.18149	-1.25681	4.51138
							8.85704	-5.64576	0.688748	-7.08118	1.11539	4.2415
							8.47248	-8.13278	2.74279	-8.02971	-3.59426	4.07683
							-8.15199	-6.27389	2.8415	-8.06639	-1.38404	3.69158
							-7.22647	-8.306	2.94835	-7.75737	-9.85103	3.41695
							-5.57009	-6.56757	2.85276	-6.94284	1.26655	2.95827
							7.90877	-8.04172	-1.14662	-7.34599	-9.71347	2.43546
							8.72127	-5.96853	-2.68356	-8.10768	-1.32046	2.24315
							6.93275	-7.91982	-2.6385	-7.20052	-9.68162	-2.2307
							-8.48707	-7.15967	-2.75708	-6.87644	-10.5067	-2.58364
							-7.94798	-8.26841	-2.77831	-7.30708	-6.62973	-3.11609
							8.84346	-5.68979	2.59934	-8.09213	0.757986	3.39462
							-8.20836	-5.18642	2.62623	-7.7305	-8.63517	4.79111
							-7.74738	-6.65167	-2.82597	-7.63899	-3.58438	2.41002
							-5.98374	-8.21305	-2.79654	-7.85732	-9.35906	4.56803
							-7.48968	-7.48169	2.66408	-6.93209	-0.248127	2.57209
							-6.75808	-8.33321	2.71189	-7.84581	-8.83555	5.76068
							-8.62563	-8.02441	2.72646	-8.01354	-6.74812	4.06362
							7.21045	-6.27036	2.70237	-6.67194	-7.69242	-3.23482
							8.76809	-5.88258	-2.57664	-7.9342	-5.01123	5.18036
							7.86438	-7.98706	2.64088	-7.90974	-8.45108	2.6199
							8.44353	-5.29846	-2.50557	-7.08301	-6.0716	4.89108
							-7.53141	-7.62896	2.62073	-7.31938	-1.26875	3.23068
							-8.05523	-8.19167	-2.14174	-6.71292	-7.42828	4.30514
							-8.74492	-6.95852	2.49101	-6.63176	-6.72617	4.68699
							-8.27498	-5.51365	-1.87186	-6.4652	-4.39625	5.79903
							-8.21148	-7.79795	2.17333	-7.88228	-3.95816	5.04211
							-6.49637	-6.32243	1.81972	-6.4915	-1.85378	-3.44548
							-5.49855	-4.89408	-1.61986	-7.46273	-3.73295	3.04828
							-6.96137	-7.99107	1.12709	-6.75706	-2.62224	5.44778
							-7.15157	-5.08939	0.822903	-6.41115	-3.51541	3.5962
							-7.80836	-8.33767	0.525665	-7.55927	-3.05716	4.35196
							-8.63198	-7.90963	0.472154	-7.06416	-2.37485	4.83799
							8.6798	-8.15088	1.22763	-6.79131	-0.861215	5.76407
							8.55516	-6.60104	0.452538	-6.89113	-2.55543	5.29421
							-8.72205	-5.64772	0.531007	-7.22183	-2.89655	-3.67093
							7.40908	-7.0349	1.05657	-7.57859	1.0202	3.93562
							-8.39212	-8.18558	1.02482	-7.65192	-2.82587	3.49657
							6.30928	-7.51041	0.74391	-7.74997	-2.48156	3.60646
							-6.26987	-6.17101	1.35218	-7.7404	-2.22913	5.10343
							-7.62113	-8.23474	2.47752	-7.63315	-2.12551	4.32839
							-7.20133	-5.04526	-2.5502	-6.09281	-2.17358	4.69944
							-8.00817	-4.51838	-2.42316	-6.74552	0.873615	5.68748
							-5.8455	-5.54863	2.35029	-6.69594	-3.10649	3.85167
							-8.62703	-6.98611	0.48125	-6.26286	-2.1343	4.17908
							-8.04979	-7.62151	1.26655	-7.26799	-2.73943	5.11999
							-8.50236	-7.83624	-1.71628	-7.59966	-2.64435	4.54391
							-8.60934	-8.31462	-2.65839	-7.21304	-1.14331	4.01645
							-7.31834	-4.63706	1.06846	-7.52948	-1.98973	4.88573
							-7.68638	-6.3096	-0.91658	-7.48842	-2.39058	5.32766
							-8.22692	-7.81422	-2.49545	-6.15713	-3.47873	5.62201
							6.25062	-7.1249	1.5315	-7.57606	-2.76928	3.95671
							-7.18457	-5.73428	1.44379	-6.25836	-4.06331	4.66735
							-5.45376	-8.1607	-1.90345	-6.97998	-2.80729	4.46343
							6.96054	-6.41214	0.797862	-6.09656	-3.05152	5.58475
							-6.7065	-4.72085	-2.48665	-6.34661	-2.55893	5.05922
							-8.31053	-8.28869	1.25071	-5.99589	-2.11758	4.41388
							8.34002	-7.96333	-2.63405	-5.859	-2.21134	4.21534
							-7.68073	-7.7572	0.399199	-6.27921	-3.64724	4.14203
							-8.06494	-6.62428	2.58093	-6.77407	-1.88094	4.86305
							-6.86078	-5.17371	-1.11755	-6.32933	-3.10671	5.5422
							-8.53068	-8.01064	-2.39955	-7.20254	-1.95616	5.19201
							-7.66474	-8.18917	0.757986	-7.03576	-2.627	4.84478
							-6.46481	-4.0296	2.4283	-5.92678	-2.33657	4.27752
							-8.43663	-8.27753	-2.29172	-6.41764		5.50059
							-6.18201	-7.20004	1.73944	-7.3719		4.51854
							5.48705	-5.4982	-2.6071	-7.41638		5.14282
							-8.47019	-4.09127	1.61807	-7.40643		5.42005
							-7.22784	-5.99448	-1.33255	-6.77309		4.91032
							-6.73792	-6.55725	-1.87813	-7.26877		4.49983
							-7.62766	-8.23306	-0.548365	-6.54799		5.33377
							6.0962	-4.28708	1.28586	-6.30791		4.62366
							-6.85555	-7.72312	0.410408	-6.85445		5.25183
							-6.83682	-4.74335	-2.80907	-5.81588		5.14959
							-7.26515	-7.6734	-2.73195	-5.7452		5.07144
							-8.17575	-8.05701	2.46149	-5.6845		4.84826
							-7.78601	-6.63153	-2.38244	-6.79091		4.8473
							-7.76424	-4.9138	-0.837959	-7.25897		4.9668
							-8.00381	-8.26179	0.248127	-7.12353
							-5.48017	-3.50807	0.946969	-7.24381
							-5.85169	-5.40524	-2.50455	-5.85975
							-8.08219	-7.13138	-1.16703	-6.94816
							-8.34176	-8.23421	0.188396	-5.69348
							-8.29057	-8.03733	-1.78516	-5.62443
							-8.36193	-3.70554	-2.84726	-5.9289
							-7.29307	-5.6796	1.75339	-5.61319
							-6.58784	-4.15727	0.641757	-7.24759
							-6.49527	-7.60797	-2.58989	-6.37776
							-6.78019	-7.55944	-2.34137	-6.23616
							6.00623	-5.96189	-2.92921	-5.48795
							-7.28367	-6.47787	-1.10181	-6.51938
							-6.86123	-8.10375	-1.26875	-5.57976
							-7.74348	-3.28989	-0.387437	-6.78099
							-8.26848	-3.58108	0.423174	-5.46698
							-6.58088	-4.36676	-2.63434	-5.97208
							-6.09422	-6.80397	-1.59803	-6.62947
							-7.97448	-7.8949	-3.08689	-5.35575
							-5.58512	-7.80349	-2.00008	-7.04692
							-5.76863	-8.19039	-2.62366	-7.15234
							-6.88323	-8.13749	-0.393063	-6.99617
							-8.18149	-4.77673	-1.55639	-6.86269
							-7.08118	-7.40445	0.373575	-5.27304
							-8.02971	-7.27123	-2.46121	-5.4752
							-8.06639	-3.00229	-1.85378	-5.95451
							-7.75737	-5.52733	-0.592936	-5.66972
							4.56691	-6.11304	0.448016	-6.13464
							-6.57031	-3.60984	-1.82919	-6.35145
							-6.94284	-8.07565	-1.08772	-5.20094
							-7.34599	-3.18787	-0.861215	-7.1195
							-8.10768	-8.08697	0.625568	-6.21287
							-6.26665	-7.8832	-0.899105	-5.13328
							-7.20052	-7.74097	-0.852739	-7.07141
							-6.87644	-4.85867	0.880261	-5.51518
							5.04533	-3.79555	1.0202	-5.25644
							-6.37641	-7.20347	1.09835	-5.17063
							-5.77404	-6.42123	1.05708	-6.82657
							-7.30708	-2.64089	0.873615	-5.0338
							-8.09213	-4.17995		-5.13384
							-5.78926	-5.66021		-4.97299
							-7.7305	-7.65399		-5.55335
							-7.63899	-7.97754		-5.77143
							-5.97676	-3.17672		-6.66022
							-7.85732	-7.82109		-7.0447
							-6.93209	-7.12974		-6.48289
							-6.09931	-4.87076		-6.93894
							-7.84581	-7.88708		-5.86408
							-8.01354	-4.36372		-6.90512
							-6.67194	-6.49141		-6.15433
							-7.9342	-7.41723		-4.81917
							-7.90974	-3.53503		-5.14776
							-7.08301	-6.98362		-7.05837
							-6.07646	-5.70242		-5.71454
							-6.34568	-2.27897		-7.00948
							-7.31938	-7.49856		-6.67094
							5.12731	-2.98299		-4.90201
							-6.71292	-2.58187		-6.80681
							-6.63176	-3.74988		-4.90639
							-6.4652	-4.91139		-5.38831
							4.5644	-7.69733		-6.04375
							-7.88228	-7.61229		-4.65013
							-6.4915	-5.80442		-4.6746
							-5.95814	-4.05463		-6.95145
							-6.42754	-6.83752		-5.96416
							3.74028	-6.7016		-6.49987
							-7.46273	-7.38777		-4.68921
							-6.75706	-3.09009		-4.54349
							-6.09789	1.90716		-5.69216
							-6.41115	-7.28324		-4.71579
							-6.09288	-2.49161		-4.98409
							-6.35874	-6.99266		-6.8022
							-6.29755	-5.04326		-7.04418
							-7.55927	-6.32994		-6.40439
							-7.06416	-7.55333		-6.20246
							-6.27062	-6.93643		-7.04933
							-6.79131	-5.76506		-4.76594
							-6.89113	-3.12115		-6.96198
							-7.22183	-4.01767		-5.40601
							-7.57859	-4.46294		-6.2506
							-6.81108	-6.49925		-6.61321
							-7.65192	-2.44404		-4.49416
							-6.22255	-7.35983		-4.97887
							-7.74997	1.80895		-6.75439
							-7.7404	-6.37106		-5.70443
							-7.63315	-3.42194		-4.55376
							-5.58773	-6.90202		-4.36638
							-6.17381	-7.20985		-6.98696
							-6.0636	1.53093		-4.2932
							3.90402	-5.95122		-5.05313
							-6.44582	-4.88089		-4.4235
							-6.09281	-1.90557		-4.35167
							-6.12406	-6.62759		-7.06912
							-7.15201	-6.85803		-6.21702
							4.38865	-2.6295		-6.49239
							-6.12507	-7.12409		-5.31154
							-6.11818	-6.98194		-4.48259
							-6.74552	-6.05297		-4.64599
							-6.69594	-3.86677		-6.6518
							-6.26286	-6.79534		-5.91792
							-7.26799	-5.28223		-6.44749
							-7.59966	1.37801		-4.1684
							-7.21304	-2.93015		-6.90002
							-7.52948	1.16399		-7.0952
							-7.48842	-1.83782		-4.16125
							-6.15713	-6.08833		-6.95597
							-7.10349	-4.64083		-7.05015
							-7.57606	-6.46973		-6.71929
							-6.25836	-6.61173		-4.09118
							-6.07673	-6.77339		-4.20317
							-6.97998	1.31261		-4.09719
							-6.44305	-6.30424		-4.98908
							2.79368	-1.99054		-5.58284
							-7.43922	-5.36811		-6.31708
							-5.25418	-6.58721		-4.68362
							-6.81101	-5.68417		-7.10271
							-6.09656	-3.09302		-4.06043
							-6.34661	0.805361		-5.99141
							-6.12735	-4.61935		-4.2454
							-5.95517	-3.75364		-6.91067
							-5.99589	-5.90187		-6.98016
							-5.859	-1.68302		-6.55137
							-6.27921	-2.38109		-6.75
							-6.77407	-1.20136		-3.91761
							-6.32933	-6.37385		-4.03389
							-7.20254	-5.41953		-3.88987
							-6.09408	-6.07791		-5.23916
							-6.06465	-6.15441		-4.37496
							-7.03576	-5.25992		-4.71175
							-5.90535	0.563503		-3.90252
							-6.24594	-6.03818		-5.64346
							-5.92678	-5.52245		-3.84445
							-6.0284	-2.70131		-4.89149
							-6.41764	-1.62443		-7.1898
							3.17401	-5.34566		-7.06372
							-7.3719	0.56721		-3.86059
							-7.41638	-4.51931		-7.12058
							-7.12716	-1.19869		-6.9057
							-7.68651	-3.83372		-6.27027
							-7.40643	-5.53292		-6.64339
							-5.86687	-1.96419		-4.4268
							-6.77309	-3.26935		-3.70767
							3.84069	-5.90736		-3.71447
							-7.26877	-5.88872		-3.73095
							-6.54799	-4.89919		-7.17708
							-6.30791	-0.659976		-5.84658
							-7.61708	-4.81734		-4.21474
							-6.85445	-5.29662		-3.85582
							-6.47433	-5.57776		-4.0633
							-5.81588	-5.60472		-3.7833
							-6.20206	0.414875		-3.65961
							4.07129	-3.91176		-7.23725
							-5.89651	-5.03247		-4.78594
							-5.7452	-2.70747		-3.93321
							-5.6845	-2.17324		-5.21592
							-6.8119	-1.08393		-3.59238
							-6.11245	-3.24156		-4.42228
							-6.79091	-4.11061		-7.25031
							-5.78196	-1.54875		-6.93504
							2.50336	0.29187		-5.97633
							-7.39576	-5.40147		-7.14395
							-7.25897	-4.51597		-4.20561
							-7.89435	-5.08494		-3.49793
							-7.12353	-4.97987		-6.49577
							-7.24381	0.483615		-3.78266
							-5.93391	-4.40833		-4.02325
							-6.02893	-3.40152		-5.57669
							-5.85975	-4.72064		-3.44811
							-6.94816	-5.11965		-3.65533
							-5.69348	-5.24275		-6.20186
							2.66298	-0.298458		-4.63904
							-5.62443	0.44127		-3.48757
							-5.60845	-1.92309		-3.4099
							2.11757	-3.9606		-7.23077
							-5.9289	0.676617		-3.52238
							-5.61319	-2.67271		-7.28602
							-7.24759	-4.30606		-4.37342
							-6.37776	-4.81502		-3.82652
							-6.23616	0.349519		-6.68834
							-5.48795	-0.565982		-7.07648
							-6.51938	-3.38553		-5.12007
							-5.56567	-1.04364		-4.12874
							-5.57976	-4.86428		-3.99212
							-6.10073	-4.77474		-3.34592
							-6.24901	-4.01915		-3.6031
							-6.55294	-4.4341		-3.67782
							-6.78099	-4.37493		-5.47873
							-5.46698	-4.14167		-6.87185
							-7.7065	0.84788		-3.2225
							-5.59772	-0.15824		-7.27333
							-5.50096	-3.54837		-4.78909
							-5.97208	-4.4712		-3.14173
							-6.62947	-1.19528		-3.4815
							3.74064	-0.577884		-7.16159
							-7.32823	-4.50971		-4.44335
							-8.01918	-3.9104		-3.79362
							-5.35575	0.712431		-5.80773
							-7.04692	-1.78809		-4.16324
							-8.11004	-2.78746		-3.963
							-7.15234	-2.13884		-5.03293
							-5.99046	-4.24556		-6.47691
							-6.99617	-3.66434		-3.13465
							-8.02152	-1.00267		-3.27431
							-6.94987	0.617425		-3.67095
							-6.86269	0.900317		-6.03599
							-5.78627	-3.96782		-3.83258
							2.42813	-4.19784		-7.20611
							-5.27304	-0.356162		-6.97487
							-5.4752	-4.15477		-3.45313
							1.73502	-3.10053		-3.00591
							-5.58077	-3.67672		-3.8851
							-5.95451	-1.15864		-3.51359
							3.00982	-0.736662		-3.0476
							4.52347	-1.10908		-3.27304
							-5.86722	0.899044		-4.63407
							-6.33575	-3.85808		-4.27786
							-7.89769	-1.90623		-3.70254
							-5.66972	-3.67141		-3.96628
							-6.13464	-0.691212		-2.85104
							-6.35145	-3.83555		-6.03766
							-5.20094	-1.50991		-5.53428
							-7.55101	-3.2939		-7.08048
							-7.1195	-1.04937		-3.74193
							-6.21287	-3.91469		-6.40061
							2.46116	-1.27447		-3.60656
							-5.13328	-3.39319		-2.87608
							-5.26939	-3.81481		-3.02433
							-5.00881	-0.559954		-3.52414
							-7.07141	-1.36543		-2.78264
							-5.51518	-2.1469		-3.24631
							-5.25644	-0.889727		-3.92151
							-6.03216	-3.6853		-6.87151
							-5.17063	-3.35623		-4.19119
							-8.08324	-1.45064		-3.37426
							-6.82657	-2.89563		-5.62717
							-6.80657	-1.20745		-3.03302
							1.64265	-1.52132		-5.01812
							-5.0338	-1.48301		-3.66155
							-7.16751	-1.00768		-2.76551
							-5.13384	-3.15007		-4.6044
							-5.1817	-0.710048		-6.25178
							-4.97299	-0.772379		-5.85942
							-5.43388	-1.3248		-2.66396
							1.7957	-1.13036		-3.50592
							-5.55335	-3.43679		-6.54868
							-5.77143	-3.34706		-3.46482
							-6.66022	-3.28597		-3.6998
							-6.23377	-3.2688		-3.56202
							-5.611	-2.33249		-5.27655
							-8.25048	-3.33489		-2.74943
							-7.0447	-1.0742		-2.95619
							2.317	-1.63722		-3.15778
							-6.48289	-1.12322		-3.96194
							-5.27756	-3.28832		-5.90724
							-6.42324	-1.40076		-2.56583
							-5.12275	-0.998189		-3.40154
							-7.78488	-1.24797		-3.39923
							-6.93894	-2.5459		-2.50292
							-5.86408	-2.85018		-6.12566
							-8.05602	-3.13657		-3.67245
							-4.86585	-0.806398		-4.39411
							-8.22217	-1.83303		-3.36752
							-5.70183	-0.832671		-3.38573
							-6.90512	-3.03438		-5.34894
							-6.15433	-1.31214		-3.27011
							-4.81917	-1.22316		-3.9595
							4.098	-3.12349		-4.6045
							3.29669	-3.21895		-3.38511
							-5.09058	-0.772326		-2.56107
							-5.97389	-0.977718		-5.59628
							-5.14776	-2.05407		-4.86568
							-8.07897	-1.30458		-2.31529
							-7.05837	-1.30803		-3.2227
							-5.71454	-2.95853		-3.46486
							-7.46329	-2.72793		3.06626
							-7.00948	-0.949427		-3.29795
							-6.12907	-2.94065		2.81666
							-6.67094	-2.5494		-4.12407
							-4.94281	-1.4851		-3.16221
							-4.90201	-3.02551		-3.28042
							-6.54834	-1.2782		-3.20496
							3.0326	-1.19366		-4.98926
							1.77135	-1.18378		-3.61191
							-6.80681	-0.840617		-4.16912
							-4.90639	-2.77283		-3.09405
							-8.28123	-0.963623		3.14638
							-5.38831	-3.28014		-2.10561
							-6.98316	-1.23033		-2.19948
							-7.69373	-2.82522		2.56709
							-5.41989	-1.34476		-3.15038
							-6.04375	-2.13182		-4.35959
							-4.65013	-1.34422		-3.0195
							-4.6746	-2.7516		-3.11892
							-6.95145	-1.13789		-3.60833
							-5.96416	-1.65389		-3.19365
							-5.64576	-2.37801		-3.05536
							-6.49987	-0.986092		2.84128
							-4.68921	-1.2801		-3.24552
							-8.13278	-1.17008		-2.8161
							-6.27389	-1.1296		-2.71476
							-4.54349	-1.30868		-3.74442
							-5.46642	-2.69852		-1.8575
							-5.69216	-1.04284		-2.69156
							-5.00458	-0.969909		3.01652
							-8.306	-1.40803		-3.06281
							-4.71579	-1.33996		2.10723
							-4.98409	-2.62246		-3.18203
							-6.8022	-3.43264		2.72629
							-7.04418	-1.45273		-2.91159
							-6.40439	-2.54588		-2.6102
							-6.20246	-2.88638		-2.58184
							-6.56757	-1.81001		-3.05301
							2.33662	-1.40047		3.05183
							-7.04933	-1.98807		-2.72225
							4.94798	-1.14662		-1.60966
							-4.27478	-1.5547		-2.37461
							-8.04172	-1.3626		-2.69399
							-5.96853	-1.78056		2.37603
							-4.70406	-1.21596		2.82118
							-4.76594	-1.18216		-2.25218
							-7.91982	-1.96697		1.62303
							-6.96198	-1.121		2.9312
							1.87686	-1.1058		-2.36813
							-5.40601	-2.0986		-2.87146
							-5.07944	-1.09946		-2.68427
							3.12416	-1.1139		-2.01536
							-6.2506	-1.17304		2.03245
							-6.61321	-2.30867		2.78546
							-4.76221	-1.2182		-2.36309
							-4.49416	-2.37185		-2.8198
							-4.62563	-1.30577		-1.98942
							-7.15967	-2.41976		2.38812
							-4.97887	-1.3774		-2.66189
							-8.26841	-1.4324		-2.47282
							-5.68979	-2.50769		-2.10854
							-6.75439	-2.52781		2.56599
							-5.70443	-1.49635		-2.27156
							-4.55376	-1.51722		2.66027
							-4.58788	-2.59293		-2.38589
							-4.62459	-2.60751		-2.66226
							-5.18642	-1.55634		-2.5113
							-6.65167	-2.70355		-2.27354
							-4.36638	-1.55441		-1.78693
							2.8391	-2.7695		-2.71451
							-8.21305	-1.49309		-1.53272
							-6.98696	-2.85679		-2.57051
							-7.48169	-1.44367		1.80681
							-4.2932	-3.15982		-2.21019
							-8.33321	-1.35897		-2.58794
							-5.139	1.3033		-2.19309
							-5.05313	1.22763		2.27452
							-4.4235	-3.64066		-2.36953
							-8.02441	1.35218		-1.64175
							-4.35167	-1.82552		-2.66084
							-7.06912	1.59575		1.79459
							3.18648	-1.67012		2.77233
							-6.27036	-3.1513		-2.40745
							-6.21702	-2.38768		-2.05495
							-5.88258	-1.67637		-1.67907
							-6.49239	-3.97895		-2.54915
							-7.98706	-2.55323		1.80105
							-5.31154	-1.63457		3.20145
							-5.29846	1.66266		-2.52184
							2.33537	-1.26559		2.30347
							-4.48259	-1.23578		2.80345
							-4.64599	-2.84078		-2.66655
							5.41606	-1.34999		-2.46462
							-6.6518	-1.2636		3.54317
							-5.91792	-1.53253		-1.97278
							-6.44749	1.62219		2.19733
							-7.62896	-1.39956		1.80214
							-4.1684	-2.06853		-2.22809
							-4.61103	-1.52537		-2.4763
							-5.76263	1.5315		-1.69025
							-6.90002	-2.495		2.85157
							-7.0952	1.80428		-2.78008
							-4.059	-1.77473		3.32769
							2.10266	1.85451		1.7481
							-8.19167	-2.68089		2.64384
							-4.16125	-1.8031		-2.30682
							-6.95597	-4.3456		3.68654
							-6.95852	-1.59076		2.84191
							-5.51365	-2.33192		-2.16769
							-4.4057	-1.43218		-1.93002
							-5.02644	1.73944		-2.48673
							-4.28375	-1.37073		3.15136
							-7.79795	1.89509		1.73708
							-7.05015	-3.89832		2.33811
							-4.71634	-1.44124		2.57643
							-6.71929	-2.02687		-2.3069
							-4.09118	-2.97297		1.76554
							-6.32243	-1.40128		3.01951
							-4.20317	-2.1847		1.89261
							-4.89408	-3.4111		3.45853
							-5.36009	1.94087		3.66699
							-6.08969	1.99302		3.8398
							-4.09719	-1.66542		2.86066
							-7.99107	-1.84013		-2.08717
							2.94138	-1.69255		2.75584
							-4.98908	-4.72534		2.37328
							-5.58284	-2.65681		3.26084
							-5.08939	2.09335		1.92916
							3.18065	2.17354		2.27061
							-6.31708	-2.29284		1.8999
							-4.68362	-1.58514		2.58327
							-8.33767	-1.5738		3.55401
							2.44673	-1.83996		2.6956
							-4.47887	-4.08785		3.37273
							-7.10271	-2.10208		2.16411
							-4.06043	-1.88418		1.86667
							-7.90963	2.18709		4.02776
							-8.15088	-2.02997		2.99023
							-5.99141	2.22395		3.48607
							-6.60104	-3.0232		3.81839
							-4.32451	-1.54685		1.97701
							-5.64772	-1.57981		2.74581
							5.61912	2.21228		2.28987
							-7.0349	-3.53176		3.31558
							-4.2454	-1.77018		3.20356
							-6.91067	-5.17467		2.65759
							-6.98016	-2.33752		2.35715
							-6.53603	-4.07666		2.48872
							-4.05153	-2.58687		2.06464
							-6.55137	2.33494		3.68661
							-6.75	2.43668		4.27896
							-3.91761	-1.8218		3.03561
							-4.03389	-2.06194		2.05137
							-4.07318	-2.17462		4.07552
							-3.88987	-1.72942		3.45635
							-8.18558	2.54439		2.15398
							-7.51041	-1.67705		3.67344
							-5.23916	2.4525		3.80718
							-4.14945	-1.99167		4.0053
							-4.37496	2.58429		2.96758
							-6.17101	-4.81306		2.03278
							3.07182	-3.03839		2.04125
							-4.49388	2.30064		2.31971
							-4.71175	-1.78704		3.86048
							-5.63157	2.62358		2.72036
							-3.90252	-2.05554		4.62289
							-4.66561	-3.62862		3.25995
							-5.64346	-5.61383		3.54588
							-3.92984	2.68465		2.36622
							-3.84445	-2.98681		4.37701
							-4.89149	2.59017		2.24032
							-8.23474	-2.19638		2.62169
							-7.1898	-1.82994		3.97269
							-7.06372	-2.72343		3.04304
							-6.06954	2.35847		3.74266
							-5.04526	-2.49093		2.18904
							-3.86059	-1.83789		4.04396
							-7.12058	-4.10963		2.19415
							-6.9057	2.51887		3.87761
							-4.19709	-1.93805		5.03619
							-4.51838	-2.02843		3.44933
							-5.54863	2.75878		4.20085
							-6.98611	-5.14442		4.67971
							-7.62151	-2.10416		3.1407
							-6.27027	-3.65901		3.50148
							-7.83624	2.28567		2.66256
							-5.35748	-3.06599		4.2481
							5.32702	-4.67443		2.85122
							-8.31462	2.74		3.20918
							3.5822	2.5726		5.54946
							-6.64339	2.84224		2.44099
							-4.63706	-6.05806		3.02814
							-4.4268	-4.30113		2.36886
							-6.3096	-2.00268		2.41792
							-3.70767	-2.06325		4.0389
							-6.63793	-2.05228		4.50483
							-3.71447	2.74748		3.8086
							3.18915	-2.53215		2.61239
							-3.73095	-3.65156		5.23646
							-7.17708	2.28621		3.92503
							-5.84658	-2.15799		4.02439
							-4.21474	-3.15096		4.49454
							-4.01639	-2.33766		3.06377
							-7.81422	2.48137		3.16871
							-3.85582	2.94738		3.6258
							-5.79168	-5.47882		4.28737
							-7.1249	-2.89522		4.97881
							-4.0633	-5.09708		3.51362
							-3.7833	-6.47356		2.65429
							-5.73428	-4.37941		2.91196
							-5.66702	-3.68905		2.69539
							-4.08225	2.34478		3.01864
							-8.1607	-2.349		3.41837
							-3.65961	2.47188		2.65956
							-7.23725	2.8102		4.37009
							-4.78594	-3.32387		4.0495
							-3.93321	-2.79117		5.96666
							-6.41214	-2.25091		2.72873
							-5.21592	3.05881		4.77601
							-3.59238	-2.59848		5.51562
							-4.72085	-2.30493		3.92973
							-3.59026	3.00542		2.91549
							-8.28869	2.72522		3.89851
							-3.70093	-4.15068		4.01748
							-4.42228	-4.93153		4.76381
							-7.96333	-6.02867		3.27473
							-7.25031	-2.48476		3.11187
							-6.93504	-6.88258		2.90927
							3.84791	3.16933		4.26851
							-6.08546	-3.32356		3.79494
							4.94227	-5.4996		3.83716
							-7.7572	-2.95918		3.0251
							-6.62428	-4.73689		5.11651
							-5.97633	2.98629		4.19543
							-7.14395	2.5497		4.69169
							-4.20561	-2.77223		5.28071
							-5.17371	-2.53914		4.49848
							-5.54992	2.67779		2.97745
							-3.49793	2.54309		3.41421
							-8.01064	-2.5484		4.10138
							-4.80841	-6.51737		5.76518
							-6.49577	-2.76239		3.18155
							-7.0772	3.30173		3.73889
							-8.18917	-5.50729		4.02579
							-4.0296	-3.94033		3.66506
							-3.78266	-3.5759		6.30178
							-4.02325	-7.27181		3.52821
							-8.27753	3.00095		4.5842
							-3.43189	-3.25724		3.43279
							-5.57669	-4.56492		4.23229
							-3.44811	-4.952		5.4674
							-5.10078	-2.72219		3.42065
							-3.74708	2.74629		5.23677
							-3.65533	-6.28925		3.28298
							-3.73627	-2.86762		4.09843
							-6.20186	2.96612		3.31599
							-7.20004	-3.10726		5.11403
							3.617	3.25879		4.56631
							-5.4982	-6.97051		4.13006
							-4.63904	2.89788		4.05419
							-3.48757	2.7651		4.15916
							-3.68514	-3.75961		3.87988
							-3.4099	-5.68188		3.58564
							-7.23077	3.44651		5.85397
							-4.09127	-7.61042		4.24522
							-3.52238	-4.53212		5.99798
							-7.28602	-6.31894		4.95752
							-4.37342	-3.68578		3.81798
							-3.54202	-5.19706		4.03848
							-5.99448	3.18355		3.85373
							-3.82652	2.96156		4.45047
							-6.68834	3.10102		4.89877
							-6.48216	-6.89615		6.64602
							-6.55725	-3.05958		6.23689
							-7.07648	-3.31735		5.61992
							-3.23694	3.61017		3.78392
							-5.12007	3.06466		5.43029
							4.09055	-7.91896		3.80977
							-5.73122	-6.19787		4.24717
							-8.23306	-3.74003		3.88904
							-4.12874	3.26286		4.06163
							-4.28708	-4.49181		3.85733
							-3.65886	3.4419		4.7427
							-5.28422	-5.42888		4.24904
							4.75606	-4.92409		4.39158
							-7.72312	-7.09722		4.4132
							-4.74335	-3.4728		4.23578
							-3.99212	-4.26477		4.73975
							-7.6734	3.38734		6.62716
							-3.34592	3.79583		4.28133
							-3.18911	3.29318		4.09002
							-3.6031	3.63322		6.14447
							-3.67782	-3.79121		6.07937
							-5.47873	-6.88953		4.19477
							-5.03919	3.35542		4.24922
							-7.24462	-8.18767		4.17446
							-6.87185	-5.41109		4.19195
							-6.86123	-6.18472		5.70902
							-3.2225	3.44058		6.92811
							-8.05701	-5.08369		4.459
							-7.27333	-4.78894		7.03686
							-4.78909	3.60908		5.11971
							-3.14173	3.72924		6.58167
							-6.63153	-4.26025		5.36469
							-4.9138	3.97526		5.5979
							-7.08222	-6.93136		4.89745
							-8.26179	-7.57513		4.71021
							-3.4815	3.54391		4.5485
							-7.16159	-8.40168		4.4575
							-4.44335	3.84837		4.68881
							-3.50807	-5.95247		4.47997
							-5.40524	3.64229		4.46032
							-7.13138	-4.6855		4.46277
							-3.32976	3.66931		7.46147
							-3.79362	3.60686		4.57027
							-8.23421	3.62663		6.21956
							-2.96	-4.2067		6.32132
							-3.33219	-5.10756		4.49415
							-8.03733	-6.70382		4.52478
							-5.80773	-4.59368		5.08563
							4.08186	3.94933		5.29414
							-4.16324	-8.092		4.66703
							-3.70554	3.84255		7.15248
							-3.963	-7.64776		4.67204
							-5.03293	4.17914		7.15475
							-6.47691	3.7467		4.64615
							-5.99921	-5.66477		4.64175
							-6.57781	-8.54986		4.94225
							-3.13465	-5.02946		7.79932
							-5.6796	3.79465		4.69767
							-3.27431	4.3262		6.73869
							-3.67095	-7.28849		4.64987
							-6.03599	-6.29889		6.28005
							-4.15727	3.9997		4.91597
							-3.83258	3.87356		4.94283
							4.69403	4.1307		5.84505
							-5.22053	4.01326		5.23579
							-7.20611	-7.9051		4.69202
							-7.60797	4.36091		6.88125
							-7.55944	4.35481		4.66132
							-2.85954	-8.63585		4.96375
							-3.12321	4.01621		6.26755
							-5.96189	-5.6532		7.63116
							-7.26087	4.81536		4.96322
							-6.97487	4.01391		5.56448
							-3.45313	-7.22341		4.82173
							-6.47787	4.10524		5.66686
							-3.00591	5.34427		8.04169
							-8.10375	-6.25532		4.9041
							-7.16245	4.22014		7.40135
							-3.28989	-6.74899		7.24916
							-2.6879	-8.08698		4.81191
							-3.58108	4.43923		5.26282
							-4.36676	4.25427		6.66159
							-3.8851	4.56907		4.91211
							-3.51359	4.85694		6.20283
							-3.0476	-8.66057		4.80357
							-3.27304	4.31939		5.41486
							-4.63407	4.34181		5.1715
							-4.27786	6.06532		5.56386
							-6.80397	-7.91701		8.27698
							-7.8949	-7.31127		7.06634
							4.44123	4.51487		5.28326
							-2.97171	-6.75544		5.96137
							-3.70254	4.45743		7.65856
							-2.96032	4.75363		5.01975
							-7.80349	4.5471		5.03665
							-3.96628	4.7749		5.33121
							-2.85104	5.57636		6.88556
							-6.98933	-8.62761		5.18516
							-6.23021	4.53385		5.59596
							-6.03766	-7.59562		5.05042
							-5.53428	7.0553		7.58634
							-6.80004	6.16568		5.0762
							-7.08048	-8.15587		6.7743
							-8.19039	5.24878		5.934
							-8.13749	4.6886		8.12101
							-3.74193	4.82808		6.37411
							-5.70434	4.98269		6.38613
							-6.40061	6.66351		5.34169
							-4.77673	5.06757		5.1787
							-2.55353	4.8732		8.38805
							-7.20688	-8.53439		5.23622
							-6.51435	5.95896		5.16933
							-3.60656	4.88208		5.7198
							-2.87608	4.84238		5.81115
							4.68307	5.05116		7.30926
							-3.02433	6.52005		6.26036
							-7.40445	7.55417		5.90583
							-7.27123	5.55283		5.45198
							-3.52414	4.87357		5.56858
							-3.00229	5.19771		5.30901
							-2.78264	7.21737		5.39736
							-3.24631	4.9628		7.7009
							-2.63619	5.24423		8.43686
							-2.31679	7.99841		5.49174
							-5.52733	8.39046		6.11666
							-7.0926	5.10427		8.16187
							-3.92151	6.12858		5.43722
							-6.11304	5.17092		6.61794
							-6.87151	6.97884		7.67798
							5.12009	5.27787		5.37033
							-2.70661	5.09688		7.15253
							-2.43649	5.33996		5.40548
							-6.86716	5.14637		5.81865
							-5.96463	5.68892		5.37969
							-4.19119	7.53936		6.24491
							-2.37636	5.53538		5.98756
							-3.60984	6.8258		7.0188
							-3.37426	8.01678		7.78252
							-5.62717	5.33299		8.48517
							-8.07565	5.41277		5.78065
							-3.03302	8.22104		5.58291
							-5.01812	6.43764		5.71713
							-3.66155	7.15064		8.21544
							-3.18787	5.49049		5.5981
							-2.76551	5.40042		7.26298
							-2.49834	7.79664		5.68562
							-8.08697	5.46276		6.60426
							-7.10819	5.73695		6.88185
							-7.8832	6.26716		6.28592
							-4.6044	5.5189		5.5678
							-7.74097	5.76255		6.54271
							-5.76629	7.31748		7.66098
							-4.85867	8.01693		5.98264
							-6.25178	6.11012		5.54603
							-6.21714	5.74957		7.96318
							-5.85942	5.71597		8.27054
							-2.41631	5.83986		8.46668
							-2.66396	5.80725		7.73273
							-3.50592	6.84179		5.57565
							-3.79555	5.77283		6.22544
							-6.56677	6.093		5.77008
							-6.95498	7.61835		5.67216
							-2.5582	5.97455		6.55562
							-7.20347	6.12198		6.99054
							4.78566	5.9418		7.19855
							-6.42123	6.66724		6.32287
							4.72665	7.75208		7.62757
							-6.99097	7.20409		6.86337
							-2.64089	6.1766		6.0023
							-6.54868	6.49413		5.94373
							-7.01228	6.25558		8.06075
							-4.17995	6.17003		5.67183
							-1.97334	6.36643		8.3339
							-5.66021	6.45198		6.31013
							-3.46482	6.22713		6.62023
							-7.65399	7.43422		6.92993
							-3.6998	6.35927		7.23907
							-2.3979	6.55831		6.21475
							-2.25569	7.49643		5.99646
							-2.05201	6.68939		5.74393
							-6.84298	6.57111		5.75406
							-3.56202	6.57707		7.9369
							-5.27655	7.05486		7.51881
							-2.74943	6.46463		7.76971
							-7.97754	6.75565		5.80429
							-3.17672	6.66592		6.08119
							-2.95619	6.8063		7.33267
							-3.15778	6.98114		6.61894
							-6.64223	7.18646		8.2621
							-1.90756	6.58542		6.25066
							-1.90178	6.63765		5.9718
							-3.96194	7.22813		6.01316
							-2.10201	7.23404		8.00612
							-5.90724	7.03694		6.52722
							5.41163	6.88638		7.14164
							-7.82109	7.31594		6.78911
							-2.56583	6.7458		6.86175
							-3.40154	7.46053		6.36978
							-7.12974	7.46086		5.96999
							-3.39923	6.78543		7.44169
							-2.50292	7.10189		7.73588
							-6.851	6.96779		6.24225
							-6.64102	7.50078		6.72925
							-2.09683	7.76334		5.96265
							-4.87076	6.9396		8.24125
							-6.12566	6.96219		6.03822
							-3.67245	7.96778		7.24722
							-7.88708	7.96576		8.06473
							-5.88856	6.79835		6.60727
							-4.39411	6.81892		6.2548
							-6.80701	6.92046		6.50778
							-4.36372	7.96199		7.51954
							-6.21065	6.79217		6.3315
							-6.49141	8.11937		6.69037
							-6.32806	8.1879		7.42314
							-3.36752	7.39297		6.40896
							-7.41723	7.78016		7.11105
							-3.53503	6.70816		7.92106
							-3.38573	8.48043		7.76439
							-6.98362	7.16234		6.22721
							-5.34894	6.92226		8.27529
							-1.88191	8.48699		7.04834
							-5.70242	8.64446		7.43971
							-2.27897	8.68928		6.8716
							5.05376	7.84669		7.79585
							-3.27011	6.76593		6.45287
							-3.9595	8.84074		8.11706
							-1.87273	6.60943		6.319
							-2.33687	6.48643		6.60708
							-7.49856	7.44007		6.90089
							-5.77979	7.03495		6.42608
							-1.55833	8.39772		7.31115
							-2.98299	8.80397		7.49583
							-6.3912	8.95928		6.95398
							-2.58187	9.16238		8.34766
							-4.6045	9.13005		7.29738
							-3.38511	6.32843		8.06675
							-2.56107	7.26354		6.65342
							-1.59379	9.20931		6.81053
							-1.65002	8.03051		7.92735
							5.65324	9.09418		6.7389
							-3.74988	8.54776		6.9092
							-1.90592	6.76316		7.76273
							-5.59628	6.24571		7.30044
							-4.86568	7.37482		7.88767
							-6.56333	8.94841		6.70672
							-4.91139	9.38963		7.63306
							-1.49	9.43409		8.40111
							-2.31529	9.29111		7.35294
							-6.50727	7.58324		8.24204
							-1.78001	6.25927		7.63634
							-3.2227	8.2763		7.21028
							-7.69733	6.85222		7.41151
							-6.42538	9.53227		8.00616
							-6.30148	6.37995		7.23491
							-3.46486	8.89108		7.06965
							-7.61229	7.76448		8.49278
							3.06626	9.42834		7.93327
							-6.05791	6.64053		7.20398
							-3.29795	8.2848		7.16323
							2.81666	9.54372		7.62115
							-5.80442	7.04731		8.33026
							-4.12407	9.0428		7.84137
							-3.16221	7.52443		7.90521
							-3.28042	9.39839		7.63169
							-3.20496	8.00955		8.5848
							-4.05463	8.82442		7.5663
							-5.68821	9.07923		7.59326
							-6.83752	8.37685		7.42531
							-5.80967	8.54662		7.86972
							-6.7016			8.2479
							-7.38777			7.60831
							-2.2009			8.59656
							-5.7538			7.8954
							-6.17109			8.1689
							-6.0192			7.88471
							-1.1956			7.68687
							-1.61761			7.77647
							-3.09009			8.58472
							1.90716			8.02844
							-7.28324			8.50091
							-4.98926			7.92961
							-3.61191			8.36354
							-2.49161			8.02264
							-6.99266			8.19847
							-5.04326
							-6.26537
							5.69319
							-6.32994
							-4.16912
							-6.16658
							-6.14118
							-1.89278
							-3.09405
							-7.55333
							-1.57797
							-1.34109
							3.14638
							-2.10561
							-2.19948
							-5.16625
							-5.72471
							-1.33892
							1.08403
							2.56709
							-6.93643
							-5.76506
							-3.12115
							-0.955301
							-5.77532
							-3.15038
							-4.35959
							-3.0195
							-5.61593
							-3.11892
							-4.01767
							-3.60833
							-4.46294
							-3.19365
							-6.49925
							-2.44404
							-3.05536
							-1.29801
							-7.35983
							2.84128
							1.80895
							-5.72722
							-6.37106
							-1.03919
							-3.42194
							-4.66767
							-6.90202
							-7.20985
							-3.24552
							-5.70403
							-5.6939
							1.53093
							-1.07442
							-2.8161
							-5.21419
							-5.73666
							-5.95122
							-1.93222
							-4.88089
							-1.36794
							-5.98481
							-0.741911
							-5.66971
							-2.71476
							-3.74442
							-1.10227
							-1.8575
							-1.90557
							-2.69156
							-5.40888
							-6.62759
							3.01652
							-3.06281
							-5.49556
							-6.85803
							-4.72363
							-5.29085
							-1.03992
							-2.6295
							-0.901473
							-5.48093
							-5.52498
							-7.12409
							2.10723
							-6.98194
							-0.973243
							-3.18203
							-6.05297
							-3.86677
							-0.747037
							2.72629
							-1.64495
							-6.79534
							-5.3127
							-3.91134
							-2.91159
							-2.6102
							-5.28223
							1.37801
							-2.58184
							-2.93015
							-3.05301
							3.05183
							-5.10272
							1.16399
							-5.23131
							-2.72225
							-1.83782
							-1.01902
							-4.76581
							-5.08819
							-5.01795
							-1.14531
							-6.08833
							-4.23498
							-1.60966
							-5.81176
							-0.877159
							-4.64083
							-0.946399
							-6.46973
							-5.09649
							-5.11583
							-2.37461
							-5.38597
							-2.69399
							0.836984
							-6.61173
							-1.18209
							-6.77339
							1.31261
							-6.30424
							-3.31268
							-4.88433
							-1.99054
							-4.91664
							-4.70467
							-5.36811
							-6.58721
							-4.57001
							-1.14122
							-5.68417
							2.37603
							2.82118
							-4.82319
							-0.693652
							-1.24261
							-2.25218
							-3.09302
							1.62303
							-1.54657
							-4.47323
							0.805361
							2.9312
							-0.97962
							-2.83776
							-4.53414
							-5.07461
							-1.11017
							-2.36813
							-5.5867
							-0.989881
							-2.87146
							-4.61935
							-1.09045
							-2.68427
							-3.75364
							-3.44625
							-4.62669
							-0.885773
							-5.90187
							-1.25007
							-4.4192
							-1.68302
							-1.41193
							-3.75332
							-4.26956
							-2.01536
							-2.38109
							-1.20136
							-6.37385
							-5.41953
							-4.34654
							-6.07791
							0.54019
							2.03245
							-3.88054
							-2.29748
							-6.15441
							-0.576818
							-4.49347
							-4.13924
							2.78546
							-5.25992
							-2.36309
							-2.96094
							-1.90236
							-2.8198
							-1.21365
							0.563503
							-1.98942
							-6.03818
							-1.50607
							-5.52245
							-4.75355
							-4.32921
							-5.05545
							2.38812
							-5.44833
							-3.66375
							-2.08932
							-4.38193
							-2.66189
							-2.70131
							-1.62443
							-1.76258
							-1.85441
							-1.50344
							-5.34566
							-2.41425
							0.56721
							-0.991493
							-4.51931
							1.13335
							-0.833505
							-1.19869
							-3.95094
							-2.47282
							-3.83372
							-2.10854
							-5.53292
							-3.89629
							-1.96419
							2.56599
							-3.26935
							-5.90736
							-3.44206
							-5.88872
							-2.95292
							-3.69754
							0.518719
							-3.02999
							-4.17073
							-3.33283
							-4.89919
							-0.659976
							-1.20506
							-4.81734
							-2.27156
							2.15803
							2.66027
							-5.29662
							-4.67469
							-5.57776
							-5.60472
							0.414875
							-3.11634
							-2.07383
							-1.88464
							-2.56273
							-5.37519
							-2.38589
							-2.66226
							-3.91176
							-3.91044
							-5.03247
							1.15876
							-2.5113
							-1.24432
							-2.70747
							-1.60788
							-2.63275
							-2.17324
							-1.27199
							-3.60307
							-1.41904
							1.75945
							-2.96261
							-3.60825
							-1.08393
							2.41619
							-2.14374
							-4.15205
							-1.58215
							-3.24156
							-4.11061
							-3.99138
							-1.54875
							-2.86852
							-0.877418
							0.29187
							-0.874714
							0.628652
							-5.40147
							-1.53265
							-3.35471
							-2.60505
							-4.51597
							-5.08494
							-4.39961
							-4.97987
							-2.30899
							0.483615
							-1.85973
							-3.07513
							-4.40833
							-2.08614
							-0.987718
							-0.931491
							-4.02912
							-3.40152
							-4.72064
							1.36157
							-1.80692
							-5.3346
							-5.11965
							-3.82176
							-5.24275
							-2.7127
							-3.52313
							2.20873
							-3.23611
							1.69218
							-1.25412
							-2.42951
							2.48222
							-0.298458
							-2.61919
							-2.43224
							2.65172
							0.44127
							-2.15413
							-2.11737
							-3.74351
							-3.02659
							-1.25814
							2.56618
							-2.07789
							-1.92309
							-3.9606
							-3.19716
							2.00937
							-1.67511
							-0.471676
							-1.31658
							1.25416
							-0.986495
							-4.07215
							0.676617
							-2.67271
							-4.30606
							-4.81502
							2.43002
							1.50954
							2.34555
							0.349519
							-1.7337
							-0.565982
							-0.597919
							-3.38553
							0.911767
							-3.31594
							2.70198
							-1.04364
							-4.86428
							-1.57037
							-4.00216
							-4.77474
							-2.63812
							-2.05924
							-4.01915
							-1.61309
							-5.34522
							-2.17725
							-4.86426
							-4.4341
							-3.43934
							-2.13641
							-2.56152
							-3.45606
							2.74323
							-4.37493
							2.30974
							-3.10701
							-1.5312
							-2.39202
							-4.20363
							2.84195
							3.16874
							-1.18152
							-4.14167
							0.84788
							-0.15824
							-3.54837
							2.0314
							1.90075
							1.55423
							3.23864
							1.37595
							1.47102
							-1.82175
							-4.4712
							0.922655
							-3.60032
							0.251621
							-1.19528
							2.61871
							-0.577884
							-0.794107
							2.53693
							-4.50971
							-3.9104
							-2.01202
							1.78372
							-3.3722
							0.712431
							-1.78809
							3.33914
							-2.88949
							-2.78746
							-2.01125
							-2.13884
							-1.7487
							-4.27216
							3.31522
							-2.35196
							-4.24556
							3.53996
							-5.39871
							-3.66434
							-1.57059
							1.72553
							-1.00267
							1.80193
							0.617425
							2.01923
							1.58562
							0.900317
							3.03045
							-3.82777
							2.37853
							2.38126
							-3.22699
							-3.96782
							-4.19784
							-1.87433
							-1.72625
							-4.42017
							-4.53317
							1.62577
							-1.8618
							-0.356162
							-3.27291
							-2.51788
							-4.15477
							-4.21643
							-2.53865
							-1.51983
							-3.10053
							0.348308
							2.30256
							-1.34743
							3.6608
							-3.67672
							3.02443
							-1.15864
							1.06127
							2.62691
							-3.62892
							-3.32921
							1.50581
							-0.736662
							-1.10908
							3.19462
							2.18743
							0.899044
							-3.85808
							-2.09457
							-1.90623
							-2.15607
							-3.67141
							-1.36657
							2.12422
							-1.65839
							2.40514
							-0.691212
							1.52684
							-3.83555
							-1.50991
							-3.2939
							-1.04937
							1.81233
							-1.73978
							-3.12705
							-2.15831
							-3.91469
							-0.814577
							3.61045
							-1.27447
							-3.39319
							-4.94923
							-1.65161
							-3.81481
							-4.92618
							-0.559954
							2.31743
							-4.26345
							2.5711
							2.76124
							-3.50809
							-4.07023
							-2.57206
							1.86413
							2.632
							1.42203
							2.59625
							-1.36543
							-5.05276
							-2.1469
							0.469461
							2.83742
							1.23732
							1.41197
							-0.889727
							-3.6853
							-2.9009
							3.09294
							-4.96923
							3.20216
							-3.35623
							-1.45064
							-2.05917
							-4.84189
							1.66768
							-2.89563
							-1.20745
							-3.61969
							-1.52132
							-3.38215
							-1.3735
							3.3844
							-1.48301
							1.97734
							1.13572
							-1.00768
							-3.15007
							2.42656
							1.08327
							-0.710048
							-0.772379
							-2.19688
							-1.3248
							-3.34544
							-1.13036
							-3.43679
							-3.34706
							2.39343
							-1.41833
							-3.28597
							2.50949
							-1.49815
							-1.81579
							-3.2688
							-2.33249
							2.67153
							1.15943
							0.967276
							-4.34327
							-3.33489
							-4.54121
							1.68171
							3.15935
							-5.32299
							4.19656
							-1.0742
							3.95487
							3.03111
							2.90473
							-2.02762
							-4.81954
							-1.63722
							3.11659
							0.218095
							-1.44713
							1.45714
							-5.13673
							2.59276
							-5.37659
							-1.12322
							3.12971
							-3.28832
							2.80432
							0.891522
							1.75812
							-1.40076
							5.73161
							-0.998189
							-5.08021
							-1.24797
							2.52178
							3.51807
							-2.5459
							-2.85018
							-3.13657
							-0.806398
							-1.83303
							6.01237
							-0.832671
							-3.03438
							-1.31214
							-2.68923
							-3.76862
							3.16386
							-1.29852
							-1.05919
							-1.16166
							-1.81916
							0.763179
							-1.22316
							2.53248
							-3.12349
							0.73241
							3.16727
							2.21644
							1.63036
							2.99109
							-3.21895
							-4.35034
							2.66677
							-0.772326
							3.23495
							4.79581
							-5.36352
							4.15118
							-5.43013
							3.15135
							-1.85415
							-0.977718
							-2.05407
							-3.81011
							4.42666
							1.17448
							-2.17454
							0.645074
							1.80495
							2.81379
							2.72193
							-1.30458
							-5.19167
							-0.620778
							-0.762221
							2.46407
							-1.30803
							-2.95853
							-2.72793
							-0.949427
							-2.94065
							-5.33739
							-5.0884
							-2.5494
							-0.985343
							-1.4851
							3.84363
							3.90727
							-3.02551
							5.72832
							3.16778
							-3.86374
							-1.2782
							-1.19366
							-1.18378
							3.02228
							3.36639
							-0.840617
							3.06513
							-2.77283
							-0.963623
							2.87432
							2.98147
							2.08348
							2.06715
							-3.28014
							1.62277
							-1.23033
							2.66431
							0.919073
							-5.44434
							0.550234
							-2.82522
							-1.34476
							0.927035
							-1.81467
							5.1196
							-2.13182
							3.17553
							0.669509
							4.55046
							-1.34422
							-4.25793
							3.10842
							-2.7516
							-2.01477
							0.471852
							-2.66629
							2.70812
							-5.47217
							-1.82902
							-0.974545
							4.98095
							4.2227
							-1.13789
							-1.65389
							-3.34567
							1.94066
							-2.37801
							-0.986092
							3.35855
							-1.2801
							-5.45412
							-5.19872
							-1.17008
							-1.1296
							2.95292
							-4.81433
							-2.31591
							-1.30868
							-2.69852
							4.17825
							-5.70433
							-2.60025
							-3.2709
							-1.04284
							1.42888
							4.15461
							-0.969909
							-1.40803
							-1.33996
							0.690275
							-5.51269
							2.99595
							2.24781
							2.50219
							-2.62246
							-3.43264
							0.688748
							2.74279
							-8.03637
							4.98318
							-1.90323
							-1.45273
							-2.54588
							-2.88638
							-1.81001
							2.8415
							-2.17324
							2.94835
							1.36939
							-1.40047
							-1.98807
							4.62877
							0.950813
							2.85276
							2.93157
							-1.14662
							-4.02428
							-2.68356
							-2.6385
							-2.75708
							-2.77831
							2.59934
							2.62623
							-2.82597
							-2.79654
							2.66408
							2.71189
							2.72646
							2.70237
							-2.57664
							2.64088
							-2.50557
							-1.5547
							-1.3626
							-1.78056
							-1.21596
							-1.18216
							2.62073
							-1.96697
							-1.121
							-1.1058
							-2.0986
							-1.09946
							-1.1139
							-1.17304
							-2.30867
							-2.14174
							-1.2182
							2.49101
							-2.37185
							-1.30577
							-2.41976
							-7.61454
							-9.46656
							-7.48861
							-1.3774
							-1.87186
							-1.4324
							2.17333
							-2.50769
							-2.52781
							-7.29601
							-4.03136
							-1.49635
							-8.02726
							-1.51722
							1.81972
							-1.61986
							-0.79261
							-2.59293
							-0.997751
							-2.60751
							-1.36923
							-1.25681
							-1.55634
							1.11539
							-2.70355
							-1.55441
							1.12709
							-9.52875
							-2.7695
							-1.49309
							-2.85679
							0.822903
							-13.2436
							-1.44367
							0.525665
							-3.15982
							0.472154
							-1.35897
							1.3033
							1.22763
							0.452538
							0.531007
							1.05657
							1.02482
							0.74391
							-3.64066
							-11.9504
							-5.30727
							-4.65702
							4.4086
							4.40409
							-4.07512
							-4.7263
							4.43122
							-5.75498
							4.4954
							-5.59982
							5.31836
							4.85962
							-5.61611
							-5.59008
							-5.71637
							5.62742
							5.19013
							5.12395
							4.8464
							4.51138
							4.2415
							4.07683
							3.69158
							3.41695
							2.95827
							2.43546
							2.24315
							-2.2307
							-2.58364
							-3.11609
							4.46951
							1.35218
							3.39462
							2.47752
							-3.59426
							4.79111
							-1.82552
							1.59575
							-1.38404
							-2.5502
							-9.85103
							-2.42316
							-1.67012
							-3.1513
							-2.38768
							-1.67637
							2.41002
							5.18074
							-10.0303
							2.35029
							0.48125
							-3.97895
							-2.55323
							1.26655
							-1.71628
							-2.65839
							-5.6077
							1.06846
							-1.63457
							1.66266
							-1.26559
							4.74352
							-0.91658
							-1.23578
							-4.38351
							-8.70501
							-5.59264
							4.56803
							-2.84078
							-1.34999
							2.57209
							-4.44285
							-2.49545
							-1.2636
							-1.53253
							-9.71347
							5.76068
							1.62219
							4.06362
							-1.39956
							-2.06853
							-1.32046
							-3.23482
							-1.52537
							1.5315
							4.90825
							5.18036
							1.44379
							-11.2911
							-5.75484
							-1.90345
							-4.71918
							0.797862
							2.6199
							-2.495
							-2.48665
							4.46459
							1.80428
							4.89108
							1.25071
							-2.63405
							-1.77473
							5.38368
							-9.76065
							0.399199
							1.85451
							-2.68089
							-9.68162
							-5.61913
							-10.5067
							2.58093
							-1.8031
							-6.62973
							-4.3456
							3.23068
							-1.11755
							-2.39955
							0.757986
							-1.59076
							-2.33192
							2.4283
							-1.43218
							4.30514
							-2.29172
							1.73944
							-1.37073
							1.89509
							4.65694
							-2.6071
							-3.99863
							-3.89832
							4.68699
							4.72254
							-1.44124
							1.61807
							-2.02687
							-4.57371
							-5.67315
							-2.97297
							-1.40128
							-2.1847
							-3.4111
							1.94087
							-1.33255
							-8.63517
							-10.2066
							5.79903
							1.99302
							-3.58438
							-1.87813
							-0.548365
							1.28586
							-5.49594
							0.410408
							5.04211
							-3.44548
							-1.66542
							-1.84013
							3.04828
							-2.80907
							-5.40954
							-4.16528
							-5.57735
							5.44778
							-2.73195
							-1.69255
							2.46149
							4.42033
							-4.72534
							-2.38244
							-9.35906
							-0.837959
[truncated: 1,603 more rows]

## Sheet: Blad2
	mean	std	95low	95up	surface		face	forehead	nose	cheeks	upper lip	chin
face	1.27786	5.28655	-7.55618	7.62047	15608		-2.90849	-3.03329	5.16864	-2.99276	7.1058	-8.60476
forehead	4.46648	2.34661	-1.54869	6.91042	3546		-3.02785	-2.64735	5.30566	-3.04627	7.14749	-9.05112
nose	3.11147	4.72528	-6.64516	6.60053	827		-3.1963	-2.86437	5.36305	-2.98139	6.92507	-9.59331
cheeks	-1.2823	5.12163	-7.95627	7.6591	4150		-2.88292	-2.56704	5.38515	-3.11518	7.03541	-8.25404
upper lip	1.53083	5.99488	-9.98468	6.8289	628		-3.10047	-2.25033	5.16831	-3.04832	6.62863	-7.98491
chin	-4.62171	5.52325	-8.84618	7.56281	613		-3.55569	-2.75667	5.86126	-2.97571	6.75383	-7.75627
							-3.05102	-1.92454	5.73891	-3.0809	6.22878	-8.5818
							-2.99496	-2.32516	5.00195	-2.98998	6.70569	-7.55867
							-3.00713	-1.68653	5.57781	-3.11179	6.9037	-9.43591
							-3.8105	-2.64368	5.71407	-3.21527	6.85754	-7.88752
							-3.23186	-1.91799	6.18886	-3.02394	6.85392	-7.36446
							-2.89856	-1.52947	4.79551	-3.01361	6.56644	-7.49659
							-3.17454	-2.34281	5.44255	-3.13582	5.78425	-8.29013
							-3.14386	-1.57355	5.69274	-2.99635	6.52776	-7.09355
							-2.90133	-1.95429	6.13213	-3.00287	6.6606	-9.25698
							-3.26531	1.4089	4.75335	-3.01059	6.27469	-7.62298
							-2.98188	-2.54216	6.21642	-3.04638	5.35922	-7.07452
							-2.99529	-1.35353	5.1961	-3.19015	5.93386	-6.80026
							-3.93953	-1.53952	6.47899	-3.03639	6.67409	-7.13264
							-3.67227	1.32212	6.45307	-3.12263	6.41211	-9.11842
							-3.1115	-1.37906	6.34826	-3.21731	6.50016	-8.45205
							-2.99381	-2.02569	5.80912	-2.97224	5.16864	-7.76488
							-3.11664	-2.23817	6.15189	-3.20587	5.59473	-6.53704
							-2.97269	-2.4303	4.72582	-2.99955	6.09101	-6.46787
							-3.65441	-1.72959	5.10281	-2.97164	6.25806	-7.33278
							-3.2594	-1.273	5.48272	-3.00497	6.38603	-6.63313
							-3.48869	1.27995	5.48651	-3.11261	6.33949	-9.02479
							-2.98095	1.2395	6.35136	-2.91921	5.38515	-6.08114
							-3.17556	-1.44551	6.15313	-3.09842	5.81341	-5.99895
							-3.06042	-1.78644	6.09567	-3.04706	5.85777	-6.0804
							-3.02944	-1.28627	4.63956	-3.15529	5.57781	-7.73251
							-4.01795	-2.00112	3.95275	-2.88929	5.94583	-6.25494
							-2.99276	1.21291	6.39183	-2.88262	6.1063	-5.78108
							-3.2886	1.2438	5.76717	-2.9807	5.43278	-6.9037
							-3.04627	-2.39479	4.94298	-2.87087	5.95144	-8.85078
							-3.70951	-2.1641	5.52943	-2.97444	5.64994	-5.66056
							-2.98139	-1.87486	5.93153	-3.17511	5.69274	-5.90229
							-3.87897	-1.62421	4.52953	-3.05378	5.79538	-6.22353
							-3.5691	-1.3465	5.34063	-2.82102	5.45891	-5.56383
							-3.14044	1.23439	5.39649	-2.98344	5.96906	-7.18407
							-3.34472	1.18336	6.09216	-2.80923	5.76575	-8.06546
							-3.10621	1.2498	5.41443	-2.86065	5.48272	-6.53087
							-3.11518	1.30683	6.47612	-3.23227	5.59582	-8.73843
							-3.04832	-2.05058	6.50932	-3.12044	5.75788	-5.37618
							-3.22198	1.30998	4.91857	-2.95135	5.40603	-5.33208
							-3.46337	1.21303	4.53441	-2.806	5.92788	-5.52422
							-3.62966	-2.42127	5.25957	-2.9075	5.62657	-5.93807
							-2.97571	-2.21842	5.81968	-3.05926	5.75474	-6.58665
							-3.47667	-1.53046	5.62955	-2.84181	5.34063	-5.22854
							-3.22109	1.28601	4.66905	-2.81651	5.71836	-7.32044
							-3.96637	1.22269	6.22537	-2.97175	5.68412	-8.72682
							-3.65516	-1.91476	4.97332	-2.87696	5.79702	-5.2816
							-3.0809	1.26999	5.95852	-2.74481	6.00356	-5.16713
							-2.98998	1.28662	5.29231	-3.15963	5.64711	-5.5719
							-3.44134	1.23317	6.00356	-2.95366	5.55434	-5.88405
							-4.03093	-1.70079	5.82095	-3.11958	5.60484	-6.76219
							-3.11179	-2.56202	5.5278	-2.87006	5.5934	-5.41508
							-3.21527	1.41729	5.27914	-2.86183	5.60556	-7.86135
							-3.27748	-1.5404	4.99231	-2.79503	5.89995	-5.27071
							-3.20595	1.32542	6.68578	-2.86548	5.33528	-8.76047
							-3.02394	1.41938	4.6536	-2.69839	5.25891	-6.1691
							-3.01361	1.46682	6.59106	-2.82916	5.24242	-5.21958
							-3.71166	-2.40731	4.75258	-2.6963	-5.3554	-8.22928
							-3.66281	-2.0365	5.81197	-2.79009	-5.37177	-5.7952
							-3.13582	1.33366	4.80458	-2.81246	-5.34192	-7.64549
							-3.26561	1.32258	4.94738	-2.91086	5.00881	-5.61627
							-3.77893	1.87588	-6.12512	-3.26094	5.05266	-6.71658
							-3.47326	1.51797	5.39154	-2.59821	5.49422	-5.42621
							-2.99635	1.45732	4.73978	-2.73287	5.03252	-5.49566
							-3.22508	1.35056	6.53081	-2.82151	5.03326	-5.51708
							-3.36013	1.40627	5.74504	-3.19414	5.12582	-5.69253
							-3.00287	2.76582	5.89995	-2.7695	5.10147	-5.9419
							-3.01059	2.48954	5.02288	-3.00468	5.09056	-6.12938
							-3.04638	1.55134	5.81748	-2.58797	4.87487	-6.23863
							-3.19015	1.78823	6.39225	-2.80492	4.88097	-6.52865
							-3.39232	1.59134	6.86929	-2.81024	4.87289	-6.74002
							-3.84754	1.60043	5.66138	-3.07341	5.14339	-7.0323
							-3.50185	1.38365	4.91456	-2.59108	-10.1282	-7.39778
							-3.03639	2.10241	7.01917	-2.64127	4.68567	-7.6212
							-4.18081	1.54153	6.88721	-2.835	-12.8135	-8.19675
							-3.12263	1.4969	7.05734	-2.70337	-9.55425	-8.52869
							-3.21731	1.58114	-6.8942	-2.7672	-4.74767	-8.84594
							-2.97224	2.43581	6.70853	-2.72985	4.71229	-7.07954
							-3.2337	3.0737	6.45945	-2.77862	-12.7508	-5.97129
							-3.20587	1.66207	-6.64389	-2.48856	-4.60541	-7.90965
							-3.68104	1.69392	-6.48887	-2.52226	-9.13565	-6.33201
							-3.26311	1.50575	6.01959	-2.86283	4.65758	-8.46048
							-3.54694	1.69539	5.95802	-2.76545	-13.4608	-5.6807
							-2.99955	1.68228	5.87667	-2.68603	-6.26379	-6.86594
							-3.87617	1.90482	5.81475	-3.12331	-11.2478	-8.82399
							-2.97164	2.19771	-6.16347	-2.6003	-4.74963	-5.95756
							-3.37478	1.46028	5.76193	-2.73551	-11.043	-8.28573
							-3.00497	2.94205	-6.08533	-2.48577	-6.64505	-6.25537
							-3.21803	1.60854	5.78475	-2.73448	4.54106	-7.65207
							-3.11261	1.6596	-5.87181	-2.87619	-10.6311	-6.96313
							-2.91921	1.67604	5.79534	-2.99617	-6.09186	-6.69019
							-3.09842	2.63657	5.74499	-2.60414	-5.18786	-6.07791
							-3.04706	1.73362	5.73514	-2.72655	-6.83658	-6.49983
							-3.5383	1.99625	5.49422	-3.21597	4.52557	-8.71349
							-3.65247	3.45484	5.64769	-2.75471	-5.58001	-8.19674
							-3.38131	1.83757	5.43286	-2.7947	-5.50478	-6.37793
							-3.31919	3.22218	5.26945	-3.23737	-4.98682	-7.83723
							-3.15529	1.9699	5.08263	-2.44655	-5.38662	-7.39636
							-2.88929	1.62536	5.01046	-2.41117	-4.94442	-7.03042
							-2.88262	1.99531	4.97502	-2.73889	4.93894	-6.52558
							-2.9807	1.91123	4.79762	-2.73082	-4.67632	-6.82082
							-2.87087	2.48149	4.8009	-2.73747	-4.44354	8.55439
							-3.48465	1.77072	4.90454	-2.78539	4.97599	-7.92018
							-2.97444	1.90228	4.86278	-2.50142	-5.28581	8.32903
							-4.28564	1.88048	4.80709	-2.61844	-5.03555	-8.16161
							-3.46847	2.1584	4.92672	-2.74415	-4.75915	-7.20599
							-3.17511	2.21227	5.89315	-2.81809	-4.57416	-7.74163
							-3.28951	3.16503	7.21468	-2.54005	-4.12738	-7.55564
							-3.05378	3.88509	6.68769	-2.69887	4.86961	-6.95364
							-3.48883	2.57958	5.75598	-2.38523	-5.65918	8.14184
							-2.82102	1.98033	5.07334	-2.85562	-4.75759	-7.95712
							-2.98344	2.03611	5.14339	-2.83752	-5.34371	-7.39088
							-2.80923	1.88717	-5.8436	-2.70764	-4.44	-7.73219
							-2.86065	2.23995	-6.95304	-2.41598	4.5147	7.94803
							-3.23227	3.70726	4.7266	-2.86756	-4.65438	-7.61432
							-3.12044	2.16575	5.44197	-2.5583	-5.10791	-7.41343
							-2.95135	2.22443	-6.5471	-3.17256	5.94189	-7.3052
							-3.99459	2.08096	4.88341	-2.82135	-4.36378	7.62506
							-3.2641	2.44068	4.69622	-2.68593	6.09579	-7.72218
							-3.35114	2.19928	-6.04567	-2.8025	-5.69959	7.71416
							-3.42722	2.25018	4.68713	-2.99042	5.90933	-7.53003
							-3.31298	3.40792	7.08045	-2.64983	-5.55853	-7.6468
							-2.806	2.43178	4.57883	-3.25943	-5.05012	7.48723
							-2.9075	2.41296	-7.30036	-2.49558	-4.74067	7.27473
							-3.05926	2.11163	4.99348	-2.42261	6.22926	7.03471
							-2.84181	2.26221	6.01201	-2.40261	-5.06083	7.55954
							-3.25467	2.84682	-5.5968	-2.64794	6.15035	-7.62845
							-2.81651	2.24148	6.32466	-2.99322	-5.37726	-7.55389
							-2.97175	2.52073	4.71229	-2.45658	-5.97093	7.2851
							-3.29554	4.16836	5.92121	-3.06759	-5.66218	6.47021
							-2.87696	2.48519	-6.47074	-2.68179		7.64472
							-3.3019	2.38965	4.82348	-2.99359		6.84213
							-4.38202	2.63369	-6.93573	-2.81718		7.34289
							-2.74481	4.08069	4.51839	-2.935		7.55503
							-3.15963	2.47219	-5.74817	-2.91507		6.98669
							-3.24157	2.42561	-6.12176	-2.68613		5.93205
							-2.95366	2.71542	5.28068	-2.82107		7.38671
							-3.76123	3.73393	4.4061	-2.47459		6.3802
							-3.23201	2.66276	4.88928	-3.04633		7.14131
							-3.22059	3.18872	-7.1802	-2.64164		6.8147
							-3.11958	2.36922	-7.00533	-2.78151		6.48047
							-2.87006	2.58288	5.99407	-2.53491		5.47142
							-2.86183	2.55965	-6.58343	-2.54891		5.76397
							-2.79503	3.02281	-5.43747	-2.92035		6.09234
							-2.86548	2.87141	4.65758	-3.26501
							-3.03329	4.59852	4.47407	-3.19992
							-3.15158	2.74974	6.13327	-2.59653
							-2.69839	2.75016	-5.59414	-3.29528
							-2.82916	2.83734	4.95574	-2.55845
							-2.6963	2.92796	-5.96272	-3.16278
							-2.79009	4.35062	-7.03211	-2.69813
							-2.81246	2.67411	6.02157	-3.22439
							-3.20701	3.69845	4.60791	-3.1547
							-3.18895	2.94419	-6.4996	-3.06096
							-3.23311	2.64196	5.74772	-2.64815
							-3.50561	2.68191	-6.84899	-2.89814
							-2.91086	2.77537	-5.45681	-3.27147
							-3.26094	3.12723	4.54106	-2.68223
							-2.59821	4.80463	-5.06013	-2.80887
							-2.73287	4.34362	4.68311	-2.54432
							-3.05647	3.45323	-6.3543	-2.90818
							-3.06049	2.95179	-5.53317	-3.46111
							-2.82151	2.8645	-6.65661	-2.58509
							-2.64735	3.20453	5.99717	-3.57273
							-2.86437	3.25593	6.33136	-3.49055
							-3.19414	3.13501	-4.90591	-3.08416
							-2.7695	3.18964	5.59665	-3.69214
							-3.00468	2.98675	4.6688	-2.73348
							-2.58797	3.20633	-5.93516	-2.58693
							-2.80492	5.08231	4.52557	-3.13373
							-2.81024	3.07212	-4.78371	-2.90976
							-4.52883	3.12569	4.57812	-3.4768
							-3.18499	4.24107	5.80707	-3.70984
							-3.07341	3.4973	-4.88037	-2.96112
							-2.59108	4.66913	4.93894	-3.69902
							-2.64127	3.41673	-4.47066	-2.99977
							-3.03804	3.26174	-4.79366	-2.82425
							-2.835	3.55585	5.26532	-3.53589
							-2.70337	3.3098	-4.42899	-2.89996
							-4.02342	4.05303	4.97599	-3.17503
							-3.06675	3.20195	-4.52725	-2.51468
							-2.56704	3.41695	4.58007	-4.08667
							-2.7672	5.41813	4.86961	-2.48967
							-2.72985	3.70693		-3.04478
							-2.25033	3.39252		-2.54862
							-2.77862	3.37301		-3.18622
							-2.48856	3.72121		-3.47721
							-2.75667	4.57982		-3.34659
							-2.52226	3.82074		-4.09669
							-2.86283	3.78698		-4.21366
							-2.95816	3.53081		-3.67619
							-2.76545	3.70391		-3.22049
							-2.68603	3.63188		-4.42604
							-3.12331	3.76166		-4.17371
							-2.6003	3.94681		-2.61579
							-2.73551	4.08757		-3.01379
							-2.48577	3.38773		-4.30829
							-1.92454	3.70055		-3.95452
							-3.10867	5.64945		-4.11911
							-2.73448	3.58132		-4.72678
							-3.38608	4.59248		-2.67848
							-2.87619	5.11067		-3.88055
							-2.99617	3.92277		-3.11056
							-2.60414	3.7281		-3.68526
							-3.85293	4.0663		-3.63812
							-2.72655	3.83658		-2.72139
							-3.21597	3.95038		-2.49622
							-2.32516	3.85535		-4.86863
							-1.68653	4.15166		-4.57687
							-4.55518	3.54402		-3.90318
							-2.75471	4.1891		-2.88091
							-2.7947	4.25827		-2.48518
							-2.64368	5.71958		-4.44726
							-3.23737	3.74945		-3.00123
							-1.91799	4.85826		-3.37219
							-3.22519	3.62704		-5.17882
							-3.16704	3.90343		-4.90273
							-2.44655	4.16428		-5.14548
							-2.41117	4.08704		-5.0375
							-3.15927	4.31676		-4.7671
							-2.73889	4.17429		-3.09338
							-2.73082	4.18826		-4.57452
							-2.73747	3.92493		-4.36439
							-2.78539	3.95121		-4.15203
							-1.52947	4.31861		-5.50042
							-2.50142	4.64663		-2.6437
							-2.87889	4.35485		-3.85976
							-2.61844	5.57594		-4.54097
							-2.74415	3.67277		-4.99595
							-2.81809	4.05725		-3.0328
							-2.8837	3.85622		-2.49962
							-2.72912	4.06679		-5.59752
							-2.34281	5.69397		-2.56439
							-3.95963	4.31285		-4.35909
							-1.57355	4.15085		-2.90011
							-2.54005	5.08427		-2.88836
							-1.95429	4.48491		-5.32507
							1.4089	4.56175		-5.84057
							-3.46322	4.37967		-4.657
							-2.54216	4.36096		-4.94938
							-3.09639	4.60873		-3.25947
							-2.69887	3.79795		-3.72596
							-2.38523	4.12004		-6.11373
							-2.85562	4.12192		-5.72538
							-2.83752	4.35906		-6.11056
							-2.70764	5.66188		2.49879
							-2.41598	4.23261		-6.11767
							-2.86756	5.6404		-5.81928
							-2.5583	4.77195		-2.68299
							-3.17256	4.57582		-5.29456
							-1.35353	4.314		-6.26318
							-2.82135	4.02649		-5.20237
							-2.68593	4.74651		2.58873
							-2.87125	4.66171		-2.96318
							-2.8025	5.48504		-2.76675
							-1.53952	4.71202		-5.07373
							-4.53865	4.49205		-5.93765
							1.32212	4.47806		-6.60305
							-2.88686	4.39638		-4.59885
							-1.37906	3.82978		-5.95352
							-2.99042	4.20258		2.84459
							-2.64983	5.59107		-6.51065
							-2.02569	4.42527		-3.59956
							-3.14658	4.26002		-5.72045
							-3.25943	4.01833		-6.83097
							-2.49558	4.49839		-6.97667
							-2.42261	4.30679		-6.9904
							-2.40261	4.85976		2.59454
							-2.64794	4.77347		3.01579
							-2.99322	4.6672		2.57203
							-2.23817	4.29876		-6.07884
							-2.4303	4.92303		-4.37793
							-2.45658	3.89713		-5.28979
							-3.21099	5.54834		2.78102
							-1.72959	4.60438		-6.68743
							-3.06759	4.92635		2.74554
							-2.56118	4.21113		-5.7341
							-2.68179	4.46525		-6.62319
							-3.90364	3.89567		-6.23218
							-2.99359	5.49186		2.93727
							-2.81718	4.57692		-7.11864
							-1.273	4.64815		-7.31641
							1.27995	4.45594		-7.34168
							-2.935	4.1399		-7.53669
							-3.02164	4.33826		-5.0824
							-2.91507	4.32176		2.6627
							-3.2805	4.90658		2.86541
							-2.68613	5.00328		2.74203
							-2.82107	4.8645		-6.7282
							-2.47459	4.97928		-7.34616
							1.2395	3.90184		-4.61269
							-3.04633	5.09295		3.28081
							-1.44551	5.11322		-4.12737
							-2.64164	4.52795		3.02528
							-1.78644	5.51919		2.66313
							-2.95082	4.56449		-7.33315
							-2.6633	3.91706		-6.32972
							-2.78151	4.26449		3.80551
							-2.53491	4.28062		-6.97699
							-1.28627	4.47806		2.76617
							-2.00112	4.4351		-5.69968
							-2.54891	4.71965		-7.19389
							-2.91548	4.34123		-7.94976
							-4.5827	5.32258		-7.84246
							1.21291	4.82165		-7.83183
							-2.92035	5.03843		-5.20435
							1.2438	4.29303		2.97877
							-3.26501	5.23152		-8.12632
							-3.19992	5.52831		3.6963
							-2.39479	3.80077		-4.68938
							-2.1641	4.52639		-7.71289
							-2.59653	3.92582		2.92311
							-3.29528	4.60926		3.28867
							-2.55845	5.06408		-8.16791
							-3.43684	4.88868		-6.73503
							-3.16278	5.55033		2.77028
							-3.18277	4.31158		2.86309
							-3.84271	4.91969		-7.9406
							-2.69813	5.56812		2.91628
							-3.22439	4.39997		-7.67614
							-3.1547	5.16726		-6.2645
							-3.06096	5.36588		4.29106
							-2.64815	5.39476		-8.38629
							-2.89814	4.53109		-8.26523
							-3.27147	4.7001		-7.59887
							-3.04184	4.37362		-5.84622
							-2.68223	5.1974		-5.36161
							-1.87486	4.77883		2.8093
							-1.62421	3.97625		3.61971
							-1.3465	4.22366		3.9433
							-2.80887	5.26822		-8.14207
							-2.54432	4.06286		-8.52404
							1.23439	5.48077		3.0085
							-2.8567	4.87142		-8.10219
							-3.24284	4.98187		-7.50676
							-2.90818	5.28034		3.07477
							-3.46111	4.37292		3.40288
							-2.93719	4.55762		-8.40288
							1.18336	5.0741		-7.08044
							1.2498	5.1905		-4.92959
							-2.58509	5.5431		-8.57448
							-3.57273	4.39485		-6.63283
							1.30683	4.72875		-6.00032
							-3.49055	4.45331		-8.03709
							-2.05058	4.63453		-8.77323
							-3.08416	3.75559		3.01692
							1.30998	5.301		3.02052
							1.21303	5.29144		4.49727
							-3.69214	5.38827		-8.76027
							-2.42127	4.21142		-5.52716
							-3.31421	5.28245		-8.43896
							-2.73348	4.8711		-8.72424
							-2.58693	5.02204		3.74666
							-3.80985	5.07937		3.14245
							-2.70837	4.08994		-6.40875
							-3.13373	5.17044		4.13533
							-4.65989	4.51741		3.0076
							-2.94963	4.45125		3.42848
							-2.21842	5.37242		-8.02177
							-1.53046	4.51928		-7.48838
							1.28601	4.56152		-5.40397
							-2.90976	5.38375		-6.87358
							-3.4768	5.16325		3.18373
							-3.70984	5.38984		-8.9868
							-2.96112	4.41405		-8.8259
							1.22269	5.29575		-8.70599
							-3.69902	5.2285		-6.0592
							-2.99977	5.30615		9.06843
							-4.3573	5.06563		5.12471
							-2.82425	3.80775		3.15979
							-3.15403	4.86605		3.19938
							-3.02497	4.74704		4.66029
							-3.53589	4.94378		3.21087
							-2.89996	4.91458		3.82521
							-3.17503	5.23522		-7.39198
							-1.91476	5.2756		-8.91961
							-2.51468	3.96819		-7.98474
							1.26999	4.85661		4.27154
							-4.08667	5.33538		-9.09054
							1.28662	5.16144		3.57706
							-3.68272	4.62191		8.82616
							-2.48967	4.78736		-6.72216
							1.23317	4.67868		3.22643
							-3.04478	5.45825		8.54049
							-3.19428	5.0319		9.18254
							-2.54862	4.77964		-9.17541
							-2.7528	4.97811		3.28696
							-4.06357	5.1332		-5.59006
							-3.18622	5.48205		-9.05589
							-3.47721	4.30628		-6.07664
							-3.34659	5.5255		7.6029
							-1.70079	3.89611		-7.19314
							-2.56202	5.26521		9.11095
							1.41729	4.72095		3.4808
							-4.09669	5.2108		3.88445
							-3.52628	4.95058		4.16051
							-4.21366	4.83943		8.20463
							-2.87253	5.17423		-9.18555
							-1.5404	4.89588		3.36149
							-3.04869	5.26059		6.53338
							1.32542	5.08876		5.06872
							-3.67619	5.47254		3.36926
							-3.22049	5.59232		-9.10481
							1.41938	4.24874		7.9136
							-3.29433	5.14765		8.7393
							1.46682	5.22023		5.83321
							-2.40731	4.94738		5.45769
							-4.42604	5.63213		9.15075
							-4.17371	5.07511		4.66062
							-2.61579	5.18758		8.43719
							-4.83548	5.52196		8.93982
							-3.49221	4.11789		7.6174
							-3.00158	5.20184		3.62015
							-2.0365	5.3887		9.07327
							-3.01379	5.47985		9.0539
							1.33366	5.23233		3.45509
							-4.30829	5.08772		6.78335
							-3.95452	4.70072		8.05354
							1.32258	5.75742		4.4317
							-4.11911	5.21581		5.246
							1.87588	5.12134		4.11574
							-4.72678	5.72615		8.75505
							-3.16872	5.38929		7.32598
							-2.67848	4.3963		5.67359
							1.51797	5.44307		6.26467
							-4.5533	5.29672		8.9924
							-4.15833	4.97332		8.42537
							-3.88055	5.41764		8.80183
							-3.11056	5.73644		7.74791
							1.45732	5.62647		4.81558
							-3.68526	4.28199		3.49971
							1.35056	5.55654		3.60802
							1.40627	5.4389		4.03238
							2.76582	5.44332		5.98104
							-3.63812	5.69941		8.80506
							-2.72139	5.22622		6.66368
							-2.49622	5.64579		8.07419
							-4.86863	4.94738		8.54252
							-4.57687	5.62069		5.29865
							2.48954	5.91165		6.35173
							-3.90318	5.77663		4.34979
							-2.88091	5.09068		8.32883
							1.55134	5.82601		7.04918
							1.78823	5.48227		7.4269
							-2.48518	5.59903		8.55965
							-3.74524	5.24592		3.60327
							-4.44726	5.54783		7.73923
							3.04222	5.67865		4.70665
							1.59134	5.4526		5.86835
							-3.00123	5.8042		3.80014
							-3.37219	5.63769		8.29764
							-5.17882	4.47368		4.32361
							-4.90273	5.59754		6.1917
							-5.14548	5.87007		7.89614
							-5.0375	4.90933		7.06679
							1.60043	5.84013		5.47423
							-4.099	5.32668		4.9692
							-4.7671	5.91432		6.641
							-5.15335	4.91456		3.57998
							-3.93792	5.94323		7.54702
							1.38365	5.80416		7.99018
							2.10241	6.00913		4.0416
							3.10989	5.76548		4.51328
							-3.09338	5.76064		7.7008
							1.54153	6.09651		3.63903
							-4.57452	5.77677		4.96814
							-4.45411	5.79884		6.78912
							-4.36439	6.13744		5.55021
							3.06007	5.84078		6.09919
							-4.7994	5.86968		7.37935
							-4.15203	5.9198		3.82493
							-5.50042	6.10988		4.61891
							3.15955	5.95173		6.49031
							-2.6437	6.06948		5.08055
							-3.11184	5.97222		7.02807
							1.4969	6.02037		4.08078
							-3.85976	5.97747		5.69585
							1.58114	5.95074		6.07371
							2.43581	5.91017		6.63591
							-4.54097	5.88275		4.29189
							-4.99595	5.87877		6.21168
							-3.0328	5.826		4.51954
							3.12316	5.70716		5.78949
							3.15133	5.64125		4.90887
							3.0737	5.70554		5.32747
							1.66207	5.37596		-4.58728
							-2.49962	5.58631		-4.50475
							-4.36481	5.23652		-4.70547
							1.69392	5.48695		-4.48282
							-5.59752	5.14222		-4.99447
							1.50575	5.30575		-4.41993
							-2.56439	4.89656		-5.32502
							1.69539	5.14142		-5.10381
							-4.29986	5.05034		-4.99933
							-4.35909	4.97502		-4.30054
							-2.90011	4.64115		-5.71006
							1.68228	4.92672		-4.83803
							-2.88836	6.21404		-5.48457
							-5.32507	5.30363		-4.65155
							-5.07407	6.12646		4.1607
							1.90482	5.0429		-6.0995
							-5.84057	6.18894		-5.46367
							2.19771	5.66362		-5.19443
							-4.657	4.63871		-5.84115
							1.46028	6.04784		-4.91342
							-4.94938	5.85275		4.02915
							2.94205	5.4279		-6.47826
							-4.96821	5.85765		-4.65198
							-3.25947	5.84535		4.35642
							-3.72596	5.49356		-6.80613
							-5.51186	5.93149		-6.43364
							-6.11373	5.89741		3.92831
							-5.72538	5.94444		-6.00641
							-6.11056	5.12284		-4.98972
							1.60854	5.94993		-5.30936
							2.49879	6.34712		-6.23655
							3.38075	6.02048		-6.70198
							-4.5909	4.88341		-5.76776
							-6.11767	6.2827		-4.57081
							-5.81928	5.19238		-7.05157
							-4.6566	6.31593		4.23879
							-4.96577	5.48077		-5.59422
							1.6596	6.05707		-4.81632
							-2.68299	5.78969		-6.61472
							-5.29456	4.52444		3.98227
							1.67604	5.90884		-7.2376
							2.63657	6.40805		-6.47675
							3.27351	5.8082		-6.29169
							-4.7283	4.82348		-6.89552
							3.1589	5.84195		-4.60558
							1.73362	5.60757		-5.88495
							-6.26318	4.7369		-5.2076
							3.50759	5.95957		-6.99018
							-5.20237	6.49901		-6.72005
							2.58873	5.70269		-6.05333
							1.99625	5.76066		-7.34252
							-2.96318	6.49399		-5.64403
							3.45484	5.22832		4.41984
							-4.83523	4.98549		4.12712
							-4.97276	5.22541		4.03343
							-2.76675	6.13488		-4.87452
							1.83757	5.79334		-6.48294
							-5.053	5.81001		-7.04499
							-5.07373	4.35655		-6.70949
							-5.93765	6.38371		-7.35289
							3.22218	5.3484		-5.69616
							-5.50135	4.95179		-5.32946
							-6.60305	6.59186		-6.19031
							-4.59885	5.69917		-6.7769
							1.9699	5.99758		4.45489
							-5.33205	5.76998		-5.04248
							3.61962	4.80415		-4.60809
							-5.95352	6.52078		-6.41809
							2.84459	6.33605		-5.88007
							1.62536	5.09291		4.0941
							1.99531	5.56074		-6.9189
							-6.51065	4.76584		-7.25677
							1.91123	6.05666		4.15635
							3.49636	5.70992		-6.0545
							2.48149	5.8245		-6.64466
							-5.92359	5.33815		-6.29439
							1.77072	5.64699		-4.64179
							-3.59956	6.11367		-6.85155
							-5.72045	4.04469		-4.96765
							-6.83097	6.62537		-5.17729
							-5.47372	5.07726		-6.28659
							3.09822	6.63646		-5.92136
							-6.97667	5.101		7.03395
							-6.9904	4.80057		4.15966
							2.59454	5.56297		-4.69947
							3.01579	5.46388		-5.36328
							3.22127	6.52355		4.01516
							2.57203	5.60059		6.75405
							1.90228	4.57016		-5.85893
							1.88048	5.71812		4.34421
							-6.07884	4.87888		4.24857
							3.38556	6.33737		4.04129
							-4.37793	4.61337		-6.3177
							2.1584	4.39444		-5.41622
							-5.83317	6.39266		-5.49285
							3.80239	5.30799		-4.9396
							-5.28979	5.91207		6.70251
							-5.46294	4.66721		-4.58366
							2.78102	5.28502		4.20815
							-5.51558	5.96924		6.18111
							-6.68743	3.89358		6.36389
							3.01708	4.70831		5.42048
							2.74554	6.58554		4.01569
							-5.7341	4.96999		-4.74424
							2.21227	6.46002		-5.54306
							-6.62319	5.56104		4.04441
							-6.23218	6.70033		5.81477
							-5.618	5.2333		4.11334
							3.16503	6.64756		5.0385
							2.93727	5.71052		6.38198
							-7.11864	5.53795		-4.73759
							-7.31641	5.17138		4.02435
							3.78135	5.33865		4.26379
							3.88509	5.22574		3.97409
							2.57958	4.75845		3.8484
							1.98033	4.41681		4.11087
							2.03611	6.29648		3.92312
							-7.34168	6.20025		5.72251
							1.88717	5.07631		-3.96447
							-5.67392	6.68995		6.08077
							-6.38463	5.08047		4.99078
							2.23995	5.03521		5.32601
							-5.90664	5.18616		4.28646
							-7.53669	4.82304		3.97406
							3.70726	3.74796		3.65754
							-5.0824	5.67675		4.05398
							2.16575	5.55897		4.25448
							2.6627	5.9777		3.79734
							-6.10283	5.30313		3.89544
							2.86541	5.12824		3.66013
							-6.19821	6.64673		3.72491
							2.74203	6.44056		4.19307
							-6.7282	4.89708		3.62579
							-7.34616	4.98828		5.76676
							-4.61269	6.77236		5.92444
							3.55107	6.42603		3.1728
							2.22443	5.01734		4.72261
							3.28081	4.89562		3.24659
							-5.94918	4.54195		3.67093
							2.08096	6.76888		4.0375
							-4.12737	5.11897		5.04299
							3.02528	3.64595		3.69875
							2.44068	6.04935		3.00809
							-6.0179	6.64489		3.07077
							4.09544	4.81981		4.3005
							2.19928	6.14434		2.91919
							2.66313	4.90067		3.00759
							-7.33315	5.07293		5.76422
							-6.32972	6.82381		3.44408
							3.80551	6.70015		4.19442
							2.25018	5.49574		3.04287
							-6.97699	4.99595		5.95311
							2.76617	6.49611		4.1116
							3.40792	4.98492		5.30308
							3.05643	5.06308		3.57045
							2.43178	5.05651		2.96276
							3.31301	6.58413		3.13926
							-5.69968	5.83343		3.75657
							2.41296	4.48118		2.346
							-7.19389	5.88624		2.20793
							-7.94976	3.59653		2.85394
							-6.47226	5.08786		5.54989
							-6.3157	6.86357		4.91142
							-6.88931	5.29767		2.47167
							2.11163	6.69481		1.98031
							2.26221	6.23885		6.13389
							-7.84246	5.07693		3.30868
							-7.83183	4.74837		5.89718
							-5.20435	6.37037		3.90615
							2.84682	5.63094		3.46126
							-6.33121	4.84733		2.0446
							2.97877	4.8896		4.05583
							2.24148	5.17737		2.93134
							-6.49852	4.34089		3.97072
							-8.12632	6.05047		3.06206
							-6.94083	5.07016		1.87918
							2.52073	5.75111		2.52092
							4.16836	6.95598		4.49202
							3.6963	6.9228		4.0056
							-4.68938	3.58778		1.46841
							2.48519	5.14515		5.79071
							3.23368	6.73481		3.57239
							-7.71289	6.80657		5.33521
							2.92311	6.52661		6.45473
							-6.53026	5.43154		1.21585
							4.21064	4.75712		3.69397
							3.28867	4.9974		2.10382
							3.94645	5.82648		2.01555
							-8.16791	5.05762		1.39617
							2.38965	6.33574		6.30989
							-6.93874	5.2013		3.25132
							2.63369	4.24271		2.61472
							-6.73503	4.84693		1.53685
							2.77028	4.97748		2.31905
							4.37624	6.93056		1.09684
							2.86309	6.03726		3.22457
							-7.9406	5.12399		6.81849
							4.08069	3.65873		2.89951
							2.91628	7.04915		3.78194
							-7.67614	5.52776		3.41629
							-6.2645	6.81451		0.715615
							3.448	6.76762		4.88082
							2.47219	5.24436		4.12328
							4.29106	4.81734		5.6271
							-8.38629	5.07679		6.27778
							-6.83906	4.83694		3.77593
							2.42561	5.54709		7.2126
							-8.26523	6.17732		6.91879
							3.1374	5.13379		1.25813
							-7.59887	5.02641		3.49792
							7.02462	3.71755		2.83649
							-6.78238	6.14172		2.50318
							2.71542	6.6458		0.902158
							-5.84622	5.11008		0.849268
							3.73393	7.13641		2.0461
							4.47108	5.31744		3.02785
							-6.8425	6.97412		2.04394
							-7.42483	7.17256		2.68964
							2.66276	5.21186		5.53841
							3.18872	6.06894		5.06428
							-5.36161	7.04042		6.22051
							2.36922	5.28135		7.59212
							2.8093	5.23711		1.3442
							3.16563	4.99657		3.81439
							3.61971	5.34093		3.48449
							3.9433	6.4877		7.46996
							-8.14207	5.73733		1.22523
							-7.08595	5.47487		4.6566
							-7.63074	3.76425		3.03191
							-8.52404	7.18741		1.80294
							-7.19041	6.70667		3.3143
							3.0085	5.03165		3.54568
							2.58288	7.27513		2.40345
							-8.10219	7.24259		7.93988
							-7.50676	5.44388		6.92913
							3.07477	6.14908		7.96074
							2.55965	6.87738		3.08451
							3.02281	5.34885		7.47981
							-7.44295	6.11258		6.72055
							2.87141	5.1728		2.58135
							3.40288	5.19238		5.44635
							-8.40288	3.82062		4.12672
							-7.08044	5.46496		6.0855
							4.59852	7.16605		1.6772
							2.74974	5.36542		1.65371
							2.75016	7.19779		2.84697
							3.60378	5.81227		8.23028
							-4.92959	5.5111		4.95233
							2.83734	5.14706		7.96014
							3.18081	6.75463		3.2581
							4.14326	7.34898		1.85177
							2.92796	6.71102		2.43119
							-8.57448	7.10363		2.76872
							7.58316	6.18063		7.41216
							-6.63283	4.72584		2.30695
							4.35062	5.65224		3.36892
							-6.00032	5.50962		4.01092
							-8.03709	5.49334		8.37576
							-8.77323	5.29102		2.47571
							7.23392	7.42157		2.10214
							7.28929	3.92149		6.50342
							3.01692	7.33348		8.36001
							2.67411	5.46321		3.47734
							3.02052	6.73043		8.44459
							4.49727	6.23136		2.23196
							-8.76027	7.25165		8.33314
							3.69845	6.03536		5.45868
							-5.52716	5.36047		6.07634
							8.0643	5.80207		8.13676
							-7.45385	5.70953		7.27337
							-8.43896	5.46138		2.67678
							2.94419	5.54432		-3.17363
							2.64196	6.62172		4.29199
							3.16184	4.03684		2.48816
							4.6096	5.48934		-2.97462
							2.68191	7.4772		8.5134
							-8.0687	7.15365		5.04194
							-8.72424	5.63261		7.87758
							3.74666	6.59308		2.35225
							2.77537	5.96854		-2.76871
							3.14245	7.42346		8.34902
							3.12723	7.40615		3.65522
							7.84206	5.85414		-3.25841
							4.80463	7.14791		8.6776
							3.05885	5.3685		2.57637
							4.34362	6.56647		7.17708
							3.45323	5.63569		8.68671
							-6.40875	5.59967		4.55889
							4.13533	7.06031		8.55228
							3.0076	4.14126		3.13927
							3.42848	5.70395		-2.62784
							-8.02177	5.94305		5.79589
							-7.48838	7.47352		7.98677
							2.95179	5.78636		8.0642
							2.8645	6.69785		-8.77831
							8.09963	5.93422		6.8147
							3.69899	7.21886		-8.52068
							-5.40397	5.90643		8.59477
							4.95548	6.84453		4.72839
							3.20453	6.44184		4.13204
							-6.87358	5.70184		-2.64488
							3.18373	7.41556		-2.99867
							7.76947	4.23064		-2.71052
							7.61183	5.96219		-7.86537
							-8.9868	6.39232		-2.96554
							-8.8259	7.04106		-3.19389
							7.68966	7.46075		-3.96611
							-8.70599	5.37275		-8.84586
							3.25593	7.21255		-2.76171
							3.13501	5.96704		8.03453
							-6.0592	5.96119		-8.77413
							7.83771	5.7579		-2.86795
							9.06843	7.32264		-6.46628
							3.18964	7.01882		-5.75311
							3.11732	6.67323		7.49354
							-8.36877	4.31071		-5.16529
							7.70515	7.45061		-3.625
							5.12471	6.07985		-2.80855
							3.15979	6.47204		-7.96279
							8.51995	5.95136		-8.7069
							3.19938	7.36595		-8.75175
							2.98675	6.45636		-8.46452
							3.20633	7.30492		-2.96713
							4.66029	6.31571		-7.21236
							5.08231	5.84315		-5.0546
							3.21087	6.87955		-3.23523
							3.82521	6.14253		-8.27775
							3.86889	7.04455		6.70444
							3.16206	5.60115		-6.80672
							3.07212	4.41416		-2.92394
							8.08396	6.16988		7.3702
							-7.39198	7.41204		-6.25285
							3.12569	6.153		-8.84319
							-8.91961	7.046		-3.17556
							8.27516	6.9729		-4.67643
							5.17942	6.64119		-3.07619
							3.37681	6.02396		-3.67894
							7.91495	6.36759		-7.94561
							7.98318	7.24365		-4.24146
							-7.98474	6.31187		-8.71999
							3.23822	5.9703		-8.40446
							4.24107	7.09784		-8.69743
							4.27154	5.20943		7.7575
							-9.09054	6.297		5.76036
							3.4973	6.95097		-3.21521
							3.57706	4.44473		-3.52236
							8.82616	7.25988		-7.47881
							-6.72216	6.75861		6.60067
							4.66913	6.18797		-6.2927
							3.22643	6.80733		-8.32385
							4.60401	5.57884		-7.04348
							3.41673	6.48194		-8.67657
							8.3149	7.10358		-8.57284
							3.26174	7.22799		-8.56683
							8.54049	6.71649		-5.59533
							3.55585	6.13586		-3.20131
							8.26119	6.3803		-7.59254
							3.3098	4.45714		-8.09255
							9.18254	7.16078		-5.07517
							8.00674	6.98834		6.8943
							-9.17541	6.36967		5.7987
							5.1332	6.034		4.85117
							3.28696	6.19739		-3.24511
							-5.59006	6.8936		-4.77973
							4.05303	6.60687		-3.43803
							7.9677	7.0521		-7.09437
							8.70991	5.43531		-4.15338
							3.26581	6.86571		-8.47359
							3.20195	6.2966		-3.3063
							8.76056	6.72315		-7.93012
							3.41695	6.88382		-8.38188
							8.99887	4.49851		-7.1935
							8.20465	6.25934		-8.27351
							5.41813	6.14506		-7.77589
							9.05589	6.90629		-3.79729
							8.47965	5.97175		5.77447
							3.70693	6.54647		-5.9063
							3.32367	6.89859		4.18933
							3.39252	6.17915		-8.14639
							-6.07664	6.71472		-8.23725
							3.37301	5.25868		-7.92829
							7.6029	6.79876		-7.54536
							5.41196	6.05402		-7.85284
							3.28482	4.55752		-6.92361
							3.31961	6.1972		-5.76804
							8.10136	6.36442		-5.26305
							-7.19314	6.709		-5.7013
							9.11095	6.02687		-7.00508
							3.4808	6.66714		-3.45929
							3.72121	6.50214		-4.92574
							4.57982	6.42828		-7.48917
							3.88445	5.78804		-3.50882
							4.16051	6.05862		-8.02498
							8.02724	5.44526		-4.01716
							3.3207	6.54753		-4.07717
							3.32965	6.5379		-4.44223
							8.20463	6.03951		-6.66046
							4.44878	4.58626		-5.17009
							-9.18555	6.23848		-7.91435
							8.73723	6.02101		-7.4718
							3.82074	6.06516		-3.85274
							3.36149	6.32059		-7.76363
							6.53338	5.74607		-7.72164
							3.78698	5.51549		-4.92732
							5.06872	6.35886		-6.93332
							3.36926	6.21584		-6.21422
							8.26044	5.34122		-7.34991
							8.82715	6.00362		-7.76618
							5.29637	5.80361		-6.07541
							3.53081	6.24166		-4.33801
							9.10481	4.59902		-5.55066
							7.9136	5.63799		-7.2244
							3.70391	5.43852		-5.21039
							8.42912	5.86719		-4.28227
							8.7393	6.05179		-6.92594
							8.481	6.08889		-7.48073
							3.63188	5.73938		-6.70255
							8.17405	5.3704		-4.70096
							3.76166	5.22973		-7.62309
							8.98166	5.60673		-3.89309
							5.83321	5.92788		-7.27835
							3.94681	5.77469		-7.38574
							4.08757	4.62061		-5.84283
							5.45769	5.38719		-3.83693
							3.38773	5.84905		-5.25355
							9.15075	5.75475		-4.92198
							3.37325	5.4269		-7.43414
							3.70055	5.17703		-6.96329
							5.64945	5.02245		-7.43281
							9.38041	5.58358		-6.31628
							4.66062	5.48772		-6.83894
							8.43719	5.17274		-5.68613
							4.59687	5.13188		-6.33884
							3.3856	4.62144		-7.14022
							3.58132	5.58503		-4.59663
							8.75003	5.57007		-5.76224
							3.43059	5.35569		-4.34956
							4.59248	5.24357		-7.12282
							8.07107	5.17673		-7.30079
							5.11067	-5.04265		-5.54031
							8.93982	-4.89508		-7.27496
							7.6174	4.64393		-6.15319
							3.62015	5.3415		-5.53028
							3.03359	-5.09157		-7.03294
							3.27355	5.2588		-6.56956
							9.13297	5.11795		-6.6757
							3.92277	5.16885		-5.28151
							5.38397	5.10774		-4.36748
							9.07327	4.66014		-7.22218
							9.0539	5.16608		-6.86259
							8.23465	5.10517		-6.25605
							3.7281	-4.8965		-7.12307
							3.45119	-5.03522		-6.10922
							3.45509	-5.11608		-4.89884
							8.41866	5.0814		-6.63748
							5.00583	4.7139		-7.15977
							6.78335	5.11602		-6.90648
							4.0663	4.97125		-7.10684
							8.04649	-5.02187		-6.97707
							8.63903	4.81501		-5.26635
							8.05354	5.19257		-6.16744
							3.83658	5.1018		-6.52318
							4.4317	-5.23723		-7.09656
							8.80556	4.92977		-5.74396
							5.246	5.28057		-6.57155
							4.11574	-5.25548		-7.04283
							3.95038	5.08767		-6.92548
							8.75505	-5.42068		-4.93796
							7.32598	5.31225		-7.13064
							5.67359	-5.57859		-5.26423
							6.26467	5.59336		-6.7909
							3.85535	-5.73464		-6.86545
							8.9086	-5.96454		-5.62172
							4.15166	-5.9496		-6.3202
							8.50167	-6.3851		-7.03795
							3.54402			-7.08779
							4.1891			-6.66424
							3.47206			-6.94458
							8.98672			-6.91528
							8.02441			-7.09551
							8.15693			-5.46054
							3.22239			-6.15397
							3.59003			-6.50107
							4.25827			-7.01158
							5.71958			-6.75876
							3.74945			-6.98518
							8.9924			-5.94037
							8.42537			-6.83619
							4.85826			-6.27948
							3.62704			-6.56013
							3.90343
							8.03186
							9.65531
							4.16428
							8.80183
							8.15226
							8.33155
							3.57293
							7.74791
							4.08704
							5.40788
							3.64172
							4.81558
							3.49971
							3.60802
							8.82472
							8.38592
							4.7549
							2.82845
							4.03238
							4.31676
							4.17429
							4.18826
							3.56849
							8.45906
							5.98104
							8.80506
							6.66368
							-8.83198
							8.07419
							3.92493
							8.54252
							3.95121
							5.29865
							4.31861
							4.64663
							6.35173
							5.23729
							4.35485
							4.34979
							5.57594
							7.98827
							3.67277
							3.77333
							4.05725
							8.71526
							3.85622
							4.06679
							8.32883
							7.87951
							-9.30435
							5.69397
							2.74426
							7.04918
							8.48495
							8.00204
							4.31285
							3.6153
							4.15085
							3.83138
							9.79056
							3.32791
							7.90619
							7.4269
							8.55965
							4.80398
							3.60327
							5.08427
							7.73923
							-8.35
							4.48491
							4.70665
							5.86835
							8.03826
							4.56175
							8.43369
							8.1846
							3.32783
							4.37967
							2.96396
							7.83114
							-9.10938
							4.36096
							3.80014
							4.60873
							5.2894
							8.29764
							3.79795
							4.12004
							3.65381
							4.32361
							3.66062
							4.12192
							7.82177
							8.39464
							6.1917
							7.89614
							4.35906
							5.66188
							7.06679
							4.23261
							5.47423
							4.9692
							7.85321
							5.6404
							-8.751
							6.641
							4.77195
							2.71864
							8.08205
							7.76603
							-8.08851
							3.63227
							4.57582
							8.2021
							3.57998
							9.83435
							3.41448
							4.314
							4.74697
							4.02649
							7.74399
							7.72638
							7.54702
							-9.2179
							7.99018
							5.44113
							4.74651
							3.71205
							4.66171
							5.48504
							4.71202
							8.13754
							7.7286
							4.49205
							7.67162
							-7.90704
							4.47806
							4.39638
							7.77198
							3.62281
							3.82978
							4.0416
							4.51328
							-8.3168
							5.19354
							3.29127
							7.7008
							4.20258
							3.63903
							2.90482
							7.75068
							5.59107
							4.96814
							3.62907
							7.88692
							7.69934
							-8.89283
							3.57095
							6.78912
							-9.74116
							4.78474
							5.55021
							4.42527
							3.58597
							6.09919
							4.26002
							7.79622
							7.57465
							3.7143
							4.01833
							3.50021
							7.52896
							4.49839
							3.39679
							7.644
							-7.94107
							7.37935
							4.30679
							4.85976
							4.77347
							4.6672
							7.60957
							4.29876
							5.43522
							3.82493
							7.5588
							7.63442
							4.92303
							5.24145
							7.47688
							7.53252
							4.61891
							3.89713
							6.49031
							7.58914
							2.86024
							5.08055
							3.51635
							5.54834
							7.02807
							4.60438
							3.6244
							4.92635
							-8.60476
							7.38736
							-9.05112
							4.08078
							-9.59331
							-7.64601
							3.38802
							-8.25404
							5.69585
							4.21113
							4.46525
							7.34475
							7.42421
							3.77521
							3.89567
							7.47058
							5.49186
							4.85356
							4.57692
							3.40168
							3.59172
							4.64815
							-7.98491
							6.07371
							4.45594
							6.63591
							4.1399
							-7.4762
							4.33826
							4.29189
							4.32176
							4.90658
							-7.75627
							5.00328
							7.21078
							7.31431
							5.36514
							7.17692
							7.30186
							7.29032
							4.8645
							4.97928
							3.35954
							3.90184
							6.21168
							3.89456
							4.51954
							5.09295
							-8.5818
							5.11322
							4.52795
							5.51919
							-7.55867
							3.07141
							3.20477
							2.82413
							-9.43591
							5.78949
							4.90887
							4.56449
							7.0997
							3.91706
							3.40125
							5.32747
							7.1058
							4.26449
							7.14749
							3.27396
							4.28062
							6.92507
							-7.88752
							4.49418
							3.61966
							-7.36446
							-7.19648
							4.47806
							4.09593
							7.03541
							6.98655
							6.62863
							4.4351
							4.71965
							7.11298
							4.34123
							-7.49659
							3.43345
							5.32258
							5.20561
							5.45075
							4.82165
							3.09299
							7.0604
							4.87088
							5.03843
							4.29303
							-8.29013
							5.23152
							6.75383
							5.52831
							6.22878
							-7.09355
							3.80077
							3.33808
							6.70569
							6.9037
							6.70713
							4.52639
							3.92582
							3.25478
							6.85754
							-9.25698
							4.60926
							6.7447
							5.06408
							3.11002
							6.90279
							3.91744
							-7.62298
							3.54159
							6.85392
							3.02818
							4.1259
							4.88868
							-7.07452
							6.56644
							4.63876
							5.55033
							2.94622
							5.78425
							-6.81573
							6.96904
							4.86044
							4.87282
							6.52776
							4.31158
							4.91969
							-6.80026
							3.76163
							4.22922
							6.6606
							6.27469
							3.20677
							5.2439
							6.50691
							5.56812
							4.39997
							5.16726
							5.36588
							4.04362
							3.34187
							5.35922
							5.39476
							5.93386
							4.53109
							6.67409
							4.7001
							6.41211
							6.78799
							4.45601
							4.37362
							5.1974
							6.50016
							6.30864
							4.77883
							-7.13264
							3.36652
							3.97625
							3.18793
							-9.11842
							3.04759
							-8.45205
							4.22366
							-7.76488
							3.08912
							-6.53704
							-6.46787
							4.41576
							5.26822
							4.01113
							6.3055
							4.61128
							5.94784
							5.98907
							5.16864
							5.30566
							5.0959
							4.06286
							5.48077
							4.87142
							4.98187
							5.59473
							3.79316
							3.35245
							5.36305
							6.09101
							3.20053
							4.23586
							5.28034
							6.25806
							6.3064
							6.38603
							4.37292
							4.35516
							4.55762
							6.33949
							5.38515
							5.0741
							5.1905
							6.07087
							5.81341
							6.3224
							5.5431
							4.39485
							5.16831
							-7.33278
							4.72875
							3.59137
							4.45331
							3.28198
							5.8275
							5.86126
							-6.63313
							4.63453
							5.73891
							-9.02479
							3.75559
							6.21343
							3.74722
							5.301
							5.85777
							5.29144
							4.06843
							3.47143
							5.38827
							5.00195
							-6.08114
							4.30358
							5.57781
							5.51828
							4.21142
							5.28245
							3.31218
							4.51556
							5.57275
							5.4206
							5.94583
							4.17889
							4.8711
							-5.99895
							-6.0804
							5.02204
							5.6625
							5.31051
							4.79426
							5.07937
							6.1063
							5.43278
							5.00265
							5.71407
							4.08994
							6.18886
							5.17044
							5.95144
							4.79551
							-5.53539
							-7.73251
							3.56135
							4.51741
							4.45125
							5.44255
							5.64994
							5.37242
							4.51928
							5.56421
							4.56152
							-6.25494
							5.38375
							6.05765
							4.43587
							3.66935
							5.69274
							5.16325
							3.87771
							5.38984
							4.41405
							5.29575
							5.2285
							4.21513
							4.04121
							-5.78108
							-6.9037
							5.30615
							6.16149
							6.13213
							5.06563
							3.80775
							-8.85078
							4.51268
							4.86605
							5.12961
							4.74704
							4.75335
							-5.66056
							6.21642
							5.1961
							-4.67068
							5.13687
							-5.90229
							5.79538
							5.45891
							3.72907
							6.47899
							4.94378
							5.07144
							4.91458
							5.96906
							6.45307
							3.96502
							4.18655
							5.23522
							5.2756
							4.30111
							6.34826
							4.82595
							5.80912
							3.96819
							4.85661
							-6.22353
							5.05992
							4.46153
							5.33538
							5.16144
							-5.16464
							4.62191
							-5.56383
							3.99251
							6.15189
							4.78736
							4.72582
							5.76575
							4.67868
							5.45825
							5.10281
							5.97554
							5.0319
							4.77964
							-7.18407
							4.97811
							-8.06546
							5.1332
							5.48205
							4.30628
							5.48272
							4.32698
							5.5255
							5.59582
							4.54892
							-6.53087
							3.89611
							5.26521
							5.48651
							4.33316
							4.17929
							-8.73843
							4.72095
							4.81327
							5.75788
							6.35136
							4.85843
							-5.37618
							5.2108
							-4.54806
							6.15313
							5.40603
							4.94578
							-5.33208
							4.95058
							6.09567
							5.92788
							4.73581
							4.63956
							4.54505
							3.95275
							4.36943
							4.83943
							6.39183
							5.17423
							5.76717
							4.30484
							4.94298
							4.89588
							3.68754
							5.26059
							4.71199
							5.08876
							5.52943
							-5.52422
							5.47254
							5.59232
							4.24874
							5.14765
							5.22023
							-5.97467
							4.94738
							5.63213
							5.07511
							-5.93807
							-4.9204
							5.93153
							4.71298
							5.70595
							4.53134
							-6.58665
							4.52953
							5.18758
							5.62657
							5.52196
							5.75474
							5.34063
							5.39649
							5.71836
							6.09216
							4.11789
							4.57532
							5.41443
							5.20184
							6.47612
							-5.22854
							4.49602
							-3.60176
							4.6369
							6.50932
							-7.32044
							5.3887
							5.47985
							-8.72682
							-5.2816
							4.91857
							3.63063
							4.53441
							5.25957
							5.81968
							5.68412
							5.23233
							-5.16713
							5.59355
							5.79702
							5.62955
							5.08772
							4.70072
							5.75742
							5.21581
							5.12134
							4.37826
							4.10039
							5.72615
							4.66905
							5.38929
							-5.43021
							-5.5719
							4.3963
							2.99909
							6.22537
							-4.78267
							5.44307
							5.29672
							4.97332
							5.95852
							-5.88405
							5.41764
							5.29231
							5.73644
							5.62647
							6.00356
							5.82095
							5.5278
							-6.76219
							4.28199
							5.64711
							5.55654
							5.27914
							5.55434
							4.39236
							5.60484
							5.4389
							5.44332
							4.99231
							3.75657
							-3.55914
							5.69941
							6.68578
							4.6536
							-5.41508
							5.22622
							4.28988
							6.59106
							5.64579
							-7.86135
							4.75258
							2.536
							5.81197
							4.52063
							4.55678
							4.80458
							-5.27071
							-5.427
							4.94738
							5.62069
							-8.76047
							5.5934
							5.91165
							5.77663
							-6.1691
							5.09068
							-5.21958
							5.60556
							5.82601
							5.48227
							-6.12512
							4.08597
							-8.22928
							5.59903
							5.24592
							-5.7952
							4.54437
							4.99584
							-1.84934
							5.54783
							5.39154
							-4.69413
							5.67865
							5.4526
							5.8042
							4.73978
							4.32699
							6.53081
							5.74504
							5.89995
							5.63769
							4.47368
							5.02288
							5.81748
							1.90217
							-4.12975
							-7.64549
							5.59754
							5.87007
							4.90933
							5.84013
							6.39225
							5.33528
							6.86929
							5.25891
							5.32668
							5.91432
							-5.61627
							5.24242
							5.66138
							-6.71658
							4.91456
							-4.29845
							7.01917
							6.88721
							7.05734
							-6.8942
							6.70853
							6.45945
							-6.64389
							-6.48887
							6.01959
							5.95802
							5.87667
							5.81475
							-6.16347
							5.76193
							-6.08533
							5.94323
							5.80416
							6.00913
							5.76548
							5.76064
							5.78475
							6.09651
							5.77677
							5.79884
							6.13744
							5.84078
							5.86968
							5.9198
							6.10988
							-5.87181
							5.95173
							5.79534
							6.06948
							5.97222
							6.02037
							-5.3554
							5.37177
							-5.34192
							5.97747
							5.74499
							5.95074
							5.73514
							5.91017
							5.88275
							5.00881
							5.05266
							5.87877
							3.80194
							5.826
							5.49422
							5.64769
							5.03252
							5.70716
							5.03326
							5.64125
							5.12582
							5.10147
							5.70554
							5.09056
							5.37596
							5.58631
							5.43286
							2.14472
							5.23652
							5.48695
							5.14222
							5.26945
							-1.46297
							5.30575
							5.08263
							4.89656
							5.01046
							5.14142
							5.05034
							4.97502
							4.79762
							4.8009
							4.90454
							4.86278
							4.80709
							4.64115
							-2.37814
							-4.03802
							-4.81775
							-4.18837
							-4.43002
							4.26678
							4.18613
							-4.97445
							3.00164
							-5.20855
							4.70038
							3.67053
							-4.89352
							4.80591
							4.6832
							-4.90878
							-5.42621
							-5.49566
							-5.51708
							-5.69253
							-5.9419
							-6.12938
							-6.23863
							-6.52865
							-6.74002
							-7.0323
							-7.39778
							-7.6212
							-8.19675
							-8.52869
							-8.84594
							-4.27173
							4.92672
							-7.07954
							5.89315
							4.87487
							-5.97129
							6.21404
							5.30363
							4.88097
							7.21468
							4.87289
							6.68769
							6.12646
							5.0429
							6.18894
							5.66362
							-7.90965
							-4.09676
							-4.08561
							5.75598
							5.07334
							4.63871
							6.04784
							5.14339
							-5.8436
							-6.95304
							4.95104
							4.7266
							5.85275
							5.4279
							5.85765
							-4.31567
							5.44197
							5.84535
							-4.92474
							-5.03653
							4.94279
							-6.33201
							5.49356
							5.93149
							-8.46048
							4.72242
							-6.5471
							5.89741
							5.94444
							-10.1282
							-5.6807
							5.12284
							-6.86594
							5.94993
							6.34712
							4.68567
							-8.82399
							6.02048
							4.88341
							-5.25511
							-5.95756
							4.69622
							-4.81019
							5.35058
							-6.04567
							-5.6877
							4.68713
							-8.28573
							6.2827
							7.08045
							4.51155
							5.19238
							-6.25537
							4.57883
							-7.30036
							6.31593
							-3.6635
							-8.00555
							4.99348
							5.48077
							6.05707
							-12.8135
							5.17274
							-9.55425
							6.01201
							5.78969
							-4.74767
							4.52444
							-7.65207
							-5.5968
							6.32466
							4.71229
							5.90884
							6.40805
							5.92121
							5.8082
							-6.96313
							-6.47074
							4.82348
							5.84195
							5.60757
							-4.34039
							-6.93573
							-2.87406
							4.7369
							-6.69019
							-4.91399
							5.95957
							4.51839
							6.49901
							5.33387
							5.51834
							5.70269
							5.76066
							6.49399
							5.22832
							4.98549
							-5.74817
							-12.7508
							-7.74285
							-6.07791
							5.22541
							-4.60541
							-6.12176
							5.28068
							4.4061
							-10.0505
							4.88928
							-6.49983
							-8.71349
							6.13488
							5.79334
							-8.19674
							-7.1802
							5.38337
							-4.17106
							5.48695
							-6.37793
							-7.00533
							5.81001
							5.99407
							4.81313
							4.35655
							-6.58343
							-9.13565
							-5.43747
[truncated: 1,603 more rows]

## Sheet: Blad3
	mean	std	95low	95up	surface		face	forehead	nose	cheeks	upper lip	chin
face	1.88178	3.73649	-5.84062	6.48719	17182		2.7911	3.8112	3.00534	2.82659	1.43126	-6.06127
forehead	3.20297	1.04099	1.71893	5.24466	3926		2.87499	3.82054	3.15915	2.87765	1.70461	-6.03722
nose	1.9566	2.45293	-3.76874	4.15139	916		2.92459	3.60686	3.24643	2.78369	1.5424	-6.02682
cheeks	1.5891	3.71071	-4.72765	6.37325	4698		2.71486	3.67235	2.91082	2.80931	2.2047	-6.08379
upper lip	-1.1347	3.73477	-8.07152	3.14938	619		2.82839	3.86994	3.16837	2.75023	1.84648	-6.14782
chin	-1.22889	6.00526	-6.35571	6.84094	635		3.07242	3.45353	3.69411	2.87674	2.80315	-6.21552
							2.78786	3.92651	3.59674	2.77177	2.1973	-5.98798
							2.724	3.54459	3.07503	2.921	1.60668	-6.24934
							2.68961	4.01871	2.69383	2.92158	1.50797	-5.93679
							3.24242	3.31528	3.71058	2.73753	2.03848	-5.94915
							2.84029	3.70097	3.80464	2.8721	1.71742	-6.3275
							2.77077	4.14376	2.91168	2.95912	3.07993	-5.99107
							2.79058	3.34782	3.29089	2.77283	2.43521	-5.83994
							2.78858	3.78348	2.74967	3.00543	2.64445	-6.28416
							2.69591	3.47842	3.81327	2.82628	1.4774	-5.84165
							2.84375	4.23247	2.79457	2.98245	1.92979	-5.80183
							2.70038	3.20673	3.33176	3.01904	2.64073	-6.00317
							2.75688	3.98887	3.08011	2.8828	2.27561	-6.30709
							3.33435	3.56846	3.79506	3.0748	1.55959	-5.79207
							3.08984	4.3286	3.54814	2.79806	1.69622	-5.66766
							2.74403	3.72051	4.15119	2.79935	2.03506	-5.66874
							2.78663	3.27968	3.51052	2.95034	3.00534	-5.66451
							2.81241	3.15442	3.81016	2.69268	2.45877	-5.94227
							2.69311	3.0664	2.56946	2.80802	1.94326	-6.29362
							3.03494	3.31284	2.80536	3.08405	1.66915	-5.63469
							2.78087	3.66842	2.93433	3.15652	1.54381	-5.68525
							2.89466	4.36552	2.99846	2.99522	1.60805	-5.60283
							2.73708	3.8679	4.05773	2.92331	2.91082	-6.22862
							2.79813	3.32935	3.43075	2.85738	2.22331	-6.18105
							2.78407	3.18125	3.72268	3.11545	2.13038	-5.90042
							2.71306	3.41785	2.43935	2.85522	2.69383	-5.67995
							3.40499	3.09083	3.53266	2.88148	2.02505	-5.80805
							2.82659	3.54868	4.02868	3.17661	1.56777	-6.12429
							2.83451	4.36491	3.07808	3.23844	2.45019	-5.73901
							2.87765	2.95547	2.52302	3.05951	1.78907	-5.60651
							3.18685	3.01805	2.73769	2.83209	2.40063	-6.13153
							2.78369	3.02834	3.62125	2.74646	2.74967	-5.98943
							3.20181	3.08683	2.30311	2.91479	2.25551	-5.92
							2.98816	3.15739	3.8012	3.05617	2.7598	-6.23021
							2.7108	3.42893	2.5209	3.26028	1.63965	-5.90392
							2.77935	3.3109	3.37712	2.92132	1.9531	-5.81631
							2.73457	4.31072	3.09639	3.26766	2.93433	-5.94863
							2.80931	3.89704	4.05955	2.64704	2.74682	5.74263
							2.75023	2.95557	3.84653	2.8946	2.33224	-6.24662
							2.71282	3.58542	2.36947	3.37341	3.15672	-5.89799
							2.97255	3.18442	2.44206	2.91281	1.74384	-6.28027
							3.14016	2.8911	2.44567	3.49941	3.20373	-6.11159
							2.87674	2.90636	2.76315	3.01783	2.19138	-6.10666
							2.85815	2.99988	2.466	2.90039	3.8012	-6.03173
							2.80497	3.31447	2.62857	-3.31754	2.61627	-6.14973
							3.50933	3.15148	3.33996	2.95883	3.58088	5.99133
							3.15964	2.91152	2.79077	3.5043	-2.15467	-6.16938
							2.77177	4.23742	2.90978	-3.20719	4.15313	-5.63035
							2.921	2.98325	4.08114	2.61336	2.92209	-6.22403
							2.98895	2.99299	4.15313	3.19548	-2.57953	-6.17742
							3.45153	2.87218	3.86575	2.71261	-2.54735	-6.29583
							2.92158	2.84584	2.2868	3.69026	3.12737	-6.06191
							2.73753	3.63759	3.40189	3.46032	-2.86427	6.33833
							2.72096	2.87954	2.30894	-2.92483	3.26477	-5.83176
							2.66356	3.02412	3.76935	3.64346	-2.77634	6.20184
							2.8721	3.10418	2.53189	-2.97157	2.81627	-6.26627
							2.95912	3.2428	4.19604	-3.6457	-2.70589	-5.48892
							3.21387	2.86867	2.48355	-3.21604	-4.70361	-6.35141
							3.19405	2.82775	2.43384	-3.57264	3.63708	-6.15024
							2.77283	4.17174	2.77814	-3.0443	-4.80345	-6.51905
							2.83902	2.84194	2.93488	3.03929	-2.99164	-5.9915
							3.36263	2.77413	2.74271	2.508	-2.84993	-6.43734
							2.97324	2.77388	2.14475	-3.0135	3.05277	-5.43022
							3.00543	3.64283	2.72671	-3.55356	-2.75165	-5.61416
							2.67434	2.70816	3.20842	-3.89727	2.74727	-5.66446
							2.74419	2.8005	2.09182	2.45695	2.84193	-5.87802
							2.82628	2.83116	3.26477	-3.88163	2.8314	-6.08384
							2.98245	2.82067	2.39655	2.78952	2.78923	-6.22547
							3.01904	2.84936	3.60676	-3.23318	-2.93623	-6.31988
							2.8828	2.68059	4.08116	-3.92748	-2.85663	-6.46185
							2.79504	3.08793	3.6891	3.83673	-3.71369	-6.63835
							3.67663	2.58887	3.74135	2.60234	2.94474	6.64293
							3.08221	4.10805	3.05328	-3.02985	-8.26486	6.68963
							3.0748	2.68822	3.63269	-3.49977	-2.97907	6.73113
							3.67142	2.63995	3.64303	3.27585	-8.87964	6.63015
							2.79806	2.51126	3.54533	-3.0975	-8.10393	6.51795
							2.79935	3.51129	3.33363	3.53566	-8.68779	6.42064
							2.95034	2.70882	3.83842	-3.94716	-2.75145	6.72348
							2.88593	2.78984	4.151	-4.09393	-8.69778	-5.94432
							2.69268	2.47604	2.83221	-3.17463	-4.74156	6.83913
							3.46712	2.66621	-2.74789	-3.4044	-7.83532	-6.20888
							2.6876	2.4423	4.10384	2.99018	-2.7196	6.70964
							3.05997	3.09023	4.12722	-4.19253	-8.47129	-5.42879
							2.80802	2.47865	4.10126	-3.89664	-8.34914	-6.64967
							3.44485	2.44304	4.03994	2.38873	-7.97431	6.60629
							3.08405	2.55089	2.29925	-3.67209	-6.85312	-5.6346
							3.05597	4.07148	3.99049	-4.19347	-7.45122	6.88047
							3.15652	2.68663	2.20656	-3.07571	-7.2686	-5.88456
							2.67573	2.31197	4.05446	3.90403	-4.19026	6.97886
							2.99522	3.62303	1.96484	2.76146	-7.59405	-6.59431
							2.92331	2.23344	4.05405	2.52423	-7.38522	-6.20351
							2.85738	2.5662	1.87689	-3.1147	-6.60054	-5.44128
							3.11545	2.29828	3.50027	-4.18078	-5.04627	-5.77142
							3.13945	2.27794	3.05277	2.21229	-5.01014	6.64074
							3.79538	2.74814	1.89039	-4.31274	-4.03682	7.05403
							2.86635	2.32527	2.05179	3.06335	-4.3693	-5.54487
							2.62094	2.6313	2.18353	2.19789	-4.72062	6.99323
							2.85522	2.95596	2.39375	-3.39561	-4.79727	-6.62889
							2.88148	4.02289	2.45502	-3.08248	-3.4242	-6.12283
							3.17661	2.43315	3.12638	3.24221	-3.77462	-5.48658
							3.23844	2.08245	2.75442	3.51092	-3.08861	-5.67628
							3.05951	2.41762	2.76414	-4.10985	-2.80826	6.66713
							3.22955	2.0387	2.91181	-4.39749	2.63652	6.88802
							2.83209	3.454	2.86091	-3.64022	-4.0592	6.87521
							3.91675	2.10593	2.79808	-3.9193	-3.66426	6.98184
							3.29043	2.05622	3.14125	-4.24972	-3.26243	-5.90915
							2.74646	2.55384	4.23805	-4.44217	-2.96757	6.62899
							2.61195	2.44468	-3.63881	-2.99111	-2.78603	-6.25337
							2.91479	2.63379	4.21645	3.64723	2.57389	-5.56931
							3.61322	2.21153	3.86256	-2.9551	-4.01086	6.56278
							3.05617	1.88437	2.27508	2.41614	-3.12883	6.68073
							3.26028	2.03186	2.94474	-4.52003	-3.70059	-5.91225
							2.92132	4.05237	1.7612	-4.07295	-2.69118	6.42132
							3.26766	2.87963	-3.12167	-3.30145	-2.56772	6.69444
							2.64704	2.51113	2.76698	-4.54424	-2.92576	6.05331
							2.8946	1.8694	1.92545	-3.73704	-3.43331	5.74662
							3.37341	2.09714	-2.57791	2.1041	-3.96988	5.67043
							3.79216	1.83168	3.07068	-4.37893	-2.73911	6.22594
							2.65146	1.9999	2.9129	2.65061	-3.96082	6.26865
							3.7614	3.36517	-1.92659	-4.30467	-3.86157	6.33483
							3.34567	1.72079	2.28799	2.16792	-3.93322	5.76986
							2.90734	2.31851	-4.14074	3.0379	-3.70118	5.97216
							2.91281	2.64318	2.62109	1.9634	-3.27727	6.12777
							3.49941	2.20983	-3.73333	-2.78417	-2.85907	6.03002
							3.01783	4.0854	2.14401	-2.78046	-4.13102	5.85838
							2.90039	1.6456	4.35309	-3.00324	-3.13854	6.0324
							2.63314	2.06204	1.61244	3.22536	-4.07828	5.88304
							-3.31754	3.58949	4.48779	-4.66644	-3.42326	5.96401
							2.95883	2.45585	2.75145	-3.28618	-3.9214	5.92479
							3.08059	2.4478	3.96419	2.02642	-3.67974	5.59618
							3.5043	2.95949	-2.49247	3.55899		5.96549
							3.36747	1.71398	3.01415	-4.62936		5.78133
							-4.13447	1.82812	-3.11608	-4.16236		5.95597
							-3.20719	2.3605	2.80539	-4.4185		6.02197
							2.61336	1.56564	-1.63995	-4.36235		5.89401
							2.7799	1.49323	-2.11096	-3.75535		5.44024
							3.19548	2.46739	1.70089	-4.00167		6.04475
							-3.70406	2.22003	2.27471	-2.73655		5.69867
							2.50754	2.06353	2.11734	-4.55656		6.0475
							-3.27239	2.00874	-3.76809	2.28964		5.99817
							2.71261	4.15509	-4.27209	2.08047		5.91743
							3.69026	3.47536	4.29985	-2.58985		5.42349
							3.46032	1.50735	-2.87977	-3.10782		5.5924
							-2.92483	1.81624	1.53396	-4.04817		5.77502
							3.64346	2.73338	-2.7196	-4.78379
							3.8112	2.32321	2.15282	-4.6648
							3.61092	1.55251	4.68614	2.76827
							-2.97157	1.71871	-1.6655	-4.72071
							-3.6457	3.01064	1.85875	2.41746
							-3.21604	2.30422	-2.20592	1.87054
							-3.57264	2.21307	-3.94216	3.08259
							-3.0443	1.38634	3.29067	1.9117
							2.84728	2.01101	2.1515	-4.38247
							2.96928	2.04645	-3.16563	-4.06425
							2.52967	4.22259	4.33759	-2.6509
							-3.60189	1.38604	-4.22918	1.82307
							3.03929	1.53753	-1.7482	-4.35315
							2.508	2.55652	-4.19026	-2.43324
							-3.0135	2.1973	1.59821	-3.1945
							-3.55356	2.07649	1.88053	2.13152
							-3.28911	1.83063	-3.33678	3.3945
							3.43098	1.6884	-2.29881	-4.5376
							-3.89727	3.68446	-4.07006	1.93066
							3.82054	2.31377	3.85108	-4.8015
							3.60686	2.88234	-4.2243	-4.6313
							2.45695	3.20061	1.63334	-3.63809
							-3.88163	1.63919	-3.52432	-4.78398
							2.78952	4.27843	1.76145	1.7529
							-3.23318	2.04002	-3.11062	2.41964
							-3.92748	2.07578	-5.01014	-3.5247
							3.83673	1.5529	1.71725	-2.28909
							-4.27159	1.57676	1.65522	-3.91242
							2.6487	1.84134	-3.48284	-4.29386
							2.60234	2.88094	-2.05517	1.63465
							-3.02985	1.88183	-3.77462	-4.48028
							-3.49977	3.16377	1.66784	-2.54798
							3.21533	3.56653	2.33359	1.63515
							3.27585	2.52212	2.96404	-4.04658
							-3.0975	1.62122	1.73359	2.74978
							-3.98808	1.72754	2.63652	1.81946
							3.02223	4.33133	1.92328	1.95339
							3.67235	1.79248	2.26722	-4.78721
							3.53566	1.95023	2.57389	1.75666
							-3.94716	1.61982		1.68701
							3.86994	1.59202		1.66701
							-4.09393	3.80423		2.93769
							-3.17463	3.0551		-3.37483
							3.45353	1.75564		-3.05658
							-3.4044	2.8106		-4.65177
							2.99018	2.32776		-4.54056
							-3.32005	1.67973		-3.69606
							-4.19253	3.36301		-2.19564
							-3.89664	1.71462		-4.75818
							2.38873	2.01426		-4.10268
							-3.67209	2.55329		1.59133
							-4.19347	1.63146		2.27268
							-3.07571	4.4573		-4.40439
							3.92651	1.7117		-3.43457
							2.85744	1.83015		-3.99915
							3.90403	3.79068		-4.70045
							-3.61556	1.65501		1.68649
							2.76146	1.7517		-3.37943
							2.52423	1.77402		1.64586
							-3.1147	1.63308		-2.82596
							-3.89429	3.07021		-2.27164
							-4.18078	3.49192		1.59986
							2.21229	1.82444		1.39899
							3.54459	1.78605		-4.74591
							4.01871	2.33184		-3.86407
							-4.29502	4.51253		-2.79698
							-4.31274	2.73028		1.55528
							3.06335	1.74474		1.40783
							3.31528	1.76337		-3.45341
							2.19789	3.776		1.57944
							3.70097	1.6923		2.10349
							2.40888	4.12688		-4.76929
							2.61767	1.62177		-4.57435
							-3.39561	2.11375		-4.47254
							-3.08248	3.33032		-4.19377
							2.63911	2.50864		-4.24748
							3.24221	1.87256		1.6435
							3.51092	1.91026		-3.80349
							-4.10985	1.74124		-2.98566
							-4.39749	1.58409		-2.42683
							4.14376	2.32686		-4.67796
							-3.64022	1.73023		1.14803
							3.007	3.16569		-2.17762
							-3.9193	1.73314		-3.23958
							-4.24972	4.55945		-3.49199
							-4.44217	1.90524		1.52819
							-3.23098	3.89371		1.14311
							3.12294	3.52088		-4.8059
							3.34782	1.75406		1.51078
							-3.92164	2.036		-2.36825
							3.78348	1.58065		1.03308
							-2.99111	1.70076		1.49263
							3.47842	2.51314		-4.24748
							4.23247	2.82714		-4.23605
							-3.57894	1.79721		-2.82737
							3.20673	3.27532		-2.85388
							2.71307	3.06833		1.17288
							3.64723	4.68702		1.54491
							-2.9551	1.61608		-4.74577
							2.41614	3.65042		-3.82093
							-4.52003	1.77795		-4.52822
							-4.07295	1.75892		1.20178
							-3.30145	1.85947		-4.90435
							-4.54424	1.79621		-4.67537
							-3.73704	1.71682		1.5046
							2.1041	2.27947		-3.78728
							3.98887	1.4965		-4.90247
							-4.37893	3.86471		-3.27533
							2.65061	2.8819		1.00985
							2.90996	3.12291		1.48811
							-4.30467	1.75619		1.41262
							3.56846	2.56174		-2.32681
							-4.20863	1.66148		-3.34199
							4.3286	1.94478		-4.41205
							-3.09504	3.46424		-1.73406
							3.72051	4.76522		-4.35895
							2.16792	1.59098		1.38201
							3.0379	1.86314		-3.97044
							3.27968	1.56739		0.819768
							2.54481	1.36373		-3.7662
							1.9634	4.10252		-5.07526
							-2.78417	1.67904		-4.74046
							-2.78046	1.6061		-4.9443
							-3.00324	1.75996		1.13093
							3.22536	3.18474		0.811907
							-4.66644	2.24027		1.29862
							3.15442	3.74704		-2.84425
							3.0664	2.92419		1.11024
							-3.28618	4.77532		-1.85598
							2.29411	1.99219		1.02563
							3.31284	3.48637		-3.49029
							2.02642	2.47011		1.42703
							2.98732	1.46323		-2.23121
							3.55899	1.73051		-4.79902
							-3.73326	4.37832		-4.26421
							-4.62936	2.01654		1.45154
							-4.16236	1.79798		-5.18459
							3.66842	1.80437		-5.15915
							4.36552	1.43777		-4.46255
							-4.4185	4.00593		-4.95281
							2.65602	1.68426		-1.29676
							-4.36235	1.39921		1.43517
							-3.20994	3.24874		1.43668
							-3.75535	3.08856		1.25386
							-4.00167	2.21228		-4.70264
							-2.73655	1.96378		-3.91572
							3.8679	4.80038		0.859921
							-4.55656	2.53721		0.928276
							3.32935	2.87565		0.609834
							2.28964	3.65612		1.07327
							3.18125	2.10635		1.42981
							-2.84606	1.70408		-5.247
							2.90475	4.26703		-2.15724
							2.08047	1.53736		0.67746
							-2.58985	1.64885		-2.92992
							3.41785	1.98324		1.5053
							3.09083	1.68679		-1.41768
							-3.10782	1.95524		-5.10239
							2.74564	1.87061		-5.39967
							-3.97652	2.17909		-4.23397
							3.54868	3.42343		-5.50966
							-4.04817	2.2476		-0.948706
							4.36491	3.85569		1.49125
							-4.78379	2.62232		-4.97986
							-4.6648	2.19581		0.951717
							2.95547	4.80826		0.705048
							3.01805	1.8115		-3.6801
							2.76827	4.10868		1.52523
							-4.72071	3.67296		1.22346
							2.41746	3.27225		-4.65473
							-3.14947	2.16867		-2.04914
							1.87054	2.26831		1.53331
							2.3028	1.76758		1.56786
							-3.4448	2.14692		-5.61762
							3.08259	2.28468		1.53618
							1.9117	1.70463		-5.46753
							-4.38247	2.30383		-1.51229
							-4.06425	2.87171		0.812747
							-2.6509	2.33506		-5.33978
							1.82307	2.12868		-5.70697
							-4.35315	1.92341		-3.01804
							2.52676	1.98532		-1.06736
							-2.43324	3.20726		0.804808
							3.02834	3.4941		1.59505
							3.08683	4.84206		1.32236
							3.15739	3.78857		1.14002
							-3.1945	2.60576		-3.74138
							2.13152	4.12818		-5.66319
							3.42893	2.36929		1.56872
							2.811	2.25287		-5.79234
							1.95656	2.04991		-2.56129
							3.3945	2.94409		1.53409
							-4.5376	1.98785		1.50577
							-2.48503	2.15628		-5.93017
							3.3109	3.25993		-1.92075
							4.31072	2.32983		0.923405
							1.93066	2.49394		-4.4315
							-4.8015	1.75332		-1.39282
							3.89704	1.83127		-0.970303
							-4.6313	1.66247		-3.17385
							2.95557	3.57092		-5.37686
							-3.63809	4.91084		1.61034
							3.58542	2.46568		1.73849
							3.18442	2.5021		1.19324
							-4.78398	2.5603		-4.8446
							2.8911	3.87151		0.881042
							-2.69829	2.95843		-6.09514
							1.7529	2.3833		-6.06415
							2.41964	3.32373		1.60043
							-3.13607	2.08921		1.56666
							2.8453	4.32288		-1.07612
							-3.5247	2.53155		1.55248
							-3.67451	2.21335		1.7588
							-2.21121	2.06214		1.82242
							2.90636	2.69634		-2.76006
							2.99988	3.6868		-1.98545
							3.31447	1.85303		1.07573
							-2.28909	2.54757		-1.32783
							-3.91242	2.60881		1.57064
							-4.29386	2.84369		-5.12876
							1.63465	1.91587		-4.3979
							3.15148	2.28271		-6.30605
							-4.48028	2.69896		1.01192
							-2.54798	3.02512		-5.69359
							-3.38847	2.56291		1.34577
							1.63515	4.88517		1.75657
							2.1403	3.43422		1.8958
							-2.07598	2.41783		1.61602
							-4.04658	2.57364		1.68434
							2.74978	1.9013		1.88298
							1.81946	2.75276		-1.6255
							2.91152	3.01266		-6.37173
							1.95339	4.37118		-2.33313
							4.23742	2.54509		1.88284
							-4.78721	2.25172		-4.93277
							2.98325	2.74641		2.00756
							-2.704	1.89895		-3.96473
							1.75666	2.51261		-1.15681
							2.99299	2.07242		1.86264
							1.68701	2.31871		-3.2605
							1.778	2.64406		-5.90134
							1.66701	2.31078		-5.3999
							2.80281	2.71535		1.82852
							-2.95937	2.87236		1.49002
							2.93769	2.80309		-6.33599
							-3.37483	3.93603		1.35606
							-3.05658	2.56304		-1.6663
							2.87218	4.79573		-1.33402
							2.84584	1.98848		-4.80414
							3.63759	3.61028		2.04081
							-4.65177	2.92775		2.13759
							-2.29971	1.76693		2.11542
							-4.54056	1.98316		-2.46317
							2.78065	3.26191		-5.77327
							2.87954	2.72534		1.9966
							2.37725	2.92141		1.30479
							3.02412	2.94295		1.95785
							-3.69606	2.058		1.93661
							-2.19564	2.28017		-6.15065
							3.10418	4.05864		-1.98909
							-1.89072	2.69008		-3.53002
							3.2428	1.71127		1.70353
							2.86867	2.223		1.91332
							-4.75818	2.54502		-5.24626
							-4.10268	2.89769		2.20177
							1.59133	3.02673		-2.82896
							-3.33185	2.89937		-4.15103
							-1.91483	4.74584		-1.58147
							2.52428	2.61781		2.15358
							2.82775	2.91557		-5.78014
							2.27268	1.83344		-4.73459
							4.17174	3.06405		2.04656
							-4.40439	2.9484		1.43951
							-3.43457	3.70133		-2.12466
							2.84194	2.34008		2.36184
							-3.99915	2.18979		2.21467
							2.77413	3.28678		2.35132
							-4.70045	2.15796		-3.62663
							1.79419	1.71901		-1.40912
							1.68649	4.15717		2.11868
							2.77388	3.16035		1.77801
							-2.93239	1.97406		-5.24064
							-2.55446	2.79077		-2.76201
							-3.37943	2.48171		-3.97867
							1.64586	2.55741		-1.66024
							3.64283	2.82127		2.46168
							-2.82596	4.75068		2.05793
							2.70816	3.12244		2.16579
							2.8005	2.98382		2.43831
							2.83116	3.19491		2.18861
							-2.27164	1.95031		-4.55755
							1.59986	3.16167		1.78664
							1.39899	2.84323		-2.0977
							-4.74591	2.93488		-3.21342
							-3.86407	1.88995		2.46416
							2.82067	2.15531		2.02258
							-2.79698	2.70805		2.52544
							1.55528	3.14939		-2.61949
							2.84936	2.999		1.63307
							2.68059	2.11438		-1.52327
							1.40783	2.01263		-3.75693
							-1.7768	3.20547		2.03708
							-3.45341	2.26554		-1.64279
							2.70968	2.4954		2.60041
							3.08793	3.29748		2.4268
							1.57944	3.21882		2.37647
							2.10349	2.87386		-2.95001
							-4.76929	4.79459		2.62669
							-4.57435	3.36372		2.36022
							-4.47254	2.61668		-1.8535
							-4.19377	3.84637		1.78536
							2.58887	1.86914		2.67405
							-1.91279	3.25718		2.6844
							-4.24748	1.92657		2.13516
							-2.97592	3.05328		2.0545
							-1.60891	1.89228		1.5746
							4.10805	2.0187		-2.20095
							2.68822	1.91048		2.5766
							2.10675	2.13601		2.70196
							1.6435	2.16928		1.68727
							2.63995	2.01798		2.28231
							-3.80349	2.35395		2.78844
							-2.31347	2.41696		2.09459
							-2.98566	2.16139		2.76745
							2.73354	2.56608		2.59175
							-2.62414	2.61637		1.56414
							-2.42683	2.73362		2.55518
							-4.67796	2.39952		2.72801
							2.49133	2.8118		2.33191
							1.14803	2.43847		2.86633
							1.51216	2.9598		1.79038
							2.51126	2.50189		2.65073
							-2.17762	3.14514		2.7779
							3.51129	3.25534		2.58956
							2.70882	2.65416		2.11775
							-3.23958	2.70793		2.73834
							-3.49199	3.28903		2.41212
							1.52819	3.31132		2.82615
							1.65624	2.92208		2.627
							2.25537	2.96577		2.88691
							2.78984	3.39268		2.78868
							2.47604	3.20952		-2.70434
							1.14311	3.42244		-2.36437
							-1.76497	3.37885		-2.94364
							2.66621	3.38037		-2.04127
							-4.8059	3.58443		-3.0661
							2.4423	3.27125		2.11783
							1.51078	4.09758		-3.29263
							3.09023	3.22958		-3.18306
							-1.58694	3.20518		-2.9382
							-2.36825	3.12638		2.41775
							1.03308	4.75919		-3.53227
							2.47865	3.14125		-2.30627
							1.49263	1.95934		-3.44799
							-4.24748	3.34823		2.12866
							-2.52251	1.89158		2.80345
							2.44304	3.80376		-3.77178
							-4.23605	2.47969		-3.14004
							2.55089	3.45766		-2.57355
							-2.82737	4.70348		-3.63468
							4.07148	2.785		-2.16847
							-2.85388	3.21474		3.08453
							2.68663	3.45571		-3.99254
							-2.33476	2.59965		2.29308
							1.17288	2.39421		2.67611
							1.54491	3.19356		-4.17158
							-2.78054	2.06794		-3.88252
							-4.74577	2.24455		3.24989
							-3.82093	3.00167		-3.33106
							-4.52822	3.24986		2.1401
							2.31197	2.81747		-2.28486
							1.20178	2.0928		-3.61324
							2.59346	1.9833		-4.00703
							-2.05672	3.07068		-2.88122
							-4.90435	2.63492		2.47595
							-4.67537	3.37374		-4.29587
							-1.68872	1.9428		2.88766
							-2.18082	3.50333		-2.44874
							3.62303	2.84553		2.21265
							1.5046	3.3184		-3.82483
							-3.78728	4.69029		3.16496
							2.23344	2.9592		-4.41568
							2.5662	2.42193		-3.65098
							2.28325	2.66279		-3.36825
							-1.64402	3.01415		-4.01749
							1.92602	2.25825		2.38116
							2.29828	3.40418		-2.68047
							-4.90247	4.11779		2.03754
							2.70905	2.14794		-4.09547
							-3.27533	2.08179		-3.78699
							1.00985	3.1647		-2.90715
							2.27794	2.49244		-4.55554
							1.48811	2.26042		-2.33355
							2.74814	3.65922		2.58568
							-1.80226	3.23387		2.834
							-2.48059	3.49189		3.18634
							1.41262	2.0523		2.05844
							2.32527	3.23267		-3.45111
							-1.95485	2.89701		-4.18008
							-2.32681	4.72348		-3.72175
							-3.34199	2.81986		4.71198
							2.6313	3.4615		-2.29102
							-2.49039	3.38114		1.93392
							-4.41205	2.33785		-2.98796
							-1.73406	2.6093		-3.86529
							2.95596	2.22769		2.36859
							-2.1933	3.09463		1.83976
							2.58505	3.9493		2.14557
							-4.35895	2.23895		-3.33261
							1.38201	2.10959		-2.54268
							4.02289	3.51936		3.21927
							2.43315	3.40289		4.21696
							-3.97044	3.17576		4.88432
							2.08245	3.14803		2.59446
							2.34763	2.50305		-2.84338
							2.41762	2.30802		3.83697
							-2.75414	3.46822		3.27186
							2.0387	3.46631		1.9392
							0.819768	2.30891		4.35807
							-3.7662	4.68007		1.68568
							-5.07526	2.38896		1.77723
							-3.14538	3.75109		3.39214
							1.42773	2.59994		-2.76576
							-4.74046	3.55291		5.03491
							-4.9443	3.36576		3.32669
							1.13093	2.88648		1.6591
							0.811907	3.34292		1.9241
							1.94819	2.35528		2.83301
							1.29862	2.70248		4.60686
							3.454	3.21296		2.80122
							2.10593	2.42984		2.03014
							-2.84425	3.49368		2.28764
							2.09547	2.31265		2.5151
							1.11024	3.34675		3.82369
							2.05622	4.19438		2.10031
							-2.49942	3.01041		2.28229
							2.64956	3.52502		1.54823
							-1.85598	2.34974		5.16664
							-2.34788	3.43492		1.47341
							1.02563	3.20156		3.52243
							-1.97166	3.26705		4.09949
							-3.49029	4.57262		4.5683
							1.48401	3.50844		2.68836
							1.42703	2.83015		2.94115
							-2.23121	3.58475		1.48096
							2.55384	2.37584		3.02731
							-4.79902	2.63045		2.32739
							-4.26421	2.561		3.6444
							-2.7782	3.57454		1.8121
							2.44468	2.47147		2.12268
							1.45154	2.45854		5.28987
							-5.18459	3.51627		1.69298
							-5.15915	3.65569		2.16282
							2.37325	2.86209		3.66156
							2.63379	3.08209		1.59711
							2.21153	3.59301		2.50172
							1.88437	4.03717		3.26339
							2.03186	2.42173		1.48879
							-4.46255	3.11409		4.22417
							4.05237	3.44144		1.11459
							-2.25329	2.75933		5.3855
							-2.85287	3.66797		3.00282
							2.87963	3.66051		3.64789
							-2.29626	3.63469		3.84844
							-4.95281	3.65197		1.24412
							2.51113	4.48106		1.40114
							-1.29676	3.42263		1.51777
							1.8694	2.57161		1.92562
							1.43517	2.39634		2.33342
							-3.58769	2.73389		2.84149
							1.43668	3.68801		1.85559
							-2.60871	2.58548		1.11544
							1.25386	2.99925		3.60731
							-4.70264	3.26867		2.10341
							-3.91572	2.99025		4.91611
							0.859921	2.78134		5.46301
							2.09021	2.46878		1.35332
							2.09714	3.44486		3.32123
							0.928276	3.70476		1.67928
							-2.7911	3.93818		2.54535
							1.83168	2.64929		3.37979
							0.609834	3.69735		3.94003
							1.07327	4.40339		2.08616
							1.9999	3.26108		1.16089
							-2.4427	3.04887		1.29669
							2.53186	3.1748		2.9384
							3.36517	2.51872		1.72826
							1.42981	3.36361		1.49551
							-5.247	3.59609		5.16048
							-2.15724	2.84061		2.25018
							0.67746	2.66778		3.77677
							1.72079	2.53575		1.75864
							-2.92992	3.72704		5.55724
							1.5053	2.59336		3.56966
							2.31851	2.80548		4.49822
							1.48967	3.6534		2.4938
							2.64318	3.49634		2.09578
							1.86932	3.18011		2.20482
							-1.41768	3.43348		3.11443
							2.20983	3.86499		1.66841
							-5.10239	2.33466		1.506
							-5.39967	4.26399		2.08814
							-2.72574	3.69206		4.85932
							-3.2892	2.77129		4.17067
							-3.08677	3.61444		2.06916
							4.0854	2.69391		1.76982
							1.6456	3.28367		5.65796
							-4.23397	3.57779		2.68138
							-5.50966	3.11087		5.26226
							-0.948706	2.61649		3.42697
							2.06204	2.37534		2.8268
							-2.9878	3.26323		1.91491
							1.49125	2.94666		3.39221
							3.58949	2.72014		2.44817
							-2.80474	3.81117		3.52949
							-4.97986	2.35047		2.67052
							-4.62438	3.65749		2.16111
							2.45585	3.46075		2.36698
							2.4478	2.89345		3.86574
							0.951717	2.77688		3.69936
							0.705048	4.07882		2.05436
							2.95949	3.50292		5.03965
							1.48193	2.69388		3.20545
							-3.6801	3.05028		4.60591
							1.52523	3.14963		5.71133
							-2.99669	2.56148		2.08589
							2.34782	3.06802		3.44777
							1.22346	3.57358		2.50759
							2.14194	2.39778		2.52426
							-4.65473	3.31971		2.31949
							1.71398	2.54581		5.38812
							-3.09532	3.55547		3.05849
							1.82812	3.70925		2.82812
							-2.04914	3.16666		2.53286
							1.53331	2.89655		2.75486
							2.43571	2.72229		2.43667
							1.56786	3.33137		3.14354
							-5.61762	3.61362		5.7935
							2.3605	3.93813		3.03252
							1.53618	2.90984		3.65742
							-5.46753	3.42025		3.3678
							-1.51229	2.66969		2.48901
							1.9153	3.08865		4.29847
							1.56564	3.37106		3.81352
							0.812747	3.044		4.70869
							-5.33978	3.19664		5.09984
							-3.98115	3.52723		3.85935
							1.49323	2.54255		5.85556
							-5.70697	2.37946		5.54246
							1.4497	3.58614		2.81674
							-3.01804	3.00018		3.68808
							-3.20778	3.78376		3.15358
							-3.48251	3.24921		3.19274
							2.46739	2.60965		2.81453
							-1.06736	3.18203		2.8309
							2.22003	2.87159		3.08055
							2.40508	3.40094		3.43386
							-3.37707	3.01328		3.15938
							-3.4695	2.87571		3.48323
							2.06353	3.40173		4.614
							2.00874	2.52803		4.35068
							0.804808	2.81191		4.93692
							4.15509	3.23315		5.88566
							1.59505	3.55625		3.20673
							1.72289	3.20582		3.67312
							1.32236	3.44736		3.92721
							1.14002	2.54728		5.67091
							-3.74138	3.35543		3.16282
							-3.4267	2.97544		4.119
							-5.39452	3.64315		3.53818
							-5.66319	3.03965		3.298
							-4.63555	3.22624		3.91922
							1.56872	3.18505		4.06288
							3.47536	2.99844		3.67261
							-5.79234	2.8825		5.88996
							-2.56129	3.32046		5.19494
							1.53409	2.64431		5.79917
							1.50735	2.62685		3.91514
							1.81624	3.52314		5.37655
							-5.07835	3.40162		5.0308
							2.73338	3.38911		3.88345
							1.50577	3.30514		4.52572
							-5.93017	3.50753		3.97566
							-1.92075	3.39983		4.77749
							2.32321	3.26169		3.53471
							1.55251	3.26256		3.6446
							1.71871	2.80313		3.78073
							1.90545	3.07554		5.83669
							0.923405	3.32743		4.27623
							3.01064	3.28337		5.5478
							1.46033	2.5894		4.11838
							2.09713	2.97655		3.71309
							2.30422	3.42227		3.75545
							-4.4315	2.66352		3.99141
							-3.69483	2.80115		5.27303
							-1.39282	3.39984		3.99203
							2.21307	3.41024		4.28836
							-0.970303	3.43042		4.15338
							-3.17385	3.47621		5.7457
							-5.37686	3.38544		3.86004
							-4.01431	3.16126		3.92237
							-4.48392	3.44364		4.98189
							1.61034	2.83238		5.74846
							1.38634	3.40501		4.17515
							1.73849	2.67431		5.64551
							1.19324	3.41802		3.96976
							-4.8446	3.31255		5.4499
							2.01101	3.048		4.58459
							0.881042	3.46815		4.76819
							-3.94908	3.48304		5.36683
							-3.87699	3.60804		5.18627
							-6.09514	3.40766		4.00633
							2.04645	3.49563		4.40202
							4.22259	2.79804		4.38561
							1.501	3.40437		4.20395
							-2.19292	3.60544		4.41811
							1.38604	3.09977		5.68663
							-5.88358	2.75549		4.62763
							-6.06415	3.49772		5.34646
							1.60043	3.32646		4.28357
							1.53753	3.30583		4.35732
							1.56666	2.96287		5.65266
							2.55652	3.25549		4.40622
							-5.6237	3.65101		4.51055
							2.1973	3.34659		5.67983
							1.44727	3.40127		4.40672
							2.07649	3.01996		5.18822
							1.83063	3.64683		5.51154
							-1.07612	3.57921		4.5927
							1.55248	2.81964		5.44369
							1.7588	3.41433		4.3858
							1.82242	3.70898		4.46866
							-2.76006	3.60344		5.03681
							-1.98545	3.30336		5.31821
							1.6884	3.3975		5.60258
							3.68446	3.42349		5.60081
							-4.13668	3.67348		5.23014
							2.11874	3.37074		5.41626
							1.07573	3.69801		5.59116
							-2.20319	3.09432		4.71401
							2.31377	3.42311		4.60282
							-1.32783	3.65802		4.64964
							1.57064	3.11471		4.6441
							-5.47966	3.4126		4.73448
							-4.61056	3.68751		5.42144
							-5.12876	3.47766		4.80672
							-4.3979	3.52554		4.77136
							-5.2297	3.38051		4.732
							-6.30605	3.43734		5.56094
							2.88234	3.11646		4.69254
							3.20061	3.72903		5.58013
							1.01192	3.79924		5.56513
							-4.37916	3.71971		4.75142
							-5.69359	3.52403		5.29291
							1.63919	3.2703		5.02674
							1.97592	3.46561		5.56372
							-6.30931	3.45638		4.88887
							-5.00164	3.33825		4.98707
							1.34577	3.89218		4.77492
							1.75657	3.53317		5.57932
							-4.44519	3.81346		5.59432
							1.8958	3.55164		5.55202
							4.27843	3.67392		5.53344
							2.04002	3.28878		4.92631
							1.61602	3.63384		5.55369
							2.07578	3.88935		4.97528
							1.68434	3.70125		5.00883
							1.88298	3.82201		5.60554
							1.96808	3.40794		5.58082
							1.50955	3.57696		5.39688
							1.5529	3.55245		4.96038
							-6.09515	4.00767		5.56803
							-1.6255	3.44703		5.21355
							1.57676	4.04735		5.57482
							-6.37173	3.7169		5.18855
							-4.61083	3.47599		5.1344
							2.10144	3.62609		5.04962
							2.41966	4.05059		5.13247
							-5.76074	3.89333		5.70774
							-4.81454	3.49663		5.15793
							-2.33313	3.8891		5.53902
							1.67015	4.2662		5.66415
							1.84134	3.72469		5.51594
							1.88284	3.76368		5.61956
							-4.93277	4.1435		5.63013
							2.88094	3.64004		5.14147
							2.00756	3.72546		5.2493
							-3.96473	3.72165		5.63371
							-1.15681	3.85047		5.56518
							1.88183	4.31235		5.33239
							1.86264	3.81506		5.50332
							-1.87931	3.94561		5.54171
							3.16377	4.09662		5.59537
							-6.47918	3.72725		5.55081
							3.56653	3.8332		5.61409
							-3.2605	3.93792		5.39035
							2.52212	4.45954		5.33474
							-4.81733	3.98979		5.61369
							1.62122	3.89692		5.74186
							-5.90134	3.86701		5.4252
							-5.18515	3.87283		5.60637
							-5.3999	4.36678		5.64563
							-2.02239	4.56995		5.68338
							1.82852	4.54687		5.6227
							1.49002	3.96332		5.49746
							1.72754	4.17837		5.40431
							-5.6128	3.93685		5.62148
							-6.64016	4.06632		5.51332
							1.72399	4.08083		5.67392
							4.33133	4.65444		5.54456
							-4.9047	4.18401		5.51689
							1.79248	4.13845		5.74351
							-4.97062	4.0873		5.61238
							-6.47088	4.18957		5.5405
							1.95023	4.85309		5.70486
							-6.33599	4.12538		5.47233
							-6.7039	4.83252		5.68912
							1.61982	4.33853		5.6178
							1.82495	4.13517		5.76686
							1.59202	4.9501		5.77972
							1.35606	4.26405		5.7253
							3.80423	4.24766		5.55637
							-1.6663	4.22686		5.6057
							1.99952	5.01055		5.76396
							1.65222	4.24751		5.81147
							1.92199	4.88602		5.7362
							-6.35415	4.6036		5.64734
							-1.33402	4.29973		5.77714
							-4.80414	4.44979		5.72444
							2.04081	4.33802		5.92796
							3.0551	4.42567		5.59413
							1.75564	4.50385		5.86789
							2.13759	5.04017		5.83886
							2.11542	5.0593		5.78248
							-6.02412	4.49853		5.94411
							1.66941	4.3833		5.63308
							1.98196	4.45375		5.6922
							-2.46317	4.97452		5.9121
							2.36164	4.42102		5.89834
							-5.77327	4.71296		5.84734
							-5.12964	4.58523		5.7133
							2.8106	4.88577		5.73731
							1.9966	4.51403		5.74816
							1.30479	5.23302		5.90135
							2.32776	5.27412		5.73712
							1.95785	4.5994		5.91373
							1.93661	4.65428		5.93236
							-6.75103	4.71792		6.0282
							-6.68248	4.90182		5.88402
							-1.9489	5.14498		5.93846
							1.67973	4.60866		6.18731
							-6.15065	4.73576		5.84305
							-1.98909	5.23484		5.93542
							3.36301	5.48596		6.17092
							-5.39436	4.73342		5.82936
							-3.53002	4.71572		6.04096
							-6.87747	4.77395		6.09371
							1.71462	5.15243		6.03132
							-5.727	4.85967		5.8564
							2.01426	5.568		6.04034
							-6.46273	5.28649		6.11379
							1.70353	4.8972		6.08127
							2.55329	5.03838		6.00944
							1.63146	5.00056		6.28564
							1.91332	5.47586		6.15983
							4.4573	4.97489		5.95667
							-5.24626	4.9632		6.51077
							1.68676	5.40937		6.13879
							1.7117	5.59635		6.13274
							1.83015	5.6622		6.2333
							-5.38545	5.21035		6.37819
							2.20177	5.05743		6.21412
							-2.82896	5.61986		6.56647
							2.15222	5.09645		6.18746
							1.86511	5.18801		6.22974
							3.79068	5.17399		6.11333
							-5.39153	5.12518		6.14047
							1.93369	5.42139		6.23557
							1.65501	5.52042		6.25277
							-6.13808	5.64338		6.39805
							1.7517	5.71624		6.81674
							-4.15103	5.76528		6.32659
							-1.58147	5.34086		6.67709
							2.15358	5.37325		6.23128
							1.78693	5.79801		6.35687
							2.7613	5.44993		6.61183
							-5.46845	5.74317		6.28959
							1.77402	5.60142		6.3683
							-1.87507	5.48078		6.44976
							-5.78014	5.5412		6.48074
							-4.73459	5.68664		6.6724
							-6.96448	5.72598		6.34046
							1.63308	5.92332		6.47793
							1.82236	5.93488		7.15372
							2.04656	5.97824		6.48209
							-6.98188	5.80005		7.01688
							-2.01377	5.81277		6.60069
							1.43951	5.76561		6.48214
							3.07021	5.89149		6.57043
							-6.66414	6.10135		6.81582
							-6.77336	6.00948		6.53258
							-2.12466	5.9161		6.52809
							3.49192	5.93859		7.38761
							2.36184	6.14246		6.80165
							-6.49309	6.16432		6.58364
							2.21467	6.10252		6.59437
							2.35132	6.27919		6.82461
							1.82444	6.23927		7.15541
							-3.62663	6.16871		6.69775
							-1.40912	6.28722		6.99124
							2.11868	6.47836		6.76686
							1.77801	6.43737		7.3781
							1.78605	6.3979		6.80321
							-6.08656	6.63875		6.8954
							2.33184	6.57266		6.81208
							-5.83631	6.83186		7.03985
							4.51253			7.2326
							2.73028			6.92341
							2.02959			7.49135
							-5.67215			7.05051
							-6.46976			7.31983
							-6.15016			6.96775
							2.16894			7.16327
							1.78082			7.18946
							1.74474			7.65163
							1.76337			7.31516
							3.776			7.68841
							-5.24064			7.34123
							-2.76201			7.72319
							1.6923			7.39844
							4.12688			7.55317
							1.62177
							-6.94334
							-5.73675
							2.11375
							-3.97867
							-7.04959
							-6.9651
							1.92059
							-1.66024
							3.33032
							1.79487
							3.30218
							2.46168
							2.05793
							2.16579
							-5.64691
							-6.05533
							-1.81803
							2.09933
							2.43831
							2.50864
							1.87256
							1.91026
							2.34625
							-6.58449
							2.18861
							-4.55755
							1.78664
							-5.90504
							-2.0977
							1.74124
							-3.21342
							1.58409
							2.46416
							2.32686
							1.73023
							2.02258
							1.81279
							3.16569
							2.52544
							1.73314
							-6.53969
							4.55945
							2.11727
							1.90524
							-5.17077
							3.89371
							3.52088
							-2.61949
							-6.78367
							-5.9191
							1.75406
							2.28056
							1.63307
							-5.97819
							-7.02122
							2.036
							2.07221
							1.58065
							2.02955
							-5.98903
							2.38773
							-7.05763
							-1.52327
							-3.75693
							2.18086
							2.03708
							1.70076
							-1.64279
							-6.21606
							2.51314
							2.60041
							2.4268
							-6.77497
							2.82714
							-5.43414
							-6.35276
							2.45358
							1.79721
							2.89292
							-7.0018
							-5.99997
							3.27532
							2.37647
							3.06833
							1.77668
							-2.95001
							4.68702
							1.61608
							2.19237
							2.62669
							2.11734
							3.65042
							-6.88388
							-4.33722
							2.36022
							-1.8535
							1.77795
							1.75892
							1.78536
							1.85947
							2.67405
							2.6844
							-6.66013
							1.79621
							-6.10107
							2.13516
							1.71682
							2.39264
							-5.80636
							-6.91385
							-6.39056
							2.06137
							2.27947
							-4.93657
							2.0545
							-6.02538
							2.87629
							1.4965
							-1.774
							3.86471
							-6.99031
							-6.91833
							1.5746
							-6.05175
							-2.20095
							1.80827
							2.8819
							2.22927
							3.12291
							1.75619
							2.56174
							-3.38754
							-6.47676
							1.66148
							-6.68496
							-6.50487
							1.94478
							3.46424
							5.91067
							2.1298
							4.76522
							2.5766
							2.70196
							-6.22956
							-1.79193
							2.69733
							-1.68727
							1.59098
							2.28231
							2.31059
							-6.68451
							1.86314
							2.78844
							2.35428
							-2.5614
							-6.85935
							-6.08814
							2.45507
							2.09459
							-6.04149
							-1.77845
							2.76745
							1.56739
							2.11187
							2.59175
							1.36373
							3.8584
							-6.79285
							2.16857
							4.10252
							2.11563
							-6.09715
							1.67904
							1.95727
							4.67471
							-6.35046
							1.56414
							1.6061
							1.75996
							3.18474
							2.24027
							-6.84552
							3.74704
							1.91844
							2.55518
							5.10567
							-1.9391
							2.92419
							1.88222
							-6.57662
							5.68665
							2.72801
							4.77532
							2.33191
							2.84029
							2.13509
							2.86633
							2.54007
							1.99219
							1.79038
							3.48637
							2.67835
							2.47011
							-6.06127
							-6.21954
							-6.03722
							2.65073
							-6.02682
							-6.56777
							2.29642
							-6.08379
							2.7779
							1.46323
							1.73051
							1.5011
							1.60632
							-1.73901
							4.37832
							2.19849
							2.01654
							1.8745
							1.79798
							2.20258
							2.25902
							1.80437
							-6.14782
							2.58956
							1.43777
							2.11775
							4.00593
							-6.69924
							1.68426
							2.73834
							1.39921
							3.24874
							-6.21552
							3.08856
							3.0552
							5.10275
							2.0226
							3.72011
							-6.55687
							4.45375
							2.21228
							1.96378
							2.31635
							4.80038
							2.41212
							2.57889
							2.82615
							2.53721
							-5.98798
							2.87565
							3.65612
							2.10635
							-6.24934
							1.97444
							2.27484
							2.49675
							-5.93679
							2.627
							2.88691
							1.70408
							-5.56077
							4.26703
							2.38023
							2.78868
							1.43126
							1.53736
							1.70461
							2.30205
							1.64885
							1.5424
							-5.94915
							1.88438
							2.52794
							-6.3275
							-6.51906
							1.98324
							2.55849
							2.2047
							-6.31941
							1.84648
							1.68679
							1.95524
							-6.49091
							1.87061
							-5.99107
							2.37211
							2.17909
							2.07064
							2.14032
							3.42343
							2.34787
							-4.42697
							2.81653
							2.2476
							3.85569
							-5.83994
							2.62232
							2.80315
							2.19581
							2.1973
							-6.28416
							4.80826
							1.95664
							1.60668
							1.50797
							-5.82073
							1.8115
							4.10868
							2.60679
							2.03848
							-5.84165
							3.67296
							-5.314
							3.27225
							1.99155
							-4.75776
							2.54014
							-5.80183
							2.50617
							1.71742
							2.2632
							2.60868
							2.16867
							-6.00317
							3.07993
							2.83019
							2.26831
							2.48492
							2.43521
							-6.3953
							-3.51805
							2.09113
							2.70669
							2.64445
							1.76758
							2.14692
							-6.30709
							2.46835
							1.97326
							1.4774
							1.92979
							2.62611
							2.19834
							-6.13425
							2.28468
							1.70463
							2.30383
							2.87171
							2.54903
							2.65111
							2.64073
							2.33506
							2.27561
							2.12868
							1.55959
							1.92341
							1.69622
							-4.12066
							2.78298
							1.98532
							3.20726
							2.03506
							-5.34562
							3.4941
							-5.79207
							1.9262
							4.84206
							2.54566
							-5.66766
							2.12087
							-5.66874
							3.78857
							-5.66451
							2.40884
							-5.94227
							-6.29362
							2.78393
							2.60576
							2.50714
							-3.14975
							2.17187
							2.66859
							-5.62048
							3.00534
							3.15915
							2.26553
							4.12818
							2.36929
							2.25287
							2.04991
							2.45877
							2.44349
							2.56307
							3.24643
							1.94326
							2.55612
							2.01475
							2.94409
							1.66915
							-4.45025
							1.54381
							1.98785
							2.69949
							2.15628
							1.60805
							2.91082
							3.25993
							2.32983
							2.39518
							2.22331
							-3.88451
							2.49394
							1.75332
							3.16837
							-5.63469
							1.83127
							2.27433
							1.66247
							2.52577
							-5.09811
							3.69411
							-5.68525
							3.57092
							3.59674
							-5.60283
							4.91084
							2.11051
							2.47626
							2.46568
							2.13038
							2.5021
							2.50707
							2.44279
							2.5603
							3.07503
							-6.22862
							2.6172
							2.69383
							-2.87311
							3.87151
							2.95843
							2.48234
							2.19462
							-5.77497
							-5.41567
							2.02505
							2.1433
							2.3833
							-6.18105
							-5.90042
							3.32373
							-4.60292
							2.3728
							2.3334
							2.08921
							1.56777
							2.45019
							2.42259
							3.71058
							4.32288
							3.80464
							2.53155
							1.78907
							2.91168
							-4.06793
							-5.67995
							2.3329
							2.21335
							2.06214
							3.29089
							2.40063
							2.69634
							3.6868
							2.29007
							1.85303
							-5.80805
							2.54757
							2.09322
							2.63671
							2.01535
							2.74967
							2.60881
							2.34836
							2.84369
							1.91587
							2.28271
							2.69896
							2.4471
							2.23681
							-6.12429
							-5.73901
							3.02512
							1.80895
							3.81327
							2.56291
							4.88517
							-5.60651
							2.40534
							3.43422
							-5.08985
							2.41783
							2.79457
							-6.13153
							3.33176
							3.08011
							-2.63638
							-4.47387
							-5.98943
							2.25551
							2.7598
							2.13619
							3.79506
							2.57364
							-4.69257
							1.9013
							1.63965
							3.54814
							2.17238
							2.34252
							2.75276
							3.01266
							2.04819
							4.15119
							-5.43466
							3.51052
							4.37118
							2.54509
							-5.92
							-5.74828
							2.46279
							2.25172
							2.74641
							-3.89251
							1.89895
							-6.23021
							1.97308
							3.81016
							2.51261
							2.56946
							1.9531
							2.07242
							2.31871
							2.80536
							1.97724
							2.64406
							2.31078
							-5.90392
							2.71535
							-5.81631
							2.87236
							2.80309
							3.93603
							2.93433
							2.08984
							2.56304
							2.74682
							2.27508
							-5.94863
							4.79573
							1.98848
							2.99846
							2.28997
							2.13619
							5.74263
							3.61028
							-4.35479
							2.33224
							4.05773
							-5.10767
							-6.24662
							2.92775
							-2.88814
							3.43075
							3.15672
							2.20508
							-5.89799
							1.76693
							3.72268
							1.74384
							2.48589
							2.43935
							-5.39257
							3.53266
							-4.67238
							1.98316
							4.02868
							3.26191
							3.07808
							2.17222
							2.52302
							2.72534
							1.48439
							2.92141
							-5.58587
							2.94295
							2.73769
							-6.28027
							2.058
							2.28017
							4.05864
							2.69008
							1.71127
							-3.45596
							2.223
							2.54502
							2.89769
							-6.11159
							-3.83735
							3.62125
							2.51986
							1.76396
							2.3648
							-6.10666
							2.30311
							3.02673
							3.20373
							2.89937
							2.19138
							3.8012
							2.5209
							2.61627
							3.37712
							4.74584
							-4.05183
							3.09639
							2.61781
							4.05955
							-6.03173
							5.19178
							-2.69641
							4.91617
							3.84653
							-6.14973
							2.91557
							1.83344
							5.99133
							-6.16938
							2.36947
							1.69348
							2.44206
							2.44567
							2.76315
							3.58088
							3.06405
							-5.63035
							1.6994
							2.15467
							2.466
							2.9484
							3.70133
							2.34008
							2.18979
							3.28678
							5.32372
							4.61153
							2.15796
							2.62857
							1.71901
							-3.41612
							-6.22403
							4.15717
							-1.4965
							3.33996
							-3.6926
							3.16035
							1.97406
							2.79077
							2.90978
							-6.17742
							2.48171
							4.08114
							2.55741
							2.82127
							4.15313
							3.86575
							2.2868
							-6.29583
							4.75068
							2.92209
							3.12244
							3.40189
							-2.57953
							5.10184
							-2.54735
							2.98382
							3.19491
							2.30894
							1.11156
							-2.90579
							1.95031
							3.76935
							2.53189
							-6.06191
							3.16167
							4.06948
							4.19604
							2.84323
							6.33833
							2.48355
							-1.32771
							2.43384
							5.37586
							1.27192
							2.77814
							-5.83176
							-2.97309
							2.93488
							1.88995
							6.20184
							3.12737
							2.15531
							2.70805
							-6.26627
							3.14939
							-5.48892
							-2.86427
							2.999
							2.11438
							2.74271
							4.51196
							-6.35141
							2.01263
							3.20547
							-6.15024
							4.90204
							-2.26866
							-3.84661
							2.26554
							2.14475
							3.55905
							2.4954
							3.29748
							3.21882
							2.72671
							5.22589
							3.20842
							2.09182
							3.26477
							2.87386
							4.79459
							2.39655
							3.60676
							-2.45355
							-3.77711
							-6.51905
							3.36372
							2.61668
							3.84637
							1.86914
							4.08116
							-2.77634
							3.6891
							2.81627
							3.25718
							1.92657
							-5.9915
							-2.70589
							3.74135
							-6.43734
							3.05328
							4.02201
							3.63269
							3.64303
							3.54533
							3.33363
							3.83842
							4.151
							2.83221
							-2.74789
							4.10384
							4.12722
							4.10126
							4.03994
							2.29925
							3.99049
							2.20656
							1.89228
							2.0187
							1.91048
							2.13601
							2.16928
							4.05446
							2.01798
							2.35395
							2.41696
							2.16139
							2.56608
							2.61637
							2.73362
							2.39952
							1.96484
							2.8118
							4.05405
							2.43847
							2.9598
							2.50189
							-4.70361
							-3.63708
							-4.80345
							3.14514
							1.87689
							3.25534
							3.50027
							2.65416
							2.70793
							-2.99164
							-2.84993
							3.28903
							-7.28226
							3.31132
							3.05277
							1.89039
							-2.75165
							2.92208
							2.74727
							2.96577
							2.84193
							2.8314
							3.39268
							2.78923
							3.20952
							3.42244
							2.05179
							-8.38434
							3.37885
							3.38037
							3.58443
							2.18353
							-10.1607
							3.27125
							2.39375
							4.09758
							2.45502
							3.22958
							3.20518
							3.12638
							2.75442
							2.76414
							2.91181
							2.86091
							2.79808
							4.75919
							-12.7866
							-7.91015
							-7.37081
							3.9244
							3.76865
							4.35633
							4.51116
							3.27142
							-5.6321
							-3.13741
							4.79606
							2.80774
							-2.99061
							4.92322
							5.06111
							5.2878
							-5.43022
							-5.61416
							-5.66446
							-5.87802
							-6.08384
							-6.22547
							-6.31988
							-6.46185
							-6.63835
							6.64293
							6.68963
							6.73113
							6.63015
							6.51795
							6.42064
							4.21727
							3.14125
							6.72348
							4.23805
							-2.93623
							-5.94432
							1.95934
							3.34823
							-2.85663
							-3.63881
							-3.71369
							4.21645
							1.89158
							3.80376
							2.47969
							3.45766
							6.83913
							-2.80604
							-7.46287
							3.86256
							2.27508
							4.70348
							2.785
							2.94474
							1.7612
							-3.12167
							5.07259
							2.76698
							3.21474
							3.45571
							2.59965
							3.81048
							1.92545
							2.39421
							-2.79359
							-9.53369
							4.89142
							-6.20888
							3.19356
							2.06794
							6.70964
							4.598
							-2.57791
							2.24455
							3.00167
							-8.26486
							-5.42879
							3.24986
							-6.64967
							2.81747
							2.0928
							-2.97907
							6.60629
							1.9833
							3.07068
							3.20891
							-5.6346
							2.9129
							-10.1801
							5.29124
							-1.92659
							-2.61129
							2.28799
							6.88047
							2.63492
							-4.14074
							4.29685
							3.37374
							-5.88456
							2.62109
							-3.73333
							1.9428
							-2.89224
							-3.69271
							2.14401
							3.50333
							2.84553
							-8.87964
							5.024
							-8.10393
							4.35309
							3.3184
							-8.68779
							4.69029
							6.97886
							1.61244
							4.48779
							2.75145
							2.9592
							2.42193
							3.96419
							2.66279
							-6.59431
							-2.49247
							3.01415
							2.25825
							3.40418
							3.94514
							-3.11608
							-2.21076
							4.11779
							-6.20351
							3.54652
							2.14794
							2.80539
							2.08179
							4.7086
							5.19788
							3.1647
							2.49244
							2.26042
							3.65922
							3.23387
							-1.63995
							-8.69778
							-7.08061
							-5.44128
							3.49189
							-4.74156
							-2.11096
							1.70089
							2.27471
							-2.2845
							2.11734
							-5.77142
							6.64074
							2.0523
							3.23267
							7.05403
							-3.76809
							4.89737
							-2.94067
							5.0688
							-5.54487
							-4.27209
							2.89701
							4.29985
							4.19998
							4.72348
							-2.87977
							-7.83532
							1.53396
[truncated: 1,603 more rows]

## Sheet: Blad4
	mean	std	95low	95up	surface		face	forehead	nose	cheeks	upper lip	chin
face	-6.1897	5.293	-14.4614	3.70976	13303		-7.56788	-7.10265	-3.26367	-8.92455	4.06748	-8.04361
forehead	-4.33074	2.6913	-8.68309	2.16374	3428		-7.07935	-7.48567	-3.67158	-8.74575	4.30248	-7.6942
nose	-3.66794	1.97767	-6.82934	-1.66005	599		-6.65207	-6.60869	3.73483	-9.13693	3.80779	-7.50375
cheeks	-8.34756	5.21119	-15.7957	-3.13082	2972		-8.36515	-7.1084	-3.085	-8.57746	-4.55226	-8.30391
upper lip	-4.17163	3.83418	-8.53488	4.01194	498		-7.09979	-7.98751	3.7242	-9.33559	3.54012	-8.49715
chin	-1.93845	10.4452	-11.7628	11.8247	542		-6.28012	-6.24746	-2.77691	-9.14157	-4.94034	-8.65866
							-7.47541	-8.47145	3.16652	-9.58877	-3.54368	-8.21547
							-8.05164	-6.93162	-3.60259	-9.0507	3.84534	-8.81366
							-8.80243	-9.05195	-3.04743	-8.89991	4.26746	-7.63426
							-6.02594	-6.06158	3.01069	-8.43363	-4.38301	-8.73105
							-6.93731	-7.8189	-2.28783	-9.50901	4.32295	-8.97176
							-8.39725	-9.66428	-3.32192	-9.36825	-5.36955	-8.95873
							-7.40798	-6.32003	-3.03375	-9.79501	-3.86643	-8.58189
							-7.77898	-8.34938	-3.61841	-9.29545	-4.97333	-9.10574
							-8.69178	-7.12376	2.28575	-9.7623	4.10445	-7.97264
							-9.15363	-10.2394	-2.99809	-9.50564	3.60367	-9.02137
							-9.00913	-5.99114	-3.18494	-9.1856	-3.86322	-9.21885
							-8.33214	-9.55472	-2.83918	-8.75924	-3.70014	-9.26087
							-5.91679	-7.76881	-2.66903	-9.49179	4.18265	-9.39919
							-6.22066	-10.6531	-2.9038	-10.1227	3.80313	-8.26743
							-8.08902	-8.59291	-2.18479	-8.5713	-4.45151	-8.84416
							-8.63014	-6.43876	-2.48531	-9.71345	-3.26367	-9.29172
							-9.2558	-6.04077	-2.26898	-8.23319	-3.84864	-9.57857
							-9.03881	-5.93345	-2.70892	-10.1165	3.58178	-9.47264
							-9.60907	-6.85933	-2.55085	-9.65823	3.72562	-9.64828
							-7.40702	-8.83742	-4.08005	-9.50058	3.80467	-9.86722
							-6.79136	-11.0962	-2.4106	-9.07401	-3.97594	-8.67831
							-8.87327	-9.92267	-2.60141	-10.0287	-3.085	-9.78
							-7.84271	-7.25505	-3.16029	-10.5367	-3.55994	-9.92511
							-8.46345	-6.48196	-2.50188	-9.353	3.44257	10.0578
							-9.23906	-7.86457	-2.48513	-8.80699	-3.04743	-9.81086
							-5.83382	-6.13893	-2.69399	-10.3204	3.36998	-10.3111
							-8.92455	-8.95245	-2.72914	-9.88068	-3.43402	10.265
							-9.53772	-11.4086	-2.45687	-9.75187	-3.53446	-10.1477
							-8.74575	-5.8396	-2.33131	-10.0395	3.21725	-9.04965
							-6.08384	-5.98624	-2.33299	-10.5878	-3.2499	10.005
							-9.13693	-6.15266	-3.64231	-8.56043	-3.61841	10.5542
							-10.0222	-6.45124	-2.21422	-10.9675	2.91601	10.6611
							-6.48018	-7.03397	-3.65176	-10.45	-3.12262	10.6308
							-8.14867	-9.29258	-2.28441	-9.61544	-3.19923	-10.2819
							-7.43027	-8.43788	-2.84884	-10.6928	-2.46795	-9.92045
							-9.47004	-11.501	-2.90406	-10.2258	-4.08005	-10.6418
							-8.57746	-10.8357	-3.64539	-8.01153	-2.89038	-9.37894
							-9.33559	-6.00406	-3.4966	-8.99791	-2.40192	10.6065
							-7.84791	-10.1232	-2.11708	-9.85655	-3.53862	10.3332
							-9.8733	-7.65571	-1.76874	-11.0011	-3.69225	11.1747
							-6.25569	-5.78627	-2.23437	-10.1482	-3.16354	11.0962
							-9.14157	-5.90242	-2.66941	-9.27791	-2.21993	-10.8101
							-6.97769	-6.51598	-2.4539	-11.2143	-3.65176	10.8298
							-9.73498	-9.47987	-1.42148	-10.6639	-2.43986	-10.4259
							-5.83321	-8.64206	-3.58582	-11.3376	-3.80342	-9.55514
							-10.128	-6.1265	-1.68847	-10.4912	-5.74505	11.1669
							-9.58877	-11.5018	-3.14277	-10.9177	-2.07967	10.7025
							-9.0507	-7.20282	-2.59573	-8.23766	-3.08641	11.5416
							-10.0338	-7.81114	-2.07967	-9.56333	-2.3605	11.3303
							-10.5086	-6.3575	-4.69341	-8.63892	-5.73073	-10.8852
							-8.89991	-5.67082	-2.41373	-10.4287	-3.89568	11.5561
							-8.43363	-10.7117	-3.57299	-9.93901	-6.74118	-10.2428
							-7.72768	-6.59129	-2.0273	-11.4731	-2.68875	11.2911
							-8.1526	-8.93327	-4.65957	-10.2326	-5.7561	-9.59292
							-9.50901	-9.52168	-1.58448	-11.3737	-3.43838	11.3578
							-9.36825	-10.0295	-4.99825	-10.8292	-2.74438	11.0137
							-10.3706	-5.85473	-1.85066	-11.2762	-11.3687	-10.0682
							-6.18681	-6.10753	-2.95882	-11.07	6.83726	11.6386
							-9.79501	-11.3848	-1.54626	-11.7603	-11.5839	-10.4152
							-9.97785	-8.23291	-1.8194	-9.38379	-6.569	11.7059
							-5.94731	-6.2731	-3.7845	-7.62388	-5.43416	-11.1045
							-6.77209	-6.77963	-2.36633	-11.7769	-3.33028	11.2311
							-9.29545	-10.7561	-1.62115	-11.3516	-3.40901	11.396
							-7.89806	-7.42699	-4.51339	-10.6992	-3.62035	11.4868
							-7.4106	-8.63759	-2.86956	-7.84172	-3.7102	11.6703
							-9.7623	-5.57122	-2.68875	-11.1513	-3.92647	11.6862
							-9.50564	-5.90647	-2.08543	-8.98498	-3.79643	11.6321
							-9.1856	-9.42049	-3.66468	-11.7178	-5.90337	11.5486
							-8.75924	-6.51313	-5.92855	-10.8879	-4.38584	11.3669
							-7.02903	-10.0378	-5.36696	-10.4818	-6.66831	-11.2073
							-5.94907	-6.88043	-5.19894	-8.56278	-3.54284	-10.98
							-10.4361	-11.2177	-1.91737	-12.0296	-6.87872	-10.6832
							-9.49179	-6.26657	-6.05607	-11.7046	-4.36558	-10.4875
							-10.9579	-8.94051	-6.35917	-9.72874	-6.52315	-10.0935
							-10.1227	-7.73658	-5.69688	-12.0913	-7.93746	-9.85745
							-8.5713	-10.4972	-5.6119	-10.0718	-10.7519	-9.46267
							-9.71345	-6.0907	-6.59066	-11.4666	-3.47766	-11.0684
							-10.336	-5.43468	-6.6065	-10.877	-6.04199	11.7454
							-8.23319	-7.03124	-4.76125	-12.1146	-4.53474	-10.3414
							-5.96246	-9.43626	-4.72324	-12.0265	-9.69193	11.7785
							-7.69741	-8.24227	-6.3184	-9.34212	-3.66916	-9.91652
							-6.43736	-10.0197	-6.1045	-11.1918	-6.83971	11.5004
							-10.1165	-9.04001	-5.80339	-11.7334	-7.83754	11.4377
							-10.8863	-6.60987	-5.43838	-8.12515	-6.22489	-9.25315
							-9.65823	-6.26282	-3.93733	-11.9327	-5.16198	11.6071
							-10.6849	-10.9821	-5.12434	-11.4365	-8.40448	-10.083
							-9.50058	-5.72246	-3.74617	-12.2886	-9.32354	11.8215
							-7.95926	-8.47081	-4.73672	-10.5103	-4.1735	-10.7828
							-9.07401	-10.465	-3.2777	-8.96323	-6.66762	11.5863
							-10.0287	-7.55988	-4.28239	-8.55023	-6.13412	11.7934
							-10.5367	-5.99287	-3.03216	-12.3169	-6.47709	11.7024
							-9.353	-8.67148	-3.80974	-11.6318	-8.07702	11.719
							-6.18836	-6.7924	-3.33028	-7.49168	-4.94928	-9.14317
							-6.20604	-5.13664	-2.86831	-11.0674	-6.52965	-10.2809
							-6.77381	-8.94015	-2.53469	-9.46723	-6.08542	11.5875
							-7.15693	-5.48291	-2.35687	-7.13571	-6.17691	-10.787
							-8.80699	-9.65365	-2.1724	-12.3196	-6.05592	11.4929
							-10.3204	-10.6448	-2.14448	-12.4111	-6.23676	11.7393
							-9.88068	-9.11717	-1.98232	-9.7364	-5.16908	11.8845
							-9.75187	-7.24411	-1.8746	-10.0623	-6.64479	11.7005
							-10.0395	-6.14207	-1.79779	-10.7378	-7.63689	-8.93199
							-11.0281	-7.7623	-1.77297	-11.2841	-5.65055	-10.8419
							-10.5878	-10.0063	-1.73157	-12.2323	-6.72899	-9.63252
							-11.4264	-8.30275	-1.71402	-12.0377	-6.45452	-10.275
							-6.07102	-6.80976	-2.01532	-11.8334	-6.43189	11.6631
							-8.56043	-9.08273	-5.89867	-11.5301	-6.57302	11.2239
							-7.41672	-5.60839	-6.45906	-12.4219	-6.60832	11.4754
							-10.9675	-4.60114	-6.9577	-10.2122	-5.79151	12.0836
							-6.08703	-6.16202	-4.45411	-12.5002	-7.49411	-8.98459
							-10.45	-7.80291	-2.2652	-8.47201	-6.80253	-10.632
							-9.61544	-8.41065	-3.54284	-11.2218	-7.24286	11.6617
							-10.6928	-10.2541	-3.44896	-12.0576	-7.40435	11.2702
							-10.2258	-9.2507	-5.65479	-12.4698	-6.07257	-10.0375
							-8.01153	-4.89798	-1.66437	-11.6652	-6.904	11.5388
							-8.99791	-7.11812	-2.7729	-12.2583	-7.14055	11.9909
							-9.85655	-8.49993	-4.92562	-7.34429	-8.35369	12.3019
							-11.5026	-7.95525	-2.069	-11.8591	-7.2652	-9.13128
							-7.67162	-6.5005	-1.85477	-8.9948	-8.76678	-11.2017
							-6.58082	-9.51333	-4.06022	-10.8692	-7.69781	-10.6521
							-11.3891	-7.31291	-1.99439	-7.94768	-8.00393	12.4758
							-6.47724	-5.44424	-7.1428	-9.57223	-7.63721	-11.7984
							-11.0011	-8.82624	-1.81875	-6.62954	-7.16286	-10.5412
							-10.1482	-8.47689	-6.70295	-12.46	-7.20072	-9.93027
							-9.27791	-9.80875	-2.44915	-12.505	-8.57835	-9.36384
							-11.2143	-7.55147	-5.31879	-12.5276	-7.10687	-11.2862
							-6.85719	-6.01898	-3.26411	-9.77873	-8.3996	12.5708
							-10.6639	-9.41939	-6.92669	-11.3432	-7.40586	-12.0027
							-11.3376	-8.56781	-3.47766	-12.4395	-8.10157	-11.2397
							-6.22152	-4.11197	-4.01859	-7.42425	-7.80614	-9.67478
							-10.4912	-8.95461	-5.10924	-10.1032		12.6207
							-6.06606	-7.95764	-2.19517	-11.6597		-10.7128
							-11.7259	-6.4709	-5.92784	-12.0233		-11.9571
							-10.9177	-4.45865	-1.99523	-11.8432		-12.6168
							-8.23766	-7.02736	-3.70472	-10.8267		-11.5556
							-6.64333	-7.49848	-4.63113	-12.2122		-10.0273
							-9.56333	-8.39399	-3.05362	-10.4797		-12.5187
							-11.6336	-5.10433	-2.02924	-12.4835		-10.9358
							-7.01008	-8.05157	-2.60346	-10.9965		-12.3507
							-11.5951	-5.74197	-6.81853	-8.50324		-12.0997
							-8.63892	-9.30882	-7.34598	-7.94085		-11.761
							-10.4287	-8.71791	-5.04573	-12.4415		-10.4027
							-9.93901	-7.51841	-5.60832	-12.3736		-10.8909
							-11.4731	-6.00152	-3.44778	-11.9706		-11.3408
							-10.2326	-8.27583	-3.66916	-11.3524
							-7.10265	-3.64406	-2.39253	-11.5676
							-6.21117	-6.5558	-7.16194	-9.31307
							-11.3737	-7.71822	-3.98493	-11.1226
							-10.8292	-8.35052	-3.03779	-8.84852
							-11.2762	-7.97	-4.79376	-6.45065
							-11.07	-4.23612	-7.03579	-9.61158
							-11.7603	-6.75411	-4.13797	-6.08535
							-6.4373	-5.23073	-2.82121	-11.7166
							-6.28815	-7.69648	-5.95349	-10.4326
							-7.10674	-8.77054	-6.74844	-12.3289
							-11.8146	-6.98342	-7.3673	-7.17629
							-9.38379	-7.2755	-4.30323	-10.6298
							-7.62388	-7.74389	-4.1735	-12.3444
							-11.7769	-3.59365	-3.77361	-12.1503
							-11.3516	-4.45879	-3.25701	-8.40161
							-11.9108	-5.60106	-6.40641	-9.84556
							-6.07333	-7.30801	-5.14929	-10.7438
							-10.6992	-8.15162	-7.33261	-7.95295
							-7.48567	-7.55867	-6.25331	-11.1984
							-6.60869	-7.64146	-6.99582	-11.3893
							-7.84172	-7.78195	-4.26073	-11.8715
							-11.1513	-6.04754	-5.71667	-10.9656
							-8.98498	-8.22484	-3.75281	-7.29674
							-11.7178	-7.2859	-6.52097	-8.93499
							-10.8879	-3.58004	-4.94928	-9.90364
							-10.4818	-6.52471	-4.76011	-12.1496
							-11.8911	-6.78865	-4.23506	-10.1402
							-6.62648	-5.10031	-6.64538	-10.3828
							-8.56278	-7.22484	-5.61274	-6.41164
							-12.0296	-4.39371	-5.16908	-11.2926
							-11.7046	-7.28713	-4.7469	-12.0302
							-6.09263	-7.41009	-5.94921	-6.78072
							-9.72874	-7.12509	-6.06752	-11.4684
							-12.0913	-6.08377	-5.31389	-9.23316
							-11.9132	-5.36614	-5.65055	-5.57347
							-6.21956	-7.69072	-5.79989	-8.32317
							-7.1084	-6.73059	-5.97052	-10.7575
							-10.0718	-3.461	-5.79151	-7.81516
							-11.4666	-5.69275		-5.8178
							-7.98751	-6.40251		-7.365
							-10.877	-7.15468		-9.35964
							-12.1146	-6.84255		-9.67006
							-6.24746	-4.90665		-11.7319
							-12.0265	-6.78616		-10.9657
							-9.34212	-6.68579		-10.3753
							-12.1413	-5.94373		-11.4125
							-11.1918	-6.68474		-11.8894
							-11.7334	-5.71555		-10.6442
							-8.12515	-6.48498		-10.0136
							-11.9327	-6.61086		-6.82798
							-11.4365	-5.28132		-8.74548
							-12.2886	-7.20105		-10.8711
							-8.47145	-6.21984		-9.55054
							-6.23339	-3.43641		-11.0487
							-10.5103	-6.62019		-10.304
							-12.0496	-4.86621		-8.14552
							-8.96323	-4.38217		-11.3125
							-8.55023	-5.3904		-5.10263
							-12.3169	-5.81999		-9.12772
							-11.9642	-6.30246		-11.5625
							-11.6318	-6.22916		-6.12208
							-7.49168	-6.06604		-7.45148
							-6.93162	-5.40481		-10.4128
							-9.05195	-6.20686		-9.64544
							-11.9147	-6.75757		-11.3307
							-11.0674	-6.1888		-5.57392
							-9.46723	-4.99964		-6.83968
							-6.06158	-3.42867		-9.37178
							-7.13571	-6.08644		-5.13718
							-7.8189	-4.52324		-8.52491
							-6.7557	-6.322		-10.1259
							-6.39228	-5.74669		-10.4614
							-12.3196	-6.06367		-9.83812
							-12.4111	-5.93605		-9.66714
							-6.28439	-5.96013		-10.5995
							-9.7364	-5.84375		-8.08193
							-10.0623	-4.94603		-10.7822
							-10.7378	-5.25367		-9.03287
							-11.2841	-5.40235		-11.1778
							-9.66428	-5.87815		-9.79733
							-12.2323	-4.53594		-7.31796
							-6.06421	-5.69648		-8.49219
							-12.0377	-3.90886		-10.8581
							-11.8334	-6.37845		-9.16322
							-11.5301	-5.01906		-4.72474
							-12.2712	-5.75903		-6.8264
							-6.0032	-5.57036		-9.94705
							-6.32003	-3.43823		-6.00002
							-11.9044	-5.71938		-8.50672
							-8.34938	-5.47688		-7.32067
							-12.4219	-4.11933		-4.94687
							-7.12376	-5.65917		-10.2492
							-10.2394	-5.52862		-9.23652
							-12.0488	-4.63891		-10.8248
							-5.99114	-5.28124		-8.68243
							-6.05759	-5.3014		-7.53832
							-10.2122	-6.08013		-7.91152
							-12.5002	-4.99975		-9.41348
							-8.47201	-5.2758		-9.00466
							-11.2218	-5.37735		-9.26225
							-12.0576	-3.76413		-6.20812
							-12.4698	-4.6847		-9.55559
							-11.6652	-3.42129		-9.87219
							-12.2583	-4.22585		-5.35503
							-7.34429	-5.44021		-10.3413
							-9.55472	-5.19642		-9.544
							-11.8591	-5.25502		-10.4525
							-8.9948	-5.12918		-6.28496
							-5.9344	-4.95848		-4.40781
							-10.8692	-3.87325		-4.92173
							-7.76881	-5.27872		-8.17063
							-11.7168	-4.2527		-8.53464
							-10.6531	-5.23593		-8.82204
							-12.2754	-4.83397		-7.83929
							-8.59291	-5.82299		-9.90009
							-7.94768	-4.60301		-4.61943
							-9.57223	-3.43592		-8.60424
							-6.43876	-5.03654		-7.00515
							-5.94313	-4.81104		-10.1099
							-6.62954	-5.02755		-9.11395
							-12.46	-4.06576		-8.74763
							-12.505	-4.3081		-8.86657
							-12.5276	-3.98445		-5.82864
							-9.77873	-4.56982		-6.38629
							-11.3432	-5.04799		-5.39448
							-6.04077	-4.66979		-8.04914
							-5.93345	-4.67988		-7.27408
							-12.4395	-5.61696		-7.64224
							-6.05603	-3.46316		-5.94131
							-6.85933	-4.38997		-8.14662
							-7.42425	-4.8233		-4.68949
							-5.87347	-4.37315		-7.73758
							-10.1032	-4.00715		-9.46904
							-11.7932	-5.15245		-9.75998
							-11.6597	-3.74073		-4.24361
							-12.0233	-4.86083		-9.01019
							-8.83742	-3.84206		-8.72845
							-11.0962	-4.76887		-8.27206
							-11.8432	-4.66619		-8.39962
							-5.76616	-4.12285		-7.17165
							-10.8267	-4.59332		-4.80651
							-12.031	-4.2647		-4.36765
							-12.2122	-4.3249		-5.42153
							-10.4797	-4.75275		-9.41773
							-12.4835	-3.72652		-7.8998
							-9.92267	-5.48398		-6.82478
							-10.9965	-4.50827		-5.96136
							-7.25505	-4.39616		-6.53233
							-8.50324	-4.22767		-5.71003
							-6.48196	-3.47506		-4.96207
							-12.1392	-4.74435		-8.94727
							-5.75975	-4.94636		-7.27659
							-7.94085	-4.41753		-6.17289
							-12.4415	-4.21637		-7.46181
							-7.86457	-3.82448		-4.48256
							-6.13893	-4.61629		-6.94508
							-12.3736	-4.68119		-9.09906
							-5.66649	-4.0127		-8.29015
							-11.4129	-3.57775		-7.6626
							-8.95245	-4.02001		-8.51552
							-11.9706	-4.53634		-6.63741
							-11.4086	-4.31288		-4.29073
							-11.3524	-4.29269		-7.84792
							-11.5676	-3.34997		-5.74664
							-5.8396	-5.3972		-6.30632
							-5.98624	-4.66661		-7.36016
							-9.31307	-4.75979		-4.30936
							-11.1226	-4.02861		-5.35596
							-8.84852	-4.02206		-7.58941
							-11.8692	-3.57916		-6.82408
							-6.45065	-3.42527		-4.65239
							-5.54125	-4.20466		-4.33808
							-11.6451	-4.53485		-8.49719
							-9.61158	-3.1875		-4.8662
							-6.08535	-4.52873		-8.7626
							-11.7166	-4.36207		-6.62289
							-10.4326	-4.03448		-5.83524
							-12.3289	-3.40706		-7.78794
							-7.17629	-3.68987		-8.14951
							-10.6298	-4.5843		-6.90435
							-5.43903	-3.83158		-6.32411
							-12.3444	-3.94478		-6.11842
							-6.15266	-3.9408		-4.40074
							-6.45124	-5.37086		-5.20977
							-7.03397	-4.36914		-5.39945
							-12.1503	-4.14037		-6.92218
							-8.40161	-4.76846		-7.81244
							-9.29258	-2.94202		-4.35536
							-5.48575	-3.47847		-8.44013
							-5.7383	-4.46835		-6.52946
							-9.84556	-3.89599		-4.46715
							-10.7438	-3.99536		-4.88896
							-12.1073	-3.66775		-8.10908
							-8.43788	-3.84446		-6.30028
							-11.501	-4.30765		-5.62362
							-7.95295	-3.16342		-6.88813
							-11.1984	-4.27707		-6.05421
							-10.8357	-4.51819		-5.87132
							-11.3893	-4.43594		-6.48489
							-6.00406	-4.07166		-7.31731
							-11.8715	-5.38851		-4.33831
							-10.1232	-2.68321		-4.49586
							-7.65571	-3.20992		-5.27498
							-10.9656	-2.8646		-6.95788
							-5.78627	-4.45527		-5.60857
							-11.8052	-3.80346		-8.12768
							-7.29674	-3.44473		-7.72894
							-8.93499	-3.83878		-4.82054
							-11.5001	-4.418		-4.44684
							-5.47724	-4.92646		-5.52495
							-9.90364	-2.45887		-4.86958
							-10.9934	-3.86422		-4.37435
							-12.1149	-4.10156		-4.58398
							-5.90242	-2.94331		-5.96799
							-6.51598	-4.22501		-5.76825
							-9.47987	-4.4658		-5.21753
							-12.1496	-4.09738		-5.53547
							-10.1402	-3.2154		-4.68221
							-10.3828	-3.90219		-6.75982
							-6.41164	-4.33866		-6.40467
							-8.64206	-4.26997		-7.83111
							-11.2926	-2.55043		-5.22068
							-12.0302	-3.75851		-7.02517
							-11.0722	-2.28236		-4.93266
							-6.78072	-5.36655		-4.4723
							-5.08766	-3.97687		-4.42222
							-12.0519	-3.69462		-4.74521
							-11.4684	-2.14382		-4.64101
							-9.23316	-4.5424		-4.58975
							-5.57347	-3.11582		-5.21822
							-6.1265	-3.75521		-7.52959
							-8.32317	-5.06835		-5.34288
							-11.5018	-2.02117		-4.59241
							-10.7575	-4.34268		-6.29635
							-7.20282	-2.27511		-4.51908
							-11.5171	-4.45328		-5.83579
							-7.81516	-1.90891		-4.89902
							-7.81114	-4.22984		-4.45626
							-5.8178	-4.2087		-5.5471
							-5.17105	-3.58933		-6.83858
							-7.365	-4.06855		-6.46362
							-5.40039	-2.02825		-4.6876
							-11.1908	-2.53929		-4.54515
							-9.35964	-3.83337		-7.18823
							-9.67006	-4.63195		-4.4543
							-11.7319	-4.05807		-4.72782
							-6.3575	-5.38253		-4.55479
							-5.67082	-4.48876		-5.94149
							-10.7117	-4.24678		-4.53196
							-10.9657	-2.92503		-4.62603
							-11.6339	-4.56784		-4.54089
							-10.3753	-4.42517		-4.87677
							-5.14131	-3.94871		6.53964
							-6.59129	-1.8144		-4.5286
							-4.87182	-3.41875		-4.27414
							-8.93327	-2.43411		-4.27515
							-11.4125	-4.3439		-4.73536
							-11.8894	-4.20074		6.80381
							-9.52168	-4.85698		-4.55731
							-11.8654	-3.89588		-5.14487
							-10.0295	-4.59149		-4.11072
							-5.85473	-4.302		-4.14257
							-10.6442	-4.01108		6.05902
							-10.0136	-2.12122		-4.33616
							-6.82798	-2.77926		-4.74837
							-10.5525	-3.84435		-5.34632
							-11.7013	-5.2544		-4.17701
							-4.83278	-4.09403		-4.663
							-6.10753	-3.77772		6.38737
							-8.74548	-4.46545		5.65188
							-11.3848	-2.46045		-4.84397
							-10.8711	-1.95635		-3.8373
							-9.55054	-4.60371		-4.1908
							-8.23291	-4.02869		-4.50831
							-11.0487	-4.47475		-4.03039
							-6.2731	-4.18291		-4.72843
							-10.304	-4.16835		4.90907
							-4.74814	-4.64847		-3.76548
							-8.14552	-4.93001		-3.85688
							-6.77963	-3.22925		-3.73615
							-10.7325	-4.63575		5.92288
							-11.0703	-1.68847		-4.37066
							-11.3125	-4.33296		5.08432
							-5.10263	-3.92996		-3.6992
							-10.7561	-4.08114		-4.26158
							-9.12772	-5.28378		-5.01164
							-7.42699	-3.5991		-4.90908
							-8.63759	-4.06895		-4.92188
							-5.57122	-2.87604		-3.57927
							-11.5625	-4.36871		5.41619
							-6.12208	-2.26497		-3.4019
							-7.45148	-3.97268		-3.81844
							-10.4128	-1.8194		4.53626
							-9.64544	-4.58219		-3.90001
							-5.90647	-4.09464		-3.43938
							-11.3307	-4.22679		-4.72828
							-5.57392	-2.17927		-4.08543
							-9.42049	-4.00836		-3.22042
							-6.51313	-4.61598		-3.21903
							-6.83968	-4.63163		4.91075
							-11.5346	-4.47174		-5.21361
							-9.37178	-4.52426		-3.36982
							-4.81365	-4.40604		-4.38663
							-10.0378	-2.69738		-3.51399
							-5.13718	-3.75509		-5.15637
							-8.52491	-4.14847		4.39493
							-10.1259	-5.28887		-4.79393
							-10.4614	-3.25534		-3.33091
							-9.83812	-4.00616		-3.52277
							-9.66714	-4.88225		-3.03452
							-6.88043	-4.5124		-3.72799
							-11.2595	-2.48014		-4.09446
							-10.5995	-4.36413		-3.12471
							-10.1515	-1.91737		-5.39289
							-11.4373	-4.57329		-3.13693
							-11.2177	-4.63411		3.90366
							-6.26657	-4.46588		-5.07583
							-4.43481	-4.62928		-4.50654
							-8.08193	-4.61784		3.54342
							-8.94051	-4.30658		-5.41787
							-10.7822	-4.54811		-4.03484
							-10.8714	-4.52108		-3.05813
							-9.03287	-4.20495		-3.68398
							-5.05101	-4.43417		-3.36565
							-10.4792	-4.39261		3.30542
							-11.1778	-4.27536		-5.25111
							-9.79733	-4.06002		-4.23883
							-4.41779	-4.21688		-3.2307
							-7.31796	-4.04346		-3.96318
							-4.54395	-4.13132		-3.20016
							-7.73658	-4.05809		-4.81592
							-8.49219	-4.0141		-3.7129
							-10.4972	-3.91287		-3.5138
							-6.0907	-4.17069		-3.27666
							-10.8581	-4.20552		-4.39747
							-9.16322	-3.72666		-3.49747
							-4.72474	-3.63713		-4.21332
							-4.37701	-4.41638		-3.81662
							-4.25004	-4.45581		-4.1468
							-5.43468	-3.37615		-4.02467
							-7.03124	-4.60705		-6.91441
							-6.8264	-3.0797		-6.56774
							-11.1	-4.7113		-7.2972
							-9.43626	-2.78163		-6.19842
							-9.94705	-4.81532		-7.28033
							-8.24227	-2.49574		-5.8363
							-6.00002	-4.97342		-7.16917
							-10.0197	-2.2874		-7.20562
							-11.1779	-2.16335		-6.98132
							-8.50672	-1.98232		-5.77922
							-7.32067	-5.23843		-7.30104
							-9.04001	-2.01532		-6.63229
							-4.94687	-4.36718		-7.21769
							-10.2492	-2.57462		-6.21152
							-10.3264	-4.46613		-5.92872
							-6.60987	-4.82553		-7.68639
							-9.23652	-4.14868		-7.19423
							-6.26282	-3.32867		-6.89175
							-10.8248	-5.2442		-7.26427
							-10.9821	-4.34474		-6.52726
							-8.68243	-3.77746		-5.87971
							-5.72246	-2.84241		-8.26487
							-10.5237	-4.41708		-6.29453
							-7.53832	-4.51341		-6.19799
							-7.91152	-4.61524		-8.96875
							-9.78714	-4.59552		-7.85504
							-9.41348	-4.57322		-5.59035
							-9.00466	-4.04798		-7.4324
							-9.26225	-2.36119		-6.70702
							-8.47081	-4.22598		-6.9842
							-6.20812	-4.18798		-7.56263
							-4.25642	-4.52804		-8.54415
							-10.9359	-2.069		-7.35295
							-9.55559	-4.27223		-6.55052
							-9.87219	-2.59985		-9.70189
							-10.9573	-4.35059		-6.29352
							-10.6166	-3.13324		-7.30424
							-10.465	-4.45749		-6.77141
							-5.35503	-3.65495		-8.31427
							-10.3413	-5.27011		-5.63691
							-7.55988	-4.04869		-10.4737
							-5.99287	-4.16002		-8.00179
							-3.96388	-4.29487		-7.85708
							-10.9203	-2.19517		-9.51329
							-4.01845	-4.50712		6.86612
							-8.67148	-3.39903		-7.69641
							-9.544	-5.00466		-7.24113
							-4.72488	-4.50282		-10.1032
							-10.4525	-4.19404		-9.06413
							-6.28496	-4.60934		-7.88116
							-6.7924	-4.39887		-11.3713
							-4.40781	-4.14108		-7.60762
							-5.13664	-4.75081		6.76433
							-10.8332	-2.48566		-6.20725
							-10.6773	-2.89953		-5.67072
							-4.92173	-4.37393		-7.16336
							-8.94015	-3.78264		-8.72718
							-10.6569	-4.00682		-10.934
							-8.17063	-5.26773		-9.86237
							-8.53464	-4.21961		-12.1839
							-5.48291	-3.17212		-8.08722
							-10.1284	-2.72409		-7.81491
							-8.82204	-4.03508		-8.62785
							-7.83929	-4.18296		-10.7381
							-9.65365	-4.37352		7.03115
							-10.4325	-3.81708		-7.66043
							-4.11897	-4.97573		7.27952
							-9.90009	-4.08393		-9.46114
							-4.61943	-4.18892		-8.47531
							-10.6448	-2.96134		-5.7016
							-9.11717	-3.52044		-11.8989
							-8.60424	2.55715		-12.9929
							-7.24411	-4.42649		-6.53286
							-3.7547	-4.25428		-9.23084
							-6.14207	-4.31197		-11.4019
							-9.57546	-3.26574		-10.3202
							-7.7623	-4.56352		-7.6396
							-7.00515	-4.22145		-12.592
							-10.1099	-5.31912		-8.18073
							-9.11395	-3.952		-8.39655
							-10.311	-4.872		-11.0165
							-4.00661	-3.91148		-9.83349
							-8.74763	-3.06626		-13.7791
							-8.86657	2.76057		-5.66009
							-5.82864	3.88003		-8.09796
							-6.38629	-3.56882		-8.91898
							-3.76154	-3.9828		-6.09455
							-5.39448	4.01015		-13.4373
							-10.0063	2.57109		-10.3442
							-8.30275	4.13956		7.54525
							-8.04914	2.91079		-7.18618
							-3.57049	-4.05081		-6.61056
							-7.27408	2.66083		-12.4383
							-6.80976	-5.10818		-9.53968
							-10.0443	-4.07686		-9.90832
							-4.48498	-3.29786		-8.9925
							-7.64224	-4.12763		-14.4988
							-10.4374	2.75411		-8.8913
							-5.94131	3.55703		-5.58767
							-10.4766	-4.40323		-13.3811
							-8.14662	-5.3202		-14.0255
							-3.9543	2.82707		-11.442
							-4.68949	-3.86481		-6.00852
							-7.73758	-3.0056		-9.77965
							-9.08273	-3.8908		-12.0485
							-9.46904	3.88861		-7.0788
							-9.75998	-3.77703		-13.0203
							-10.299	-3.28707		-8.09667
							-5.60839	-3.79092		-10.8838
							-4.24361	3.93789		-15.1174
							-9.01019	-4.63994		-10.445
							-8.72845	-3.14152		-7.66125
							-3.56935	3.69918		-5.49923
							-4.60114	3.56297		-8.68772
							-6.16202	-2.89522		-6.70094
							-7.80291	-5.08774		-5.83532
							-8.41065	-3.87184		-9.16512
							-8.27206	-4.16737		-14.385
							-10.2541	3.30171		-9.93647
							-10.358	-3.73228		-15.7106
							-9.3935	-4.79342		-12.958
							-9.2507	-3.02037		-13.7916
							-10.1827	-3.12176		-5.40349
							-8.39962	-2.93283		-10.6081
							-4.89798	-5.33105		-9.65003
							-7.17165	-4.45517		-11.1953
							-7.11812	3.6534		-11.7463
							-4.80651	3.73753		-7.41254
							-9.92476	3.50428		-6.29552
							-4.36765	-3.02509		-8.56494
							-9.90319	-3.6308		-10.4267
							-5.42153	-3.87512		-5.59573
							-9.41773	3.18774		-8.20257
							-7.8998	3.31198		-15.5658
							-6.82478	-3.6151		-16.1908
							-3.23954	-3.62248		-10.1602
							-8.49993	-3.06209		-13.9162
							-5.96136	-2.93629		-9.28413
							-10.1396	-4.93211		-6.94299
							-7.95525	-3.53313		-5.90749
							-6.53233	-4.67477		-14.7242
							-5.71003	-5.24516		-12.5217
							-6.5005	-4.09318		-10.6638
							-10.185	-3.65042		-11.144
							-3.92692	3.00578		-13.617
							-9.51333	3.43825		-9.88701
							-4.96207	2.92624		-11.6955
							-8.94727	-2.8997		-16.1776
							-7.27659	-3.46689		-8.03064
							-6.17289	-3.41059		-5.4395
							-7.31291	3.26662		-12.2797
							-7.46181	-2.9137		-16.578
							-4.48256	3.35941		-5.65666
							-5.44424	2.98321		-15.5842
							-3.92231	-2.85902		-13.2995
							-8.82624	-2.7153		-9.11296
							-3.3674	-3.63504		-8.6405
							-6.94508	-4.13484		-6.41282
							-8.47689	-4.86004		-10.6422
							-9.09906	3.11744		-11.1131
							-8.29015	-5.26558		-12.8805
							-9.89483	-2.85444		-16.1314
							-9.89316	-3.24195		-15.329
							-9.19156	-4.43115		-9.77889
							-9.80875	-3.17022		-11.6783
							-7.55147	-3.82924		-16.8817
							-7.6626	-2.63496		-7.53448
							-8.51552	2.53689		-16.6044
							-6.63741	3.05634		-5.99078
							-6.01898	2.87355		-6.985
							-9.96699	2.45562		-12.1922
							-4.29073	2.48562		-14.5271
							-9.41939	2.58728		-8.55408
							-9.93119	-4.87995		-5.71822
							-7.84792	2.84133		-13.6786
							-9.34389	-2.76305		-10.4825
							-8.56781	-4.08551		-9.30816
							-4.11197	-3.17002		-15.0914
							-5.74664	-3.03796		-5.48052
							-6.30632	-5.24014		-11.1264
							-8.95461	-2.28523		-16.5324
							-3.57979	-2.8964		-14.3214
							-7.36016	-3.35629		-16.0311
							-4.30936	-3.57692		-17.0937
							-9.90508	2.42036		-11.7495
							-3.10242	2.10478		-6.27764
							-5.35596	-4.49192		-13.2405
							-2.88399	2.49195		-9.81577
							-7.58941	-1.98227		-12.5358
							-7.95764	2.64092		-16.9583
							-9.51295	-2.44803		-7.2228
							-6.4709	-4.86753		-8.6663
							-6.82408	1.90455		-10.3884
							-4.65239	2.08956		-9.17748
							-3.4305	-2.8298		-10.9853
							-4.33808	-3.86769		-14.2493
							-8.49719	-2.6234		-17.2598
							-4.45865	-5.12439		-7.98248
							-4.8662	-3.07411		-5.81054
							-8.7626	-4.1718		-6.76048
							-6.62289	2.61161		-11.6354
							-3.06764	-3.39122		-15.6353
							-7.02736	-1.81558		-14.9857
							-5.83524	1.60779		-16.2061
							-7.78794	-1.5503		-16.7523
							-9.52363	-4.5308		-5.47165
							-7.49848	1.88		-17.3572
							-8.14951	2.17648		-17.2519
							-4.1445	-2.47105		-12.6931
							-6.90435	1.42579		-6.34631
							-9.63585	-4.99228		-13.9856
							-9.67796	-3.83626		-8.5754
							-8.39399	2.29431		-12.2758
							-6.32411	-1.16213		-11.2429
							-5.10433	-2.73952		-13.3157
							-3.61042	-1.87791		-7.39076
							-9.71614	-3.28538		-9.28228
							-9.01649	-2.97616		-8.09467
							-8.05157	-4.34955		-16.0222
							-5.74197	1.8041		-15.6243
							-6.11842	-2.51947		-16.5184
							-9.30882	-1.3126		-17.3884
							-4.40074	-2.27332		-10.4003
							-3.27509	0.796359		-14.5323
							-5.20977	-1.99164		-5.98457
							-5.39945	2.03145		-17.3578
							-6.92218	-4.11988		-11.9467
							-9.61098	1.16332		-15.1271
							-8.85022	-4.91654		-13.8342
							-7.81244	-3.15266		-12.6438
							-9.24152	-3.61826		-6.35349
							-4.35536	-0.535534		-5.46598
							-8.71791	-2.92797		-8.49614
							-8.44013	-2.72404		-17.3533
							-6.52946	-1.47772		-16.8161
							-4.46715	1.61472		-17.3569
							-7.51841	2.27302		-6.75676
							-6.00152	-2.09337		-17.0298
							-9.02955	-4.02753		-16.438
							-8.27583	-4.43007		-7.98297
							-4.88896	0.342802		-15.3915
							-8.10908	-4.90901		-14.323
							-6.30028	-1.82071		-15.8808
							-3.64406	-3.41827		-11.2543
							-6.5558	-0.977168		-10.4573
							-7.71822	-2.5852		-13.087
							-2.98719	1.18819		-17.2055
							-5.62362	0.791023		-14.8817
							-8.35052	-0.212516		-17.2105
							-3.81543	2.13268		-5.98983
							-2.67298	-2.89272		-9.8228
							-7.97	-3.86368		-12.3676
							-6.88813	2.49694		-7.33058
							-9.33635	1.58061		-16.633
							-6.05421	-4.68781		-8.57016
							-4.23612	-1.35018		-5.40895
							-5.87132	-4.43844		-13.756
							-6.48489	-1.995		-17.1712
							-7.31731	-0.666051		-11.8633
							-9.38634	-3.27886		-9.34326
							-9.23848	-4.93598		-15.7052
							-4.33831	-2.84976		-16.9605
							-6.75411	0.748193		-12.9024
							-4.49586	2.17216		-17.0821
							-5.27498	-4.25383		-10.6229
							-6.95788	-3.69382		-16.9797
							-5.23073	1.48279		-14.5759
							-5.60857	-0.813668		-15.0659
							-8.81186	-1.70587		-16.7578
							-9.38233	-1.4219		-16.0464
							-8.12768	-4.64664		-11.3212
							-7.69648	-2.01993		-5.73374
							-8.77054	2.16093		-13.4003
							-4.70941	-5.02296		-7.99449
							-2.60774	-1.15665		-6.26478
							-6.98342	-3.41042		-16.8595
							-8.52214	2.73927		-13.9215
							-7.72894	-1.21186		-16.3377
							-4.82054	-4.34024		-8.89676
							-7.2755	1.55543		-6.88018
							-4.44684	-3.22306		-16.5915
							-7.74389	-3.85859		-12.2165
							-8.73247	-1.66753		-5.40926
							-3.59365	-4.15776		-16.8086
							-3.59221	-4.88078		-9.91306
							-4.45879	2.24261		-15.4773
							-5.60106	-1.45257		-16.7554
							-5.52495	-2.09769		-13.0094
							-4.86958	2.84321		-16.6107
							-4.37435	-5.18583		-10.9576
							-4.58398	-1.63383		-7.41525
							-5.96799	-1.79477		-13.9279
							-5.76825	-3.91935		-15.895
							-7.30801	-4.93565		-16.14
							-8.15162	-4.63634		-16.5752
							-9.10699	-1.98377		-14.6185
							-3.01957	-4.36351		-16.167
							-5.21753	-1.87702		-16.4203
							-2.77565	2.72104		-12.465
							-7.55867	-2.3213		-11.692
							-5.53547	-2.20695		-7.85865
							-4.68221	-3.66356		-5.92933
							-8.81249	-5.41527		-8.49139
							-9.10229	-2.05343		-15.2914
							-6.75982	-5.01029		-9.28719
							-6.40467	-4.72949		-5.44961
							-8.91451	-4.20057		-11.044
							-7.83111	-5.36652		-16.2579
							-7.64146	-3.38651		-6.87948
							-7.78195	-2.10844		-15.9575
							-5.22068	-2.25623		-16.0648
							-9.1353	-2.35197		-6.3933
							-7.02517	-4.61289		-13.7654
							-6.04754	-3.16818		-13.008
							-3.22848	-2.81417		-15.6567
							-8.22841	-5.6745		-12.1176
							-8.97685	-4.12022		-9.902
							-4.93266	-2.23807		-7.27045
							-4.4723	-2.67721		-14.8137
							-8.72483	-2.40803		-15.9586
							-4.42222	-4.63024		-15.6386
							-8.22484	-5.31182		-15.236
							-7.2859	-3.76164		-8.03704
							-4.74521	-2.59759		-13.8761
							-3.58004	-2.50485		-11.5344
							-4.64101	-5.12737		-8.59986
							-4.58975	-2.42642		-15.6731
							-3.17055	-3.3661		-15.144
							-4.02098	-5.6386		-13.2972
							-6.52471	-5.94242		-6.83685
							-8.51514	-2.44398		-15.3433
							-5.21822	-4.36093		-12.5659
							-6.78865	-2.49887		-15.4713
							-7.52959	-5.08551		-5.47232
							-9.04036	-3.35978		-10.6621
							-2.95629	-2.99653		-5.8969
							-3.18307	-2.59833		-9.01397
							-8.70927	-2.76427		-14.1542
							-8.97036	-3.89038		-9.84064
							-5.34288	-5.63453		-15.0487
							-5.02364	-2.67603		-14.6083
							-5.10031	-5.05628		-15.3111
							-4.59241	-6.01202		-15.1655
							-6.29635	-2.65918		14.6086
							-7.22484	-3.45632		-7.43034
							-4.51908	-6.20398		-8.13531
							-5.83579	-4.73472		-13.2754
							-4.89902	-5.39609		-14.7623
							-4.39371	-2.70485		-11.8445
							-4.45626	-3.3025		-14.9369
							-2.85666	-6.02604		-12.6257
							-7.28713	-2.91306		-14.7358
							-8.2469	-3.86095		-14.761
							-7.41009	-4.56197		-14.3749
							-5.5471	-3.24668		-10.7822
							-7.12509	-2.84224		-6.56712
							-8.92649	-5.72079		-14.7352
							-6.08377	-6.45684		-13.5979
							-6.83858	-4.33725		-10.0026
							-8.85481	-3.75449		-14.568
							-6.46362	-2.86107		-14.3272
							-2.54135	-2.94342		14.0924
							-4.6876	-2.85204		-5.57792
							-4.54515	-5.29031		-9.32894
							-5.36614	-3.16254		-6.97761
							-8.73768	-4.20692		-12.0915
							-7.75217	-6.28702		-8.26594
							-4.89973	-3.76706		-14.052
							-7.69072	-2.91361		-6.22481
							-8.95253	-3.42037		-14.2277
							-6.73059	-5.10954		-13.6777
							-8.53102	-6.69506		-14.2324
							-8.35155	-5.87848		-14.116
							-3.461	-3.01644		-12.7253
							-7.18823	-4.81316		-7.48077
							-8.00775	-3.11218		13.9771
							-5.69275	-3.217		-10.3609
							-3.31876	-4.53003		13.5698
							-6.40251	-2.97274		-13.0723
							-4.4543	-3.66878		-13.4819
							-7.15468	-6.55195		-13.5837
							-4.72782	-4.33862		-13.6662
							-3.00832	-3.07493		-12.4436
							-5.14373	-6.9204		-11.1406
							-3.66542	-2.96266		-9.68713
							-8.46321	-3.14233		-9.00901
							-4.55479	-4.89419		13.4607
							-5.94149	-6.03804		13.5321
							-4.53196	-4.18977		-5.72411
							-6.84255	-5.3431		-8.46306
							-4.90665	-3.40023		-11.688
							-4.62603	-3.1392		-6.05235
							-4.54089	-2.98976		-12.8148
							-8.60065	-6.52753		12.9906
							-4.65262	-3.83724		-7.13126
							-3.7208	-4.81833		-7.67891
							-4.87677	-2.97687		-10.4288
							-3.15435	-7.11101		12.9761
							6.53964	-3.30276		-12.3309
							-8.83325	-5.93834		-12.9299
							-6.78616	-3.07908		-6.5572
							-4.5286	-5.30081		-12.6776
							-4.27414	-3.00747		-11.8363
							-6.68579	-3.0598		-8.02295
							-4.27515	-4.59755		12.8337
							-4.73536	-3.70207		12.7896
							-8.19828	-6.69551		-11.0416
							-7.41857	-3.26261		-12.1621
							-2.59835	-2.97212		-9.25275
							-5.94373	-4.32679		12.405
							6.80381	-7.28922		-8.51975
							-4.55731	-2.92323		12.3459
							-6.68474	-2.9734		12.3955
							-8.67612	-5.93843		-6.83222
							-5.14487	-5.44929		-10.1548
							-7.86373	-4.9581		-11.0651
							-5.71555	-3.15961		12.2144
							-8.63567	-6.65123		-7.29014
							-6.48498	-2.99631		-11.5006
							-7.05355	-3.02014		-6.14432
							-4.11072	-4.12959		-10.5872
							-6.61086	-3.67456		-11.8051
							-5.28132	-7.46527		12.0764
							-4.14257	-2.95751		-5.9211
							-7.20105	-4.85059		-7.83048
							6.05902	-5.59029		11.8039
							-5.22212	-3.21947		-11.2984
							-6.21984	-3.00214		11.5988
							-3.43641	-3.07436		-10.9005
							-8.62672	-4.15459		11.5354
							-4.33616	-6.26206		-9.51285
							-4.74837	-3.07714		11.5267
							-3.15452	-6.96943		-8.79475
							-5.01499	-7.62398		-9.96071
							-6.62019	-4.87255		-6.74427
							-8.6751	-5.62674		-8.02029
							-4.11641	-3.7924		-6.40168
							-4.86621	-3.39019		-11.0314
							-8.52761	-3.2224		-10.2639
							-4.38217	-3.31872		11.211
							-5.34632	-3.26143		-10.626
							-4.17701	-7.76207		11.1474
							-4.663	-5.64327		-7.52314
							-4.22485	-3.52465		-9.47392
							-3.86259	-4.77246		10.9579
							-8.7262	-3.81461		-8.76884
							-5.3904	-4.40363		-7.11594
							-2.83565	-6.6286		-6.20287
							6.38737	-7.8174		-9.89528
							5.65188	-5.89119		10.6079
							-8.02074	-4.38685		-8.14942
							-5.81999	-3.68938		-10.3351
							-4.91223	-3.87163		10.6306
							-4.84397	-4.31664		-6.65299
							-7.7127	-5.97585		10.324
							-2.89064	-7.78468		-9.71189
							-3.8373	-5.38212		-8.85728
							-6.30246	-6.93989		-9.28681
							-8.36834	-4.26919		-10.1091
							-7.27752	-7.72151		-6.915
							-4.1908	-5.30256		-7.74022
							-6.22916	-6.26717		10.0959
							-4.50831	-4.88959		-9.71471
							-6.9312	-7.57409		-7.27354
							-4.03039	-6.31129		-8.15605
							-4.72843	-4.98771		-8.90406
							-6.06604	-7.38173		-9.7576
							4.90907	-5.83488		-6.55333
							-3.76548	-7.28727		-9.10113
							-3.85688	-5.85312		-6.79523
							-3.73615	-7.31864		-9.68383
							-5.40481	-6.71665		-8.43086
							6.55802	-6.80883		-7.04594
							-6.20686	-7.52094		-7.64511
							-8.42974	-7.91371		-8.70596
							-6.75757			-9.20221
							-6.1888			-8.01692
							-5.10804			-9.30627
							-8.47882			-8.36811
							-8.42997			-8.80503
							-8.45083			-6.96751
							-4.38768			-7.43189
							-5.41913			-7.77491
							-4.99964			-8.95624
							-3.42867			-8.08163
							-6.08644			-8.66035
							5.92288			-7.38072
							-4.37066			-8.36921
							-4.52324			-7.73621
							-6.322			-8.06603
							-5.74669
							-8.18509
							-8.15761
							-6.06367
							5.08432
							-7.84163
							-7.51077
							-5.37641
							-3.6992
							-5.93605
							-3.04046
							-3.76235
							-4.26158
							-5.01164
							-4.90908
							6.17629
							-8.36011
							-3.12034
							-4.43818
							-4.92188
							-5.96013
							-5.84375
							-4.94603
							-4.88273
							-6.96643
							-3.57927
							5.41619
							-3.4019
							-8.22265
							-3.81844
							-5.25367
							4.53626
							-5.40235
							-3.90001
							-5.87815
							-4.53594
							-3.43938
							-2.79167
							-5.69648
							-4.72828
							-3.90886
							-8.37905
							-6.37845
							-5.65837
							-5.01906
							5.81159
							-5.75903
							-5.57036
							-4.08543
							-8.33101
							-8.23452
							-3.43823
							-4.29439
							-3.22042
							6.41157
							-7.7567
							-5.71938
							-5.41474
							-5.47688
							-5.83789
							-7.65651
							-5.56773
							-7.99023
							-3.21903
							4.91075
							-3.14073
							-5.21361
							-4.11933
							-3.36982
							-8.26684
							-5.65917
							-4.38663
							-3.51399
							-7.3229
							-5.52862
							6.02079
							-6.8103
							-4.013
							-4.63891
							-5.77352
							-8.18458
							-8.00337
							-5.28124
							-5.15637
							-5.3014
							-2.94463
							4.39493
							-6.08013
							-4.99975
							-6.02939
							-4.79393
							-5.71244
							-5.2758
							-7.68032
							5.29792
							-3.33091
							-3.52277
							-5.37735
							-3.76413
							-3.03452
							-4.6847
							-3.72799
							-4.09446
							-8.34933
							-3.42129
							-8.01778
							-3.12471
							-4.22585
							-4.97946
							-6.39776
							-8.26849
							-8.29114
							-6.22539
							-5.44021
							5.73826
							-5.39289
							-7.56046
							-4.97954
							-5.19642
							-3.19306
							-5.25502
							-8.10046
							-7.9034
							-3.13693
							-7.74417
							3.90366
							-3.09668
							-5.12918
							-3.87168
							-4.95848
							-3.87325
							-5.27872
							4.78068
							-7.29894
							-4.2527
							-7.59656
							-8.3638
							-5.23593
							-4.83397
							-6.70957
							-5.93131
							-5.82299
							-5.07583
							-4.50654
							-8.1863
							-3.01682
							-4.27676
							3.54342
							-4.60301
							-5.41787
							-4.20668
							-8.4124
							-3.43592
							-4.03484
							-6.08908
							4.34734
							-8.34274
							-7.85843
							-3.92153
							-3.05813
							-7.41388
							-3.19065
							-3.68398
							-5.03654
							-5.70476
							-3.36565
							-4.81104
							-5.21583
							-8.01767
							-6.28228
							-5.02755
							-5.58548
							-7.19233
							-4.06576
							-4.25279
							-5.85823
							-8.40982
							3.30542
							-4.3081
							-3.98445
							-4.56982
							-5.04799
							-8.34737
							-4.66979
							-3.24783
							-5.25111
							-6.301
							4.1029
							-4.67988
							-3.11564
							-7.83674
							-6.87364
							-4.23883
							-5.61696
							-3.2307
							4.65374
							-4.54385
							-3.96318
							-5.38861
							-3.46316
							-3.20016
							-4.38997
							-3.8654
							-4.8233
							-8.04361
							-7.5716
							-7.6942
							-4.81592
							-7.50375
							-8.60815
							-3.93942
							-8.30391
							-3.7129
							-4.37315
							-4.00715
							3.75502
							3.99638
							-3.85503
							-5.15245
							4.39416
							-3.74073
							-3.18959
							-4.86083
							-5.58267
							-5.91567
							-3.84206
							-8.49715
							-3.5138
							-4.76887
							-3.27666
							-4.66619
							-8.56525
							-4.12285
							-4.39747
							-4.59332
							-4.2647
							-8.65866
							-4.3249
							-4.90136
							-6.71038
							-3.24185
							-5.52201
							-8.39614
							-6.1544
							-4.75275
							-3.72652
							-6.09493
							-5.48398
							-3.49747
							-4.91453
							-4.21332
							-4.50827
							-8.21547
							-4.39616
							-4.22767
							-3.47506
							-8.81366
							-4.14086
							-5.37515
							-4.2027
							-7.63426
							-3.81662
							-4.1468
							-4.74435
							-7.42005
							-4.94636
							-5.5473
							-4.02467
							4.06748
							-4.41753
							4.30248
							-4.19424
							-4.21637
							3.80779
							-8.73105
							-3.33958
							-5.18199
							-8.97176
							-8.8621
							-3.82448
							-4.40466
							-4.55226
							-8.48722
							3.54012
							-4.61629
							-4.68119
							-8.76539
							-4.0127
							-8.95873
							-5.8032
							-3.57775
							-3.12225
							-3.21836
							-4.02001
							-6.22159
							-6.62268
							-4.18143
							-4.53634
							-4.31288
							-8.58189
							-4.29269
							-4.94034
							-3.34997
							-3.54368
							-9.10574
							-5.3972
							-3.83966
							3.84534
							4.26746
							-8.20314
							-4.66661
							-4.75979
							-5.46346
							-4.38301
							-7.97264
							-4.02861
							-7.78244
							-4.02206
							-4.61831
							-7.3064
							-4.52267
							-9.02137
							-5.09479
							4.32295
							-4.4111
							-4.32166
							-3.57916
							-9.21885
							-5.36955
							-4.32524
							-3.42527
							-5.9221
							-3.86643
							-9.14768
							-5.9504
							-3.05017
							-4.04729
							-4.97333
							-4.20466
							-4.53485
							-9.26087
							-4.6797
							-3.26472
							4.10445
							3.60367
							-5.63547
							-3.02298
							-8.92836
							-3.1875
							-4.52873
							-4.36207
							-4.03448
							-4.21491
							-5.19959
							-3.86322
							-3.40706
							-3.70014
							-3.68987
							4.18265
							-4.5843
							3.80313
							-7.17895
							-4.28318
							-3.83158
							-3.94478
							-4.45151
							-8.29798
							-3.9408
							-9.39919
							-3.66631
							-5.37086
							-5.74365
							-8.26743
							-4.04113
							-8.84416
							-4.36914
							-9.29172
							-4.53413
							-9.57857
							-9.47264
							-4.18749
							-4.14037
							-4.11851
							-5.78176
							-3.00667
							-5.2688
							-8.83949
							-3.26367
							-3.67158
							-2.86127
							-4.76846
							-2.94202
							-3.47847
							-4.46835
							-3.84864
							-4.35491
							-4.90057
							-3.73483
							3.58178
							-5.12501
							-3.21829
							-3.89599
							3.72562
							-7.9107
							3.80467
							-3.99536
							-3.94499
							-3.66775
							-3.97594
							-3.085
							-3.84446
							-4.30765
							-4.99231
							-3.55994
							7.38621
							-3.16342
							-4.27707
							-3.7242
							-9.64828
							-4.51819
							-3.44264
							-4.43594
							-4.57119
							-8.6689
							-2.77691
							-9.86722
							-4.07166
							3.16652
							-8.67831
							-5.38851
							-4.84819
							-4.25436
							-2.68321
							3.44257
							-3.20992
							-3.84359
							-4.54571
							-2.8646
							-3.60259
							-9.78
							-3.68469
							-3.04743
							-6.0696
							-4.45527
							-3.80346
							-3.73572
							-2.88952
							-9.57166
							-9.39726
							3.36998
							-3.11817
							-3.44473
							-9.92511
							10.0578
							-3.83878
							-8.17638
							-5.37852
							-2.57479
							-4.418
							-3.43402
							-3.53446
							-2.41452
							3.01069
							-4.92646
							-2.28783
							-2.45887
							3.21725
							-3.32192
							8.91027
							-9.81086
							-4.11276
							-3.86422
							-4.10156
							-3.03375
							-3.2499
							-2.94331
							-4.22501
							-5.0397
							-4.4658
							-10.3111
							-4.09738
							-5.09786
							-3.27833
							-3.59571
							-3.61841
							-3.2154
							-3.74504
							-3.90219
							-4.33866
							-4.26997
							-2.55043
							-3.37685
							-2.96303
							10.265
							-10.1477
							-3.75851
							-4.39942
							2.28575
							-2.28236
							-5.36655
							-9.04965
							-2.41625
							-3.97687
							-10.0265
							-3.69462
							-2.99809
							-10.005
							-3.18494
							-2.83918
							6.63652
							-7.23508
							10.5542
							2.91601
							-3.12262
							-3.58696
							-2.66903
							-2.14382
							-9.52754
							-4.5424
							-3.19923
							-2.9038
							-3.31626
							-3.1476
							-3.11582
							-3.75521
							-4.1934
							-2.18479
							-10.4099
							-2.48531
							-5.06835
							-2.02117
							10.6611
							-10.3386
							-2.90312
							-4.34268
							-2.27511
							11.4967
							-4.45328
							10.6308
							-2.91692
							-2.26898
							-1.90891
							-2.70892
							-2.46795
							-4.22984
							-4.2087
							-2.55085
							-5.10502
							-3.58933
							-4.06855
							-10.2819
							-2.02825
							-9.92045
							-2.53929
							-3.83337
							-4.63195
							-4.08005
							-2.17826
							-4.05807
							-2.89038
							-1.80431
							-10.6418
							-5.38253
							-4.48876
							-2.4106
							-2.73065
							-2.74583
							-9.37894
							-4.24678
							-7.32518
							-2.40192
							-2.60141
							-11.5703
							10.6065
							-2.92503
							6.81112
							-3.16029
							-3.53862
							-4.69612
							-10.3332
							-4.56784
							-2.50188
							-3.69225
							-1.60584
							-2.48513
							-10.849
							-2.69399
							-10.4369
							-4.42517
							-2.72914
							-3.94871
							-2.45687
							-2.2308
							-2.33131
							-1.8144
							-4.06532
							-3.41875
							-10.5378
							-2.43411
							-2.33299
							11.1747
							-4.3439
							-4.20074
							-4.85698
							-3.89588
							-4.59149
							12.045
							-4.302
							-4.01108
							-2.12122
							11.0962
							-6.63534
							-3.64231
							-1.4444
							-5.95499
							-1.60985
							-10.8101
							-2.21422
							-2.77926
							-3.16354
							-3.84435
							-2.21993
							-3.65176
							-2.28441
							-2.43986
							-2.84884
							-5.2544
							-7.08637
							-2.90406
							-4.09403
							-3.64539
							10.8298
							-11.8111
							-6.69262
							-13.1466
							-3.4966
							-10.4259
							-3.77772
							-4.46545
							-9.55514
							11.1669
							-2.11708
							-3.61641
							-1.76874
							-2.23437
							-2.66941
							-3.80342
							-2.46045
							-10.7025
							-4.90719
							-5.74505
							-2.4539
							-1.95635
							-4.60371
							-4.02869
							-4.47475
							-4.18291
							-10.9849
							-11.6744
							-4.16835
							-1.42148
							-4.64847
							7.17431
							11.5416
							-4.93001
							-4.02394
							-3.58582
							-5.91996
							-3.22925
							-4.63575
							-1.68847
							-3.14277
							11.3303
							-4.33296
							-2.59573
							-3.92996
							-4.08114
							-2.07967
							-4.69341
							-2.41373
							-10.8852
							-5.28378
							-3.08641
							-3.5991
							-3.57299
							-2.3605
							-11.978
							-5.73073
							-4.06895
							-2.87604
							-2.0273
							-4.9236
							7.05926
							-4.36871
							-4.65957
							-1.58448
							11.5561
							-2.26497
							-7.11399
							-4.99825
							-3.97268
							-10.2428
							-1.85066
							-3.83479
							-2.95882
							-11.122
							-16.7676
							-1.54626
							11.2911
							12.5368
							-1.8194
							-4.58219
							-9.59292
							-3.89568
							-4.09464
							-4.22679
							11.3578
							-2.17927
							-11.0137
							-6.74118
							-4.00836
							-4.61598
							-3.7845
							-10.5602
							-10.0682
							-4.63163
							-4.47174
							11.6386
							-12.7046
							-6.28031
							-4.39192
							-4.52426
							-2.36633
							-5.64238
							-4.40604
							-2.69738
							-3.75509
							-1.62115
							-11.5151
							-4.51339
							-2.86956
							-2.68875
							-4.14847
							-5.28887
							-2.08543
							-3.66468
							7.00821
							11.5377
							-10.4152
							-3.25534
							-4.00616
							-4.88225
							-4.5124
							-5.92855
							-5.7561
							-5.36696
							-3.43838
							-2.48014
							-4.36413
							11.7059
							-2.74438
							-5.19894
							-11.1045
							-1.91737
							-6.61223
							-6.05607
							-6.35917
							-5.69688
							-5.6119
							-6.59066
							-6.6065
							-4.76125
							-4.72324
							-6.3184
							-6.1045
							-5.80339
							-5.43838
							-3.93733
							-5.12434
							-3.74617
							-4.57329
							-4.63411
							-4.46588
							-4.62928
							-4.61784
							-4.73672
							-4.30658
							-4.54811
							-4.52108
							-4.20495
							-4.43417
							-4.39261
							-4.27536
							-4.06002
							-3.2777
							-4.21688
							-4.28239
							-4.04346
							-4.13132
							-4.05809
							-11.3687
							-6.83726
							-11.5839
							-4.0141
							-3.03216
							-3.91287
							-3.80974
							-4.17069
							-4.20552
							-6.569
							-5.43416
							-3.72666
							-7.19924
							-3.63713
							-3.33028
							-2.86831
							-3.40901
							-4.41638
							-3.62035
							-4.45581
							-3.7102
							-3.92647
							-3.37615
							-3.79643
							-4.60705
							-3.0797
							-2.53469
							-7.50955
							-4.7113
							-2.78163
							-4.81532
							-2.35687
							8.56517
							-2.49574
							-2.1724
							-4.97342
							-2.14448
							-2.2874
							-2.16335
							-1.98232
							-1.8746
							-1.79779
							-1.77297
							-1.73157
							-1.71402
							-5.23843
							5.94283
							-5.31969
							-6.6528
							-6.33832
							-5.42226
							-7.96153
							-13.3137
							8.27438
							-7.86176
							8.91376
							-14.938
							8.83426
							9.46484
							-13.4527
							-12.4462
							-11.2983
							11.2311
							11.396
							11.4868
							11.6703
							11.6862
							11.6321
							11.5486
							11.3669
							-11.2073
							-10.98
							-10.6832
							-10.4875
							-10.0935
							-9.85745
							-9.46267
							-6.55439
							-2.01532
							-11.0684
							-5.89867
							-5.90337
							11.7454
							-4.36718
							-2.57462
							-4.38584
							-6.45906
							-6.66831
							-6.9577
							-4.46613
							-4.82553
							-4.14868
							-3.32867
							-10.3414
							9.29735
							6.627
							-4.45411
							-2.2652
							-5.2442
							-4.34474
							-3.54284
							-3.44896
							-5.65479
							-11.9991
							-1.66437
							-3.77746
							-2.84241
							-4.41708
							-5.84846
							-2.7729
							-4.51341
							-7.15948
							-7.55059
							-14.0352
							11.7785
							-4.61524
							-4.59552
							-9.91652
							-10.6861
							-4.92562
							-4.57322
							-4.04798
							-6.87872
							-11.5004
							-2.36119
							11.4377
							-4.22598
							-4.18798
							-4.36558
							-9.25315
							-4.52804
							-2.069
							9.0348
							11.6071
							-1.85477
							-6.31897
							-11.8825
							-4.06022
							-4.29458
							-1.99439
							-10.083
							-4.27223
							-7.1428
							-7.39892
							-2.59985
							11.8215
							-1.81875
							-6.70295
							-4.35059
							9.20464
							7.00837
							-2.44915
							-3.13324
							-4.45749
							-6.52315
							-12.2579
							-7.93746
							-5.31879
							-3.65495
							-10.7519
							-5.27011
							-10.7828
							-3.26411
							-6.92669
							-3.47766
							-4.04869
							-4.16002
							-4.01859
							-4.29487
							11.5863
							-5.10924
							-2.19517
							-4.50712
							-3.39903
							-6.38306
							-5.92784
							-8.93674
							-5.00466
							11.7934
							8.46716
							-4.50282
							-1.99523
							-4.19404
							-11.5196
							-12.0534
							-4.60934
							-4.39887
							-4.14108
							-4.75081
							-2.48566
							-3.70472
							-6.04199
							-11.7585
							-11.7024
							-2.89953
							-4.53474
							-4.63113
							-3.05362
							-2.02924
							-5.31343
							-2.60346
							11.719
							-9.14317
							-4.37393
							-3.78264
							-10.2809
							-6.81853
							-13.195
							-8.08127
							-12.4084
							11.5875
							-7.34598
							-4.00682
							-5.04573
							-7.40109
							-5.26773
							-5.60832
							-9.69193
							-3.44778
[truncated: 1,603 more rows]

## Sheet: Blad6
	mean	std	95low	95up	surface		face	forehead	nose	cheeks	upper lip	chin
face	-5.95332	2.98234	-11.146	-2.23357	11355		-6.46038	-5.07956	-5.45549	-5.89533	-6.2866	-7.60551
forehead	-3.73426	1.0962	-5.74178	-2.37924	2673		-6.35882	-4.92682	-5.06816	-5.67519	-6.29968	-7.58979
nose	-5.12117	3.16877	-8.46502	4.81156	769		-6.25476	-4.90676	4.7535	-6.05905	-6.37114	-7.65543
cheeks	-7.41737	2.67743	-12.0767	-3.03853	2805		-6.72217	-4.82927	-5.87169	-5.4364	-6.2265	-7.62551
upper lip	-7.15564	2.67988	-10.952	-5.40388	489		-5.9492	-4.72213	4.7221	-6.12865	-6.30601	-7.60733
chin	-8.2887	0.545373	-9.1496	-7.46306	444		-6.21147	-4.70232	-5.61668	-5.85741	-5.98027	-7.58675
							-5.98973	-4.54866	5.43117	-6.12789	-6.01374	-7.60513
							-6.01488	-4.6536	4.60257	-5.68405	-6.18143	-7.53321
							-6.85268	-4.39501	-6.07594	-5.50088	-6.03559	-7.58739
							-6.15536	-4.46641	5.45018	-5.20018	-6.0431	-7.62937
							-5.70802	-4.53594	-5.88098	-5.95803	-5.93227	-7.46778
							-6.18139	-4.22769	-4.53967	-5.84754	-5.65336	-7.54242
							-5.62447	-4.47921	4.95055	-6.08798	-5.76854	-7.715
							-5.70905	-4.36948	-6.11373	-5.70337	-5.80983	-7.37338
							-6.35274	-4.47874	5.9193	-5.9645	-5.92997	-7.7358
							-6.99101	-4.10058	-4.39519	-5.84395	-5.97693	-7.62402
							-6.60991	-4.23248	-6.93988	-5.52657	-5.69886	-7.55074
							-5.86676	-4.1617	4.79762	-5.27257	-5.74322	-7.29343
							-5.87183	-4.31622	-6.11513	-5.72825	-5.69568	-7.71608
							-5.60595	-3.98649	-7.21253	-6.07298	-5.95801	-7.94163
							-5.63834	-4.20189	-6.07683	-5.10552	-5.70103	-7.95592
							-5.95379	-4.31624	5.43774	-5.86939	-5.45549	-7.87595
							-6.63443	-4.16081	5.73954	-4.98218	-5.55901	-7.65291
							-6.33742	-4.01185	-4.17776	-5.96708	-5.75685	-7.25754
							-7.07339	-4.26556	-4.60311	-5.7852	-5.70838	-8.11207
							-5.28691	-4.10351	-5.72542	-5.56177	-5.6649	-8.01745
							-5.32399	-3.90295	4.93701	-5.31096	-5.57164	-8.21735
							-6.1041	-4.05662	-5.61259	-5.85289	-5.87169	-7.30084
							-5.35893	-4.15464	-8.65839	-5.98558	-5.53716	-7.52108
							-5.65968	-4.11105	5.55272	-5.41951	-5.58231	-7.84134
							-6.33318	-4.06643	-4.01587	-5.10585	-6.07594	-8.56192
							-5.63325	-4.00444	-6.99886	-5.87239	-5.65913	-8.2425
							-5.89533	-4.03573	-5.65857	-5.77325	-5.85101	-7.75731
							-6.56504	-3.87418	5.13961	-5.68521	-5.46261	-8.4555
							-5.67519	-3.79182	-4.24065	-5.8144	-5.75192	-8.53739
							-5.31803	-3.87312	-4.84015	-5.89661	-5.40196	-7.16672
							-6.05905	-3.85536	-7.56238	-4.95411	-6.11373	-8.14353
							-6.87945	-3.91897	-3.97215	-5.88185	-5.67762	-8.3899
							-5.10975	-3.93389	-5.19376	-5.83578	-5.30632	-7.91394
							-5.2862	-4.01572	-4.59385	-5.38981	-6.12235	-8.7896
							-5.00594	-3.94299	-5.37057	-5.84762	-5.99536	-8.92516
							-6.28534	-3.83486	-9.28015	-5.7832	-5.72542	-8.55603
							-5.4364	-3.95457	-5.60114	-4.76409	-5.41748	-8.78049
							-6.12865	-3.69525	-5.68109	-5.12381	-5.80692	-7.62634
							-5.07207	-4.00665	-4.10836	-5.52668	-5.16803	-7.1842
							-6.52035	-3.85174	-3.93423	-5.85811	-6.44425	-8.08846
							-5.04038	-3.57711	-4.38151	-5.66234	-5.45956	-8.28973
							-5.85741	-3.55579	-5.1466	-5.20495	-6.37255	-8.59992
							-4.88643	-3.75322	-4.81297	-5.83828	-5.19376	-7.58258
							-6.28713	-4.00342	-3.93774	-5.82998	-5.88046	-8.88322
							-5.4599	-3.90325	-5.57987	-5.83125	-5.40964	-9.06929
							-6.55957	-3.53702	-3.97646	-5.79513	-6.94358	-7.9021
							-6.12789	-3.79973	-5.43331	-5.8578	-5.32776	-7.34506
							-5.68405	-3.68562	-6.18531	-4.73168	-6.20204	-8.19806
							-6.3784	-3.73549	-5.32776	-5.25774	-6.79328	-8.31063
							-6.67804	-3.48516	-6.59122	-4.80019	-7.01934	-8.56454
							-5.50088	-3.42035	-4.59847	-5.70027	-6.17687	-8.09015
							-5.20018	-4.00487	-6.75161	-5.36054	-7.81897	-9.07634
							-4.91011	-3.508	-4.10701	-5.83375	-5.92962	-7.92559
							-5.07441	-3.89682	-5.67697	-5.58163	-7.39641	-9.24572
							-5.95803	-3.98607	-3.95968	-5.85523	-6.86127	-8.32928
							-5.84754	-4.0484	-5.99641	-5.88601	-7.05428	-7.6899
							-6.43072	-3.27658	-4.01486	-5.89649	9.59784	-9.13172
							-4.88899	-3.26151	-5.14544	-5.93671	9.11979	-8.22981
							-6.08798	-3.80247	-3.97219	-5.85747	-12.9046	-8.92061
							-6.18701	-3.72229	-3.98539	-5.06424	-7.95164	-8.27398
							-5.09709	-3.25449	-5.57698	-4.53991	-7.79799	-8.31001
							-4.70975	-3.41793	-4.36665	-5.8841	-6.14972	-7.91955
							-5.70337	-3.98533	-3.97073	-5.97001	-7.54607	-8.14977
							-4.92961	-3.52409	-5.74819	-5.79915	-7.3099	-8.217
							-4.77414	-3.78715	-4.90213	-4.56952	-6.81883	-8.43107
							-5.9645	-3.23334	-5.92962	-6.01896	-7.10953	-8.34807
							-5.84395	-3.05814	-4.11154	-4.83457	-7.18778	-8.2683
							-5.52657	-4.00999	-6.04061	-5.93513	-8.13865	-8.16965
							-5.27257	-3.22059	-6.51113	-5.90837	-7.74508	-8.18667
							-4.673	-4.07823	-5.89717	-5.66061	-9.67752	-8.24974
							-5.36505	-3.27624	-6.67299	-4.6386	-6.21678	-8.34055
							-6.25076	-3.81989	-3.98318	-5.92325	-10.7547	-8.59646
							-5.72825	-3.04276	-6.46803	-5.97487	-8.27696	-8.76106
							-6.49097	-3.87207	-6.73745	-5.11943	-10.9237	-9.08215
							-6.07298	-3.46248	-6.12556	-5.91465	-10.1914	-9.20474
							-5.10552	-4.02925	-6.15071	-5.29316	-8.61673	-9.29792
							-5.86939	-2.87804	-6.94883	-6.12239	-6.23861	-8.29558
							-6.10887	-3.00185	-7.02303	-5.87689	-11.5255	-8.50935
							-4.98218	-3.2051	-5.87488	-5.97735	-7.60919	-8.85597
							-5.06024	-4.04994	-5.87337	-6.00457	-10.0113	-8.48483
							-4.79517	-3.61339	-7.05159	-4.88812	-7.106	-9.14793
							-4.62183	-4.09841	-7.05715	-6.07825	-11.2069	-8.06828
							-5.96708	-3.9504	-7.01982	-6.13647	-8.80335	-8.22581
							-6.28845	-3.02814	-6.91284	-4.48941	-12.9766	-9.31779
							-5.7852	-2.928	-5.50744	-6.04651	-9.19475	-8.45646
							-6.1102	-3.87776	-6.80271	-6.17783	-10.9614	-9.09706
							-5.56177	-2.78944	-5.38342	-5.93056	-10.2297	-8.6047
							-4.8536	-3.71218	-6.67036	-5.60198	-8.81066	-8.62039
							-5.31096	-4.0029	-4.94801	-4.68534	-10.6152	-8.43821
							-5.85289	-3.30955	-6.37619	-4.5196	-10.3742	-8.56884
							-5.98558	-2.77194	-4.75301	-5.91739	-10.505	-8.20221
							-5.41951	-3.82137	-6.21298	-6.2905	-8.66054	-8.69696
							-4.66373	-2.95723	-6.14972	-4.40308	-11.0691	-9.35147
							-5.26844	-2.88228	-4.58662	-6.00827	-8.28243	-8.97784
							-4.52102	-3.93539	-4.35351	-4.85697	-8.29726	-8.59166
							-4.59586	-2.77283	-4.25421	-4.32919	-9.74547	-8.64121
							-5.10585	-4.1512	-4.15204	-6.09686	-8.92894	-8.52565
							-5.87239	-3.95171	-4.14056	-5.97625	-7.64888	-8.68658
							-5.77325	-4.02443	-3.96725	-5.00279	-11.0642	-8.41589
							-5.68521	-3.1074	-3.99939	-5.23922	-7.50148	-8.65551
							-5.8144	-2.75893	-3.95857	-5.79804	-7.4699	-9.24267
							-6.06339	-3.38715	-3.90103	-6.17171	-10.218	-8.65131
							-5.89661	-4.08484	-3.90543	-6.16182	-8.37239	-9.18127
							-6.37717	-3.69351	-3.92218	-6.21817	-8.03951	-8.98392
							-4.74074	-2.90062	-3.98012	-6.40002	-7.7817	-8.75195
							-4.95411	-4.08082	-7.0847	-6.37333	-7.54105	-8.71284
							-4.63641	-2.7516	-6.7091	-5.94865	-8.23458	-8.85012
							-5.88185	-2.8515	-7.53363	-5.34937	-6.83474	-8.54234
							-5.00795	-2.69462	-6.32588	-6.04904	-8.59199	-9.01698
							-5.83578	-3.38629	-4.21288	-4.3445	-7.63249	-8.88151
							-5.38981	-3.78169	-6.21678	-6.22578	-8.259	-8.78829
							-5.84762	-4.03072	-5.02095	-6.40354	-7.51708	-8.88342
							-5.7832	-4.16758	-6.27735	-6.20907	-8.06765	-8.86017
							-4.76409	-2.84869	-3.99703	-6.56456	-7.41786	-8.93129
							-5.12381	-3.01564	-4.47333	-6.29868	-7.93415	-8.7186
							-5.52668	-3.87327	-5.95908	-4.25393	-8.4907	-8.61489
							-6.17831	-3.49257	-4.04143	-6.51992	-8.08171	-8.84057
							-4.64713	-2.73921	-4.05539	-4.50217	-8.26361	-8.94814
							-5.20464	-4.13268	-5.48245	-6.00884	-8.4668	-8.88496
							-5.98261	-3.07991	-4.10796	-4.19362	-8.53344	-8.45979
							-4.40507	-2.7215	-7.76929	-4.88555	-8.35479	-8.63325
							-5.85811	-4.14298	-4.16238	-4.12508	-7.87182	-8.963
							-5.66234	-3.90569	-7.30761	-6.04274	-7.66176	-8.81252
							-5.20495	-4.09338	-4.34468	-6.11367	-8.49748	-8.6584
							-5.83828	-3.205	-6.89361	-6.25344	-7.83402	-8.77249
							-4.43384	-2.64103	-4.86783	-5.05621	-8.61445	-8.19731
							-5.82998	-4.12466	-7.78179	-6.52328	-8.23292	-8.19889
							-5.83125	-4.04907	-6.23861	-6.35073	-8.57673	-8.45533
							-4.46456	-2.8002	-5.79853	-4.09029	-8.51449	-8.35921
							-5.79513	-4.16279	-6.30937	-5.30683		-7.89701
							-4.67438	-3.53651	-4.11591	-6.70786		-8.36551
							-6.27878	-2.71922	-6.95697	-6.61579		-8.03148
							-5.8578	-2.76452	-4.09472	-6.67339		-7.76882
							-4.73168	-2.8904	-5.47677	-6.10572		-8.07305
							-4.35767	-3.20565	-6.12114	-6.57168		-7.94987
							-5.25774	-4.08893	-4.90499	-5.79286		-7.75074
							-6.06022	-2.73785	-4.10734	-6.24798		-8.01808
							-4.43317	-3.77279	-4.57754	-6.34798		-7.7314
							-5.90585	-2.62813	-7.79776	-4.14978		-7.69179
							-4.80019	-4.16288	-8.443	-4.02106		-7.64767
							-5.70027	-4.16055	-6.68257	-6.14929		-7.60094
							-5.36054	-3.26263	-7.13675	-6.44111		-7.59567
							-5.83375	-2.5899	-5.36862	-6.80188		-7.61512
							-5.58163	-4.10807	-7.106	-6.84373
							-5.07956	-2.58301	-4.36128	-6.8713
							-4.9031	-2.64194	-8.52291	-4.72728
							-5.85523	-3.48589	-5.93062	-6.697
							-5.88601	-4.1401	-4.94434	-4.34085
							-5.89649	-3.92421	-6.68085	-3.87734
							-5.93671	-2.72283	-8.45858	-4.99019
							-5.85747	-2.75369	-6.51875	-3.89286
							-4.28736	-2.55333	-4.73738	-6.90441
							-4.30543	-3.6807	-7.7491	-6.0062
							-4.42977	-4.23437	-8.01994	-6.41415
							-6.00049	-2.9378	-8.7239	-3.75896
							-5.06424	-3.18095	-6.34637	-6.29295
							-4.53991	-3.94931	-8.81066	-6.25405
							-5.8841	-2.54673	-5.79918	-6.5309
							-5.97001	-2.584	-5.12919	-4.02428
							-5.93075	-2.45721	-8.13221	-5.33912
							-4.64289	-3.30261	-7.28862	-6.53531
							-5.79915	-4.17957	-8.45451	-3.85094
							-4.92682	-3.76598	-8.03462	-7.01739
							-4.90676	-4.02938	-8.44469	-7.02434
							-4.56952	-4.11369	-6.32432	-6.76352
							-6.01896	-2.40787	-9.12408	-6.95396
							-4.83457	-4.28958	-5.68157	-3.68039
							-5.93513	-3.47761	-7.83096	-4.47029
							-5.90837	-2.456	-11.0691	-5.60384
							-5.66061	-2.72241	-6.48179	-6.40094
							-6.2685	-2.9736	-6.03259	-6.09073
							-4.30846	-2.52872	-7.95061	-6.43383
							-4.6386	-3.90403	-6.76848	-3.48406
							-5.92325	-2.50074	-11.0642	-7.11043
							-5.97487	-4.02731	-6.10429	-6.58999
							-4.39972	-4.12947	-6.73316	-3.47939
							-5.11943	-3.68315	-7.37464	-7.05963
							-5.91465	-2.44406	-5.94786	-4.87273
							-6.1185	-2.44969	-10.218	-3.61379
							-4.24568	-4.335	-5.90187	-3.96152
							-4.82927	-3.07968	-6.1717	-7.08222
							-5.29316	-2.33382	-6.83474	-3.69114
							-6.12239	-2.36094		-3.44616
							-4.72213	-2.74001		-3.56236
							-5.87689	-4.15935		-5.16526
							-5.97735	-3.84991		-5.65685
							-4.70232	-2.50978		-6.81802
							-6.00457	-3.68506		-7.21122
							-4.88812	-3.34845		-6.81091
							-5.94704	-2.40505		-6.99181
							-6.07825	-3.95911		-6.62926
							-6.13647	-2.31722		-7.22805
							-4.48941	-3.0748		-6.44041
							-6.04651	-3.44529		-3.34304
							-6.17783	-2.33807		-4.6054
							-5.93056	-4.38288		-7.28545
							-4.54866	-2.70746		-5.8841
							-4.1571	-2.31288		-7.18149
							-5.60198	-4.11822		-7.10343
							-6.00557	-2.46955		-3.90733
							-4.68534	-2.50275		-7.04492
							-4.5196	-2.21797		-3.31043
							-5.91739	-2.37138		-5.31066
							-6.05715	-3.66267		-6.85177
							-6.2905	-3.95422		-3.06814
							-4.40308	-2.7158		-3.49129
							-4.6536	-2.19935		-7.3712
							-4.39501	-3.13097		-6.40153
							-6.24218	-4.4267		-7.01662
							-6.00827	-3.41312		-3.01124
							-4.85697	-2.11467		-3.27543
							-4.46641	-2.31159		-6.06292
							-4.32919	-4.0792		-3.08819
							-4.53594	-2.44739		-4.6298
							-4.24058	-4.24608		-7.33301
							-4.2205	-2.41478		-7.43774
							-6.09686	-2.90715		-7.00272
							-5.97625	-3.76038		-6.79537
							-4.18617	-3.15301		-7.38528
							-5.00279	-2.69933		-4.16444
							-5.23922	-2.06274		-7.29143
							-5.79804	-2.13724		-5.74978
							-6.17171	-2.25027		-7.06508
							-4.22769	-2.95783		-7.22614
							-6.16182	-2.23412		-3.40159
							-4.11677	-3.51453		-4.96682
							-6.21817	-2.62327		-7.23732
							-6.40002	-4.45956		-6.3171
							-6.37333	-2.14727		-3.00418
							-5.95828	-4.11521		-3.21914
							-4.17424	-3.87364		-7.5781
							-4.47921	-2.44121		-2.94097
							-6.09989	-2.76298		-5.38341
							-4.36948	-2.45362		-3.49844
							-5.94865	-2.52125		-2.7116
							-4.47874	-3.00667		-7.48078
							-4.10058	-3.15297		-7.01823
							-6.02941	-2.26239		-7.24815
							-4.23248	-3.63276		-5.97128
							-4.09726	-3.32167		-3.93174
							-5.34937	-4.47273		-4.53753
							-6.04904	-2.31119		-7.40631
							-4.3445	-3.94085		-6.75643
							-6.22578	-2.55867		-7.21565
							-6.40354	-2.72799		-3.01784
							-6.20907	-2.27193		-7.62458
							-6.56456	-2.66815		-7.61592
							-6.29868	-2.51376		-2.64662
							-4.25393	-2.79375		-7.40954
							-4.1617	-2.43901		-7.68914
							-6.51992	-4.07304		-7.36638
							-4.50217	-3.13991		-2.99149
							-3.9999	-3.38001		-2.6688
							-6.00884	-2.74051		-2.49357
							-4.31622	-2.93505		-5.79039
							-6.26268	-2.36149		-6.56993
							-3.98649	-2.57658		-7.25211
							-6.00492	-3.76204		-5.19108
							-4.20189	-4.50353		-7.55162
							-4.19362	-2.39106		-2.45851
							-4.88555	-2.79177		-7.05934
							-4.31624	-2.39992		-3.96765
							-4.08977	-2.39158		-7.47907
							-4.12508	-4.18317		-7.72385
							-6.04274	-2.29267		-7.53988
							-6.11367	-2.38894		-7.64655
							-6.25344	-2.52093		-2.91539
							-5.05621	-3.40075		-3.18871
							-6.52328	-2.6298		-2.77542
							-4.16081	-3.95621		-6.42768
							-4.01185	-3.09195		-4.80152
							-6.35073	-4.56371		-5.72575
							-4.07082	-3.0168		-2.98179
							-4.26556	-3.74914		-6.9507
							-4.09029	-2.72605		-2.33555
							-3.94414	-2.47667		-6.08017
							-5.30683	-2.58955		-7.68136
							-6.11676	-4.38386		-7.61478
							-6.70786	-3.08739		-2.37866
							-6.61579	-2.4736		-7.70548
							-4.10351	-2.66791		-7.69404
							-3.90295	-2.38009		-7.46714
							-6.67339	-4.13327		-7.60893
							-4.00989	-2.61284		-5.37608
							-6.10572	-2.41228		-2.41513
							-6.05012	-3.49944		-2.22421
							-6.57168	-3.29707		-2.88796
							-5.79286	-2.59151		-7.73372
							-6.24798	-2.85967		-7.27984
							-4.05662	-4.66181		-4.86626
							-6.34798	-2.78865		-3.39616
							-4.15464	-3.00001		-4.37732
							-4.14978	-3.83594		-3.1251
							-4.11105	-3.31746		-2.61957
							-6.06465	-2.48345		-7.77415
							-3.83122	-4.37762		-6.39576
							-4.02106	-2.55946		-4.01016
							-6.14929	-2.65997		-6.93873
							-4.06643	-2.91881		-2.20735
							-4.00444	-2.5625		-5.89757
							-6.44111	-2.55328		-7.85307
							-3.93514	-2.83328		-7.65177
							-6.27489	-3.13618		-7.51982
							-4.03573	-3.62156		-7.71443
							-6.80188	-2.65723		-5.40523
							-3.87418	-4.03227		-2.18234
							-6.84373	-2.81474		-7.62458
							-6.8713	-3.44513		-3.8452
							-3.79182	-4.72572		-4.92102
							-3.87312	-2.64499		-7.35537
							-4.72728	-4.35141		-2.08057
							-6.697	-3.80693		-3.30618
							-4.34085	-3.40836		-7.60876
							-6.10673	-3.18485		-6.69476
							-3.87734	-3.37986		-2.48623
							-4.0198	-2.92963		-2.09524
							-6.15699	-2.67718		-7.88533
							-4.99019	-3.5754		-2.8586
							-3.89286	-2.78484		-7.95221
							-6.90441	-2.77709		-6.3349
							-6.0062	-3.02886		-4.52714
							-6.41415	-3.44495		-7.68219
							-3.75896	-3.24286		-7.76649
							-6.29295	-2.69508		-7.20323
							-3.96395	-3.17282		-6.01644
							-6.25405	-3.31186		-5.59597
							-3.85536	-3.72019		-2.22153
							-3.91897	-4.78844		-3.63986
							-3.93389	-4.17066		-4.07875
							-6.5309	-2.97551		-7.58825
							-4.02428	-4.45342		-7.79364
							-4.01572	-3.66934		-2.01131
							-3.85525	-3.46623		-8.04442
							-3.86124	-2.79151		-7.11916
							-5.33912	-3.19901		-2.025
							-6.53531	-3.30324		-3.31873
							-6.15038	-3.41672		-8.00836
							-3.94299	-3.51274		-6.93608
							-3.83486	-2.90858		-5.23738
							-3.85094	-3.64777		-7.72725
							-7.01739	-3.11151		-6.69482
							-3.95457	-2.94031		-6.23296
							-7.02434	-3.03119		-7.43272
							-3.69525	-3.97096		-7.80315
							-6.76352	-4.89457		-2.03136
							-4.00665	-3.73998		-2.61974
							-3.85174	-3.68562		-4.7782
							-6.95396	-3.73544		-7.79152
							-3.57711	-4.28712		-5.83431
							-6.16207	-3.35283		-8.11387
							-3.68039	-3.59624		-8.03625
							-4.47029	-3.75022		-3.67528
							-6.1977	-2.99803		-1.94041
							-3.69436	-4.61151		-6.60876
							-5.60384	-3.80009		-4.2182
							-6.32286	-3.53765		-2.18073
							-6.21363	-3.40002		-3.11612
							-3.55579	-3.79707		-7.38956
							-3.75322	-4.12621		-7.17777
							-4.00342	-3.22098		-5.79141
							-6.40094	-3.19948		-6.924
							-6.09073	-3.77882		-1.89648
							-6.43383	-3.33726		-7.83981
							-3.48406	-3.24282		-7.83431
							-3.90325	-3.0823		-8.1842
							-7.11043	-3.83971		-6.42833
							-6.58999	-3.51368		-7.94914
							-6.27229	-3.85198		-5.54412
							-3.47939	-4.9779		-2.06077
							-3.88009	-3.93427		-2.56321
							-6.29356	-3.64026		-4.95455
							-7.05963	-3.86527		-1.90293
							-4.87273	-3.27881		-3.52771
							-3.61379	-3.85823		-7.30432
							-3.53702	-3.70487		-8.2367
							-3.96152	-4.75498		-7.45185
							-3.79973	-3.85065		-4.24576
							-7.08222	-3.22604		-7.84334
							-3.68562	-3.94666		-2.99534
							-6.24902	-3.32273		-7.81632
							-3.69114	-3.84369		-6.93682
							-3.73549	-3.51339		-2.22042
							-3.44616	-3.30664		-7.71819
							-3.70335	-3.7912		-8.10861
							-3.56236	-3.58056		-7.93114
							-3.55328	-3.96198		-2.00342
							-6.28283	-3.89942		-6.07727
							-5.16526	-3.53458		-8.19481
							-5.65685	-4.46286		-6.57365
							-6.81802	-3.41279		-7.50685
							-3.48516	-5.0733		-7.48432
							-3.42035	-3.33896		-7.82978
							-4.00487	-4.20371		-2.66556
							-7.21122	-3.90858		-3.3054
							-6.2654	-3.39118		-3.93534
							-6.81091	-3.50678		-7.58102
							-3.66251	-3.96934		-8.07978
							-3.508	-4.01223		-2.36953
							-3.86213	-3.95638		-6.90432
							-3.89682	-3.99873		-5.41392
							-6.99181	-3.44216		-2.13711
							-6.62926	-3.49172		-8.15174
							-3.98607	-4.69692		-7.57067
							-6.45074	-3.76981		-7.77059
							-4.0484	-3.44786		-6.3802
							-3.27658	-3.62651		-5.96802
							-7.22805	-3.57537		-7.93915
							-6.44041	-4.00002		-4.75756
							-3.34304	-4.03022		-7.7253
							-6.38446	-3.83701		-7.75827
							-6.35497	-5.14655		-7.59702
							-3.77916	-3.76717		-2.77169
							-3.26151	-3.91183		-8.05504
							-4.6054	-3.53766		-7.80435
							-3.80247	-4.01295		-2.18773
							-7.28545	-4.03321		-7.34287
							-5.8841	-4.54758		-7.64721
							-3.72229	-3.68329		-4.36451
							-7.18149	-3.6892		-5.68859
							-3.25449	-4.24256		-3.68852
							-7.10343	-3.63354		-7.655
							-3.61898	-3.6692		-7.64485
							-3.90733	-4.88503		-6.25286
							-3.41793	-3.98506		-6.76004
							-6.3501	-3.74162		-7.91521
							-6.35743	-3.97646		-7.6895
							-7.04492	-3.80466		-7.63675
							-3.31043	-3.83189		-7.56057
							-3.98533	-3.89038		-5.06364
							-5.31066	-5.2402		-2.28751
							-3.52409	-3.97595		-2.65966
							-3.78715	-4.13135		-3.48281
							-3.23334	-4.01098		-6.52512
							-6.85177	-3.64764		-7.72372
							-3.06814	-4.02887		-7.10233
							-3.49129	-4.01738		-7.59518
							-7.3712	-3.98539		-7.49266
							-6.40153	-3.71174		-5.78676
							-3.05814	-3.77428		-6.77892
							-7.01662	-3.90667		-4.21981
							-3.01124	-4.0468		-7.54806
							-4.00999	-3.91017		-7.33659
							-3.22059	-3.86546		-7.34828
							-3.27543	-3.81754		-7.47654
							-6.76202	-4.44533		-2.34263
							-6.06292	-3.914		-7.3707
							-3.47827	-3.92309		-4.93549
							-4.07823	-4.07645		-6.3279
							-3.08819	-3.93328		-3.05922
							-4.6298	-4.19962		-7.25212
							-7.33301	-5.306		-4.23845
							-7.43774	-4.00408		-6.50574
							-7.00272	-4.02217		-7.33365
							-6.79537	-4.77931		-7.12236
							-3.27624	-3.71798		-5.92365
							-6.55315	-4.08985		-5.40329
							-7.38528	-3.74612		-6.81802
							-6.45447	-3.98318		-2.25993
							-6.72301	-3.7412		-7.14258
							-3.81989	-3.81234		-7.20677
							-3.04276	-3.7693		-3.75095
							-3.52171	-3.89833		-4.71965
							-4.16444	-3.91933		-7.02561
							-3.87207	-3.82368		-2.74347
							-7.29143	-3.95226		-5.40256
							-6.46879	-3.95287		-6.83205
							-5.74978	-3.87386		-5.85809
							-3.26026	-3.91605		-6.26566
							-6.45075	-3.87852		-6.8209
							-7.06508	-3.8395		-3.44162
							-7.22614	-3.95696		-5.08389
							-3.55166	-3.85384		-6.57414
							-3.40159	-4.00179		-5.52779
							-3.16958	-3.88662		-6.6443
							-3.46248	-4.05391		-4.1434
							-4.96682	-3.89711		-5.92437
							-4.02925	-3.90722		-6.21554
							-2.87804	-4.17637		-6.46741
							-7.23732	-4.2087		-4.80296
							-6.3171	-3.9289		-6.19485
							-3.00418	-3.9361		-5.35449
							-3.28376	-4.36048		-5.94754
							-3.54325	-4.39223		-5.5363
							-3.00185	-3.95986		-5.65339
							-3.2051	-4.5341		-8.12129
							-3.21914	-4.02712		-7.46784
							-6.72756	-4.62358		-8.31417
							-4.04994	-4.03407		-6.8494
							-7.5781	-4.72547		-8.34034
							-3.61339	-4.04117		-5.93561
							-2.94097	-4.98449		-8.36482
							-4.09841	-4.00437		-8.55789
							-6.89423	-4.00014		-8.25586
							-5.38341	-3.96725		-4.99448
							-3.49844	-5.33102		-8.7827
							-3.9504	-3.98012		-7.39608
							-2.7116	-3.82318		-8.63106
							-7.48078	-4.03362		-6.32355
							-6.55497	-3.79401		-4.15149
							-3.02814	-4.8674		-8.95145
							-7.01823	-4.09779		-8.46523
							-2.928	-3.99066		-7.76394
							-7.24815	-5.40273		-8.74019
							-3.87776	-4.29203		-6.59168
							-5.97128	-3.92328		-3.49086
							-2.78944	-4.0292		-8.89708
							-6.63359	-3.96297		-5.40059
							-3.93174	-3.96727		-4.39721
							-4.53753	-4.56061		-8.86549
							-6.5256	-3.84113		-8.81923
							-7.40631	-3.92168		-3.21086
							-6.75643	-3.87104		-8.34242
							-7.21565	-4.03139		-6.07786
							-3.71218	-3.90967		-7.06668
							-3.01784	-3.92613		-8.62694
							-3.32048	-3.79396		-8.84324
							-7.14632	-4.04143		-7.9972
							-7.62458	-4.20792		-4.73115
							-7.61592	-4.00731		-8.66523
							-6.8564	-3.80142		-3.81428
							-6.73785	-4.00829		-7.44651
							-4.0029	-4.32694		-5.42112
							-2.64662	-3.95111		-8.70934
							-7.40954	-5.42052		-3.22545
							-3.30955	-3.84923		-8.56002
							-2.77194	-4.08298		-8.59079
							-3.39676	-3.94796		-8.43854
							-6.94648	-4.11591		-8.68311
							-3.12393	-3.90725		-4.72073
							-3.82137	-3.9911		-7.72788
							-7.68914	-5.09447		-6.38031
							-3.08703	-3.85084		-8.60049
							-7.36638	-3.89095		-8.70775
							-2.99149	-4.47388		-8.04686
							-2.95723	-3.94652		-8.58469
							-2.6688	-3.97659		-7.27907
							-2.88228	-4.74485		-4.14475
							-7.09882	-4.08457		-3.54831
							-7.29705	-3.9593		-3.23638
							-2.49357	-3.81218		-5.462
							-3.93539	-3.83479		-8.5422
							-6.88547	-3.79497		-8.54233
							-5.79039	-5.41626		-8.63738
							-6.56993	-4.20369		-8.60812
							-2.77283	-3.91104		-7.45253
							-6.73972	-4.07433		-6.68779
							-7.25211	-3.9648		-8.37916
							-5.19108	-3.79722		-8.534
							-4.1512	-3.81294		-4.35984
							-6.87224	-3.76719		-6.09195
							-3.20093	-4.99137		-4.91151
							-7.55162	-3.86509		-8.53048
							-2.45851	-3.80597		-7.87385
							-3.95171	-3.97407		-3.28991
							-4.02443	-3.8195		-8.51934
							-7.05934	-4.0929		-8.58833
							-3.1074	-4.32872		-3.75709
							-3.3233	-3.79214		-8.38335
							-2.75893	-3.76856		-8.46206
							-6.65592	-3.85498		-8.50863
							-3.38715	-4.54514		-5.28976
							-3.96765	-3.81632		-8.50657
							-7.47907	-5.40482		-6.28465
							-7.72385	-3.87066		-6.77801
							-7.40578	-4.80887		-8.46181
							-2.79698	-3.97178		-8.42072
							-7.53988	-3.97429		-8.52036
							-7.64655	-4.16754		-3.33695
							-2.91539	-3.67892		-5.78775
							-3.18871	-3.69896		-7.43761
							-2.95542	-3.81587		-3.62085
							-2.77542	-3.66675		-8.45906
							-4.08484	-4.03726		-8.41169
							-3.69351	-3.71261		-4.77394
							-6.42768	-4.14043		-4.2716
							-3.17067	-3.80281		-3.886
							-4.80152	-4.05889		-8.46017
							-2.90062	-5.10986		-7.99047
							-6.89494	-4.11855		-8.2729
							-2.9453	-3.78543		-6.9674
							-5.72575	-3.70462		-8.43853
							-7.31986	-4.10273		-6.38643
							-2.98179	-3.6213		-3.35622
							-7.11875	-4.36009		-8.45622
							-6.9507	-5.35577		-8.41824
							-2.56262	-4.12258		-8.41775
							-2.33555	-3.99406		-3.75671
							-6.08017	-4.0692		-7.5368
							-4.08082	-3.77803		-8.42942
							-7.68136	-3.62721		-4.30672
							-7.61478	-3.85046		-8.48384
							-7.39356	-3.70215		-5.16215
							-2.7516	-3.76593		-8.29299
							-2.37866	-3.65235		-8.37655
							-7.70548	-4.54882		-8.09752
							-7.69404	-3.93212		-4.71973
							-3.21165	-3.58985		-3.5156
							-2.8515	-3.59525		-5.6018
							-2.69462	-4.06094		-4.24605
							-3.38629	-5.0007		-3.80736
							-3.78169	-3.67724		-6.05343
							-7.46714	-4.21913		-8.51328
							-4.03072	-3.57288		-7.13035
							-7.30528	-3.90168		-8.38154
							-6.83023	-4.69594		-8.53051
							-4.16758	-3.96477		-8.54361
							-7.13587	-3.83221		-3.82936
							-7.60893	-3.98588		-7.63216
							-2.84869	-5.27506		-6.41466
							-5.37608	-4.43259		-8.20618
							-3.01564	-3.52684		-8.32633
							-2.41513	-3.57892		-4.76038
							-7.55939	-3.47617		-4.20688
							-2.22421	-3.89704		-5.42924
							-7.05245	-3.63144		-7.33977
							-2.88796	-4.05694		-4.04715
							-7.73372	-3.51117		-5.25551
							-7.27984	-3.5421		-8.54004
							-4.86626	-3.81646		-8.42759
							-3.13593	-3.54281		-6.86296
							-3.87327	-3.5239		-8.64548
							-3.39616	-3.90984		-5.99643
							-7.45431	-4.83701		-4.75313
							-3.49257	-3.6727		-4.33995
							-4.37732	-4.59005		-8.68644
							-3.1251	-5.14517		-8.57661
							-2.73921	-4.20042		-7.34769
							-7.35953	-3.89032		-7.68218
							-2.90885	-3.42405		-8.77802
							-4.13268	-3.44288		-6.48269
							-2.61957	-3.46418		-8.15132
							-7.77415	-3.80491		-8.65076
							-6.39576	-3.69148		-5.4126
							-4.01016	-3.5184		-4.58317
							-3.07991	-3.33415		-8.48089
							-6.93873	-3.9002		-8.60622
							-2.20735	-3.43075		-4.61412
							-2.7215	-3.4171		-8.81492
							-2.42954	-3.9242		-8.87372
							-4.14298	-3.62425		-5.99842
							-2.79754	-3.87152		-5.76962
							-5.89757	-4.20476		-4.89166
							-3.90569	-4.65098		-7.18071
							-7.85307	-3.30596		-7.62955
							-7.65177	-4.96487		-8.71329
							-7.31441	-3.87955		-8.90443
							-7.56762	-3.48973		-8.93686
							-6.99556	-4.33845		-6.48054
							-4.09338	-3.40933		-7.97724
							-3.205	-3.99976		-8.92881
							-7.51982	-3.74145		-5.56027
							-7.71443	-3.40865		-8.98658
							-5.40523	-3.29418		-5.04186
							-2.64103	-3.30609		-5.34529
							-7.57586	-3.5134		-8.31116
							-2.18234	-3.39543		-9.26553
							-4.12466	-3.36785		-6.01779
							-7.49105	-4.53352		-5.17991
							-7.62458	-3.23626		-9.09122
							-7.79596	-3.76654		-7.03655
							-4.04907	-4.04751		-6.35444
							-2.8002	-3.44448		-9.29335
							-3.8452	-3.38354		-5.33973
							-4.92102	-4.7564		-7.64201
							-4.16279	-3.48034		-9.21454
							-2.56033	-3.34081		-9.38453
							-7.35537	-3.55206		-9.27682
							-2.08057	-3.70241		-9.30209
							-7.60665	-3.37925		-8.14141
							-2.888	-3.39231		-5.55401
							-3.30618	-4.20474		-8.96542
							-2.92135	-3.2673		-6.80559
							-7.60876	-3.30344		-8.61802
							-3.53651	-3.19562		-9.42292
							-7.26966	-3.74129		-5.91962
							-2.71922	-4.41075		-6.52329
							-6.69476	-3.39632		-7.2321
							-2.48623	-3.42932		-6.69192
							-2.78749	-3.31152		-7.66023
							-2.09524	-3.79963		-9.52429
							-7.88533	-3.49303		-9.65547
							-2.76452	-4.53101		-6.35351
							-2.8586	-3.32824		-5.79009
							-7.95221	-3.86377		-5.95713
							-6.3349	-3.25699		-8.21378
							-2.7977	-3.44099		-9.87275
							-2.8904	-3.22411		-9.89323
							-4.52714	-3.32619		-9.93492
							-7.68219	-3.16647		-9.88843
							-7.72346	-4.04446		-6.06224
							-3.20565	-3.51396		-10.0026
							-7.76649	-3.18565		-9.97141
							-2.31417	-3.05426		-9.03341
							-7.20323	-3.35605		-6.1882
							-7.51411	-4.25759		-9.6464
							-7.72309	-3.56206		-6.91585
							-4.08893	-3.07445		-8.80746
							-6.01644	-3.03568		-8.20606
							-2.73785	-3.17305		-9.45595
							-2.68704	-3.35241		-6.62052
							-7.72977	-3.33216		-7.30449
							-7.18674	-3.22221		-6.93056
							-3.77279	-3.73033		-10.2919
							-2.62813	-3.23598		-10.2855
							-5.59597	-3.08786		-10.3025
							-4.16288	-3.12383		-10.3566
							-2.22153	-2.59903		-7.84862
							-2.59805	-3.00137		-10.1517
							-3.63986	-3.04235		-6.57046
							-4.07875	-3.02178		-10.4675
							-7.58825	-3.52095		-8.93606
							-7.68668	-3.17379		-10.3913
							-7.97339	-3.96671		-9.99854
							-7.79364	-3.17361		-9.41172
							-7.83541	-3.26834		-6.75709
							-2.01131	-2.82505		-6.71968
							-4.16055	-3.0513		-7.47836
							-8.04442	-3.01095		-10.7707
							-7.11916	-3.08809		-10.6702
							-2.025	-3.00435		-10.896
							-3.26263	-2.89747		-7.08028
							-2.5899	-2.23275		-10.896
							-7.93267	-3.25394		-10.8836
							-4.10807	-3.42303		-7.56806
							-3.31873	-2.74806		-10.7999
							-8.00836	-3.67734		-10.5136
							-6.93608	-2.67476		-10.8734
							-2.58301	-3.02203		-8.96717
							-2.64194	-2.82326		-8.55863
							-3.48589	-2.8566		-10.0343
							-2.6691	-2.84475		-11.2629
							-5.23738	-2.75919		-10.7809
							-4.1401	-2.62893		-11.11
							-2.36613	-2.78988		-7.16426
							-2.55163	-2.81901		-8.41339
							-3.92421	-2.98565		-9.71092
							-7.72725	-2.72511		-7.59322
							-7.62217	-2.68541		-11.2073
							-6.69482	-3.27545		-8.17526
							-2.72283	-2.69795		-7.32743
							-6.23296	-3.14017		-10.6095
							-7.43272	-2.01016		-11.4589
							-7.80315	-2.48388		-9.65521
							-7.7953	-2.75861		-8.55164
							-7.8189	-3.39484		-11.2893
							-2.03136	-2.69058		-11.6899
							-2.75369	-2.62328		-10.3724
							-2.61974	-2.65922		-11.5928
							-4.7782	-2.93749		-9.23512
							-7.79152	-2.76873		-11.6013
							-2.55333	-2.5656		-11.1882
							-5.83431	-2.41404		-11.3604
							-7.45207	-2.41869		-11.636
							-7.79504	-2.38272		-11.5468
							-8.11387	-2.93285		-9.70797
							-3.6807	-1.94494		-7.68097
							-4.23437	-2.5174		-10.7908
							-2.11319	-3.1129		-8.34645
							-2.41897	-2.24323		-7.85214
							-2.9378	-2.61102		-11.9185
							-8.08911	-2.50899		-11.1129
							-8.03625	-2.47244		-11.7444
							-3.67528	-2.75303		-8.82397
							-3.18095	-2.50853		-8.09315
							-1.94041	-2.48151		-12.1088
							-3.94931	-2.59713		-10.4083
							-8.08865	-2.26539		-7.87993
							-2.54673	-2.62504		-12.0365
							-2.37184	-2.74364		-9.40846
							-2.584	-2.43723		-11.7968
							-2.45721	-2.19438		-12.016
							-6.60876	-2.02286		-10.9368
							-4.2182	-2.41709		-12.0101
							-2.18073	-2.84195		-9.98607
							-3.11612	-2.15682		-8.6106
							-7.38956	-2.31822		-11.4862
							-7.17777	-2.42814		-12.0249
							-3.30261	-2.59889		-12.4075
							-4.17957	-2.60274		-12.2537
							-7.82342	-2.49991		-11.8504
							-2.76217	-2.49608		-12.2033
							-5.79141	-2.33802		-12.3769
							-2.4333	-2.40988		-11.021
							-3.76598	-2.37671		-10.6567
							-6.924	-2.26822		-8.99751
							-1.89648	-2.30555		-8.39797
							-8.06869	-2.61649		-9.2913
							-7.82952	-2.20874		-12.1767
							-7.83981	-2.51473		-9.69576
							-7.83431	-2.44407		-8.44403
							-7.99575	-2.3343		-10.5218
							-8.1842	-2.46996		-12.4219
							-4.02938	-2.44077		-8.81347
							-4.11369	-2.40698		-12.5334
							-6.42833	-2.7209		-12.3972
							-7.82656	-2.67889		-8.70116
							-7.94914	-2.37337		-11.8246
							-2.40787	-2.48373		-11.5285
							-2.32952	-2.40784		-12.5752
							-8.24844	-2.43797		-11.2363
							-7.91085	-2.35782		-10.2603
							-5.54412	-2.8396		-9.14653
							-2.06077	-2.44788		-12.3312
							-7.6885	-2.98507		-12.5961
							-2.56321	-2.36694		-12.5098
							-4.28958	-2.36742		-12.4748
							-3.47761	-2.50215		-9.52191
							-4.95455	-2.5514		-12.1283
							-2.456	-3.15386		-11.1438
							-1.90293	-2.37015		-9.84382
							-3.52771	-2.71496		-12.6717
							-2.37751	-2.55122		-12.6213
							-2.12932	-2.32933		-11.9921
							-2.72241	-2.32891		-9.21806
							-8.22744	-2.972		-12.6508
							-7.30432	-2.42974		-11.7534
							-2.9736	-3.26164		-12.63
							-8.2367	-2.39664		-8.97194
							-7.8251	-2.66738		-10.8938
							-2.24898	-2.75358		-9.05462
							-2.24119	-3.59032		-10.212
							-8.1378	-2.9465		-12.3899
							-7.84487	-2.62448		-10.6119
							-7.45185	-2.34974		-12.6092
							-1.86547	-3.91226		-12.5307
							-2.52872	-2.45329		-12.6671
							-4.24576	-2.28234		-12.6812
							-7.84334	-3.28676		-12.505
							-3.90403	-2.88216		-9.70394
							-2.99534	-2.28432		-10.0208
							-7.81632	-2.57623		-12.2408
							-6.93682	-2.45368		-12.5709
							-2.50074	-3.80931		-11.6979
							-2.22042	-3.05042		-12.6513
							2.22873	-2.30898		-12.0457
							-4.02731	-3.39979		-12.6175
							-8.35615	-2.95988		-12.624
							-4.12947	-2.74038		-12.5675
							-7.71819	-3.32641		-11.3131
							-3.68315	-4.39045		-9.57708
							-7.83118	-2.47878		-12.6104
							-2.44406	-2.28638		-12.4097
							-8.10861	-2.93219		-11.0063
							-7.94463	-3.19158		-12.5399
							-7.93114	-3.81805		-12.3862
							1.94168	-4.67227		-12.2667
							-2.00342	-4.33925		-9.39668
							-6.07727	-2.69833		-10.8072
							-2.44969	-3.72545		-9.8594
							-8.07645	-3.19765		-11.9712
							-8.4005	-2.41856		-10.4089
							-1.80501	-3.58352		-12.4877
							-4.335	-4.39813		-9.66612
							-7.79115	-3.78117		-12.4644
							-3.07968	-2.95243		-12.4391
							-7.66658	-2.33737		-12.436
							-8.37472	-2.70661		-12.455
							-2.33382	-5.05754		-12.231
							-8.19481	-3.1715		-10.1476
							-8.46249	-5.40131		-12.2228
							-2.36094	-4.15969		-11.3429
							-2.01575	-3.42843		-11.9578
							-2.74001	-5.06635		-12.2474
							-6.57365	-3.99013		-12.3049
							-4.15935	-2.57553		-12.2342
							-7.50685	-3.7235		-12.2135
							-2.10002	-5.51291		-12.1066
							-1.67373	-2.47308		-11.7128
							-2.14887	-5.00285		-11.1767
							-8.3234	-4.65261		-10.9168
							-7.48432	-3.48335		-11.9638
							-7.82978	-3.03622		-12.0953
							-2.66556	-4.02039		-9.76996
							-3.84991	-3.37001		-10.7338
							-2.50978	-4.62934		-11.9543
							-3.3054	-6.03546		-9.87343
							-3.93534	-5.57893		-12.058
							-8.19936	-2.90338		-11.6128
							-1.72731	-4.3427		-10.2628
							-2.0715	-3.8832		-10.4591
							-7.58102	-5.56285		-11.4728
							2.31208	-2.71288		-11.663
							-8.07978	-5.02338		-11.9386
							-7.85587	-3.44593		-11.8931
							-3.68506	-5.42419		-10.0927
							-2.36953	-3.80205		-11.9077
							-6.90432	-6.23989		-11.846
							-3.34845	-6.5795		-10.6622
							-5.41392	-4.34153		-11.7571
							-2.13711	-4.98124		-11.6191
							-8.50095	-3.26825		-11.6578
							-8.40189	-5.46546		-11.7477
							1.83567	-5.95602		-11.1158
							-2.40505	-4.69781		-11.212
							-8.15174	-3.07091		-10.879
							-7.57067	-6.29889		-11.6243
							-3.95911	-6.72434		-11.2703
							-7.93057	-3.94498		-10.3107
							-7.77059	-4.20099		-11.3212
							-8.55092	-4.5867		-11.4878
							-2.31722	-5.93485		-11.3768
							-8.05496	-3.73431		-10.4882
							-3.0748	-7.05595		-11.5295
							-8.27968	-6.23337		-10.1192
							-6.3802	-5.29618		-11.401
							-3.44529	-5.70678		-11.3708
							-2.33807	-3.45336		-11.0826
							-5.96802	-6.6955		-10.0962
							-4.38288	-5.0472		-10.679
							-7.93915	-4.68528		-10.7978
							-1.51282	-6.4367		-11.207
							-2.70746	-7.17716		-11.0206
							-2.31288	-7.46748		-11.2041
							-7.75584	-5.8468		-10.7809
							-4.75756	-4.51314		-11.0557
							-7.7253	-7.17691		-10.6735
							2.23979	-4.18678		-10.9347
							-1.91031	-3.84635		-11.1106
							-4.11822	-5.47528		-10.3963
							-7.90413	-5.05721		-10.7477
							-1.83391	-6.38461		-10.3056
							-2.46955	-6.82222		-10.7828
							-8.17054	-7.12031		-10.9525
							-2.50275	-7.58143		-10.4032
							-7.75827	-7.82747		-10.7907
							-7.59702	-4.26154		-10.4813
							-2.77169	-5.53819		-10.6168
							-2.03331	-7.47952		-10.8583
							2.22315	-6.28641		-10.4348
							-7.87126	-7.25392		-10.7492
							-2.21797	-6.76309		-10.5288
							-1.8882	-5.16677		-10.336
							-8.05504	-4.70981		-10.6211
							-7.80435	-5.92489		-10.3355
							-8.54726	-7.24944		-10.7061
							-2.37138	-8.14717		-10.4449
							-1.33027	-7.9319		-10.1171
							-2.18773	-7.69283		-10.4482
							-8.5771	-6.34193		-10.0371
							2.24779	-5.16735		-10.3269
							-7.34287	-6.92455		-10.5301
							-3.66267	-5.86064		-10.4428
							-8.35928	-8.42173		-10.1209
							-8.47817	-5.65218		-10.5084
							-7.64721	-7.63376		-10.5791
							-3.95422	-6.83196		-9.88307
							-4.36451	-8.20932		-10.126
							-8.33227	-6.15484		-10.548
							-5.68859	-7.52888		-10.5304
							-3.68852	-8.66706		-10.3012
							-2.7158	-6.70522		-9.88505
							-7.655	-8.19321		-10.5029
							-7.64485	-7.30246		-10.1359
							-6.25286	-8.89073		-10.5242
							-6.76004	-7.93066		-9.75119
							-2.19935	-8.53687		-10.3632
							-8.1544	-9.07794		-10.5343
							-3.13097	-8.56338		-10.4993
							-7.95115	-9.21479		-10.1838
							-4.4267			-9.94295
							-3.41312			-10.3978
							-2.11203			-9.76454
							-7.90775			-10.2496
							-8.21681			-10.0401
							-8.06992			-10.604
							-1.81432			-10.5247
							-1.20419			-10.4278
							-2.11467			-9.89752
							-2.31159			-10.3124
							-4.0792			-10.0533
							-7.91521			-10.6353
							-7.6895			-10.2468
							-2.44739			-10.567
							-4.24608			-10.4218
							-2.41478
							-8.43701
							-7.83527
							-2.90715
							-7.63675
							-8.47651
							-8.47532
							-1.59071
							-7.56057
							-3.76038
							-1.95793
							2.21785
							-5.06364
							-2.28751
							-2.65966
							-8.00876
							-7.94714
							2.36115
							-1.92159
							-3.48281
							-3.15301
							-2.69933
							-2.06274
							-1.67979
							-8.25376
							-6.52512
							-7.72372
							-7.10233
							-7.86249
							-7.59518
							-2.13724
							-7.49266
							-2.25027
							-5.78676
							-2.95783
							-2.23412
							-6.77892
							1.80673
							-3.51453
							-4.21981
							-2.62327
							-8.09155
							-4.45956
							-1.35271
							-2.14727
							-7.85701
							-4.11521
							-3.87364
							-7.54806
							-8.2052
							-7.87844
							-2.44121
							1.9489
							-7.33659
							-8.06479
							-8.18166
							-2.76298
							-2.0891
							-2.45362
							-1.27269
							-7.8082
							-1.76608
							-8.16312
							-7.34828
							-7.47654
							2.23479
							-2.34263
							-2.52125
							-7.3707
							-7.87952
							-3.00667
							-4.93549
							-6.3279
							-8.04957
							-3.15297
							-7.84139
							-7.97386
							2.21036
							-2.26239
							-1.90916
							-8.09732
							-7.8615
							-3.63276
							-3.05922
							-3.32167
							-1.92707
							-7.25212
							-4.47273
							-2.31119
							-1.6051
							-4.23845
							-1.77965
							-3.94085
							-7.87441
							-7.45262
							-6.50574
							-7.33365
							-2.55867
							-2.72799
							-7.12236
							-2.27193
							-5.92365
							-5.40329
							-7.93885
							-2.66815
							-7.81122
							-6.81802
							-2.51376
							2.00191
							-7.6691
							-7.92972
							-7.82176
							-1.58765
							-2.79375
							-7.47235
							-2.25993
							-7.82401
							-1.85166
							-2.43901
							2.01471
							-4.07304
							-7.82051
							-7.74329
							-7.14258
							-7.81197
							-7.20677
							-2.41588
							-3.13991
							2.49719
							-3.38001
							-2.74051
							-2.93505
							-7.17474
							-7.60028
							-2.36149
							-7.59185
							-7.7759
							-2.57658
							-3.76204
							-7.43134
							-1.91278
							-4.50353
							-3.75095
							-4.71965
							-7.75535
							-2.20139
							-1.96755
							-7.02561
							-2.39106
							-2.74347
							2.09806
							-7.74072
							-2.79177
							-5.40256
							-1.63868
							-6.90514
							-7.70394
							-7.72641
							-1.74968
							-6.83205
							-7.70572
							-2.03138
							-5.85809
							-2.39992
							-2.01718
							-6.26566
							-2.39158
							-6.95914
							-7.45248
							-1.91384
							-4.18317
							-2.34539
							-7.16534
							-2.29267
							2.17288
							-6.97195
							-7.65014
							-6.8209
							-2.38894
							-2.52093
							-3.40075
							-2.6298
							-7.58919
							-3.95621
							-2.74943
							-3.44162
							-6.95903
							-6.76328
							-3.09195
							-2.48611
							-7.23896
							-6.97431
							-5.08389
							-4.56371
							-6.57414
							-6.74208
							2.11987
							-5.52779
							-1.71192
							-3.0168
							-6.6443
							-3.74914
							-1.78316
							-2.72605
							-7.60551
							-7.02463
							-7.58979
							-4.1434
							-7.65543
							-7.55457
							-2.0612
							-7.62551
							-5.92437
							-2.47667
							-2.58955
							-6.56127
							-6.60674
							-2.06871
							-4.38386
							-6.58552
							-3.08739
							-2.32058
							-2.4736
							-2.48257
							-2.02857
							-2.66791
							-7.60733
							-6.21554
							-2.38009
							-6.46741
							-4.13327
							-7.43393
							-2.61284
							-4.80296
							-2.41228
							-3.49944
							-7.58675
							-3.29707
							-6.42564
							-6.54691
							-2.99181
							-6.25123
							-7.2047
							-6.32795
							-2.59151
							-2.85967
							-1.95771
							-4.66181
							-6.19485
							-3.80982
							-5.35449
							-2.78865
							-7.60513
							-3.00001
							-3.83594
							-3.31746
							-7.53321
							-2.07394
							-2.07022
							-2.1616
							-7.58739
							-5.94754
							-5.5363
							-2.48345
							-6.67333
							-4.37762
							-2.57981
							-5.65339
							-6.2866
							-2.55946
							-6.29968
							-2.24024
							-2.65997
							-6.37114
							-7.62937
							-2.4509
							-3.25864
							-7.46778
							-7.30434
							-2.91881
							-4.48653
							-6.2265
							-7.03576
							-6.30601
							-2.5625
							-2.55328
							-7.20203
							-2.83328
							-7.54242
							-2.27967
							-3.13618
							-3.3578
							-3.38242
							-3.62156
							-2.27825
							-6.11519
							-5.4989
							-2.65723
							-4.03227
							-7.715
							-2.81474
							-5.98027
							-3.44513
							-6.01374
							-7.37338
							-4.72572
							-2.29194
							-6.18143
							-6.03559
							-6.77163
							-2.64499
							-4.35141
							-2.75149
							-6.0431
							-7.7358
							-3.80693
							-6.58105
							-3.40836
							-2.53452
							-6.33503
							-4.01944
							-7.62402
							-3.1364
							-5.93227
							-2.26441
							-4.90536
							-3.18485
							-7.55074
							-5.65336
							-5.376
							-3.37986
							-2.53424
							-5.76854
							-7.1782
							-5.72704
							-3.33132
							-5.41376
							-5.80983
							-2.92963
							-2.67718
							-7.29343
							-3.59515
							-2.87666
							-5.92997
							-5.97693
							-2.5676
							-3.54169
							-6.9681
							-3.5754
							-2.78484
							-2.77709
							-3.02886
							-4.59677
							-2.87676
							-5.69886
							-3.44495
							-5.74322
							-3.24286
							-5.69568
							-2.69508
							-5.95801
							-6.07388
							-5.20844
							-3.17282
							-3.31186
							-5.70103
							-6.53777
							-3.72019
							-7.71608
							-2.43364
							-4.78844
							-2.54337
							-7.94163
							-2.4384
							-7.95592
							-4.17066
							-7.87595
							-2.718
							-7.65291
							-7.25754
							-4.89342
							-2.97551
							-4.23661
							-5.81007
							-3.39033
							-5.53833
							-6.65819
							-5.45549
							-5.06816
							-3.62413
							-4.45342
							-3.66934
							-3.46623
							-2.79151
							-5.55901
							-3.5656
							-3.02373
							-4.7535
							-5.75685
							-2.77543
							-2.97471
							-3.19901
							-5.70838
							-6.07151
							-5.6649
							-3.30324
							-4.61714
							-3.41672
							-5.57164
							-5.87169
							-3.51274
							-2.90858
							-5.66514
							-5.53716
							-5.94585
							-3.64777
							-3.11151
							-4.7221
							-8.11207
							-2.94031
							-2.94185
							-3.03119
							-2.91433
							-6.32998
							-5.61668
							-8.01745
							-3.97096
							5.43117
							-8.21735
							-4.89457
							-5.81399
							-3.38487
							-3.73998
							-5.58231
							-3.68562
							-3.86396
							-3.11961
							-3.73544
							-4.60257
							-7.30084
							-4.2674
							-6.07594
							-5.74955
							-4.28712
							-3.35283
							-3.17491
							-3.40367
							-6.80292
							-6.48217
							-5.65913
							-3.29778
							-3.59624
							-7.52108
							-7.84134
							-3.75022
							-6.17003
							-5.64304
							-3.65923
							-2.99803
							-5.85101
							-5.46261
							-3.743
							5.45018
							-4.61151
							-5.88098
							-3.80009
							-5.75192
							-4.53967
							-5.98981
							-8.56192
							-3.22154
							-3.53765
							-3.40002
							4.95055
							-5.40196
							-3.79707
							-4.12621
							-5.96316
							-3.22098
							-8.2425
							-3.19948
							-6.16238
							-4.11112
							-3.32973
							-6.11373
							-3.77882
							-3.4846
							-3.33726
							-3.24282
							-3.0823
							-3.83971
							-3.80884
							-3.34223
							-7.75731
							-8.4555
							-3.51368
							-6.06232
							5.9193
							-3.85198
							-4.9779
							-8.53739
							-3.71295
							-3.93427
							-6.39376
							-3.64026
							-4.39519
							-7.16672
							-6.93988
							4.79762
							-5.80556
							-6.23649
							-8.14353
							-5.67762
							-5.30632
							-3.34273
							-6.11513
							-3.86527
							-6.48494
							-3.27881
							-6.12235
							-7.21253
							-3.53993
							-3.72924
							-3.85823
							-3.70487
							-6.2537
							-6.07683
							-6.63872
							5.43774
							-4.75498
							-3.85065
							-8.3899
							-6.91046
							-3.94479
							-3.22604
							-3.94666
							-5.93728
							-3.32273
							-7.91394
							-3.50715
							5.73954
							-3.84369
							-4.17776
							-5.99536
							-3.51339
							-3.30664
							-4.60311
							-6.24324
							-3.7912
							-3.58056
							-8.7896
							-3.96198
							-8.92516
							-3.89942
							-3.53458
							-4.46286
							-5.72542
							-3.66571
							-3.41279
							-5.41748
							-3.75617
							-8.55603
							-5.0733
							-3.33896
							4.93701
							-3.816
							-3.69466
							-8.78049
							-4.20371
							-6.6465
							-5.80692
							-5.61259
							-6.7426
							-7.62634
							-3.90858
							-6.21061
							-8.65839
							-5.16803
							-6.06566
							-7.1842
							-3.39118
							5.55272
							-6.44425
							-3.86109
							-4.01587
							-6.8033
							-6.99886
							-6.93283
							-3.50678
							-5.65857
							-3.96934
							5.13961
							-3.81844
							-4.24065
							-4.01223
							-6.37929
							-3.95638
							-6.88344
							-3.99873
							-4.84015
							-8.08846
							-3.44216
							-3.49172
							-4.69692
							-3.76981
							-3.44786
							6.46191
							-3.62651
							-3.57537
							-4.00002
							-8.28973
							-6.4151
							-7.56238
							-3.84781
							-6.48746
							-3.87184
							-8.59992
							-3.97215
							-4.03022
							-5.45956
							-3.83701
							-6.37255
							-5.19376
							-4.59385
							-5.88046
							-5.37057
							-5.14655
							-6.89333
							-9.28015
							-3.76717
							-5.60114
							-7.58258
							-6.97112
							-6.31925
							-7.09976
							-5.68109
							-8.88322
							-3.91183
							-3.53766
							-9.06929
							-7.9021
							-4.10836
							-6.44298
							-3.93423
							-4.38151
							-5.1466
							-5.40964
							-4.01295
							-7.34506
							-6.98258
							-6.94358
							-4.81297
							-4.03321
							-4.54758
							-3.68329
							-3.6892
							-4.24256
							-7.05002
							-7.15576
							-3.63354
							-3.93774
							-3.6692
							-6.6261
							-8.19806
							-4.88503
							-6.89861
							-5.57987
							-6.75466
							-3.98506
							-3.74162
							-3.97646
							-5.43331
							-8.31063
							-3.80466
							-6.18531
							-3.83189
							-3.89038
							-5.32776
							-6.59122
							-4.59847
							-8.56454
							-5.2402
							-6.20204
							-3.97595
							-6.75161
							-6.79328
							-7.294
							-7.01934
							-4.13135
							-4.01098
							-4.10701
							-6.95125
							-7.03425
							-3.64764
							-5.67697
							-3.95968
							-8.09015
							-4.02887
							-7.08518
							-5.99641
							-4.01738
							-9.07634
							-4.01486
							-7.14348
							-5.14544
							-7.42644
							-7.66669
							-3.97219
							-7.92559
							-6.67248
							-3.98539
							-3.71174
							-9.24572
							-6.17687
							-3.77428
							-3.90667
							-8.32928
							-4.0468
							-7.6899
							-7.81897
							-3.91017
							-3.86546
							-5.57698
							-7.49631
							-9.13172
							-3.81754
							-4.44533
							-8.22981
							-7.52892
							-8.47897
							-7.48274
							-3.914
							-4.36665
							-6.80457
							-3.92309
							-4.07645
							-3.93328
							-3.97073
							-7.58658
							-5.74819
							-4.90213
							-5.92962
							-4.19962
							-5.306
							-4.11154
							-6.04061
							-7.94747
							7.12238
							-8.92061
							-4.00408
							-4.02217
							-4.77931
							-3.71798
							-6.51113
							-7.39641
							-5.89717
							-6.86127
							-4.08985
							-3.74612
							-8.27398
							-7.05428
							-6.67299
							-8.31001
							-3.98318
							-7.25197
							-6.46803
							-6.73745
							-6.12556
							-6.15071
							-6.94883
							-7.02303
							-5.87488
							-5.87337
							-7.05159
							-7.05715
							-7.01982
							-6.91284
							-5.50744
							-6.80271
							-5.38342
							-3.7412
							-3.81234
							-3.7693
							-3.89833
							-3.91933
							-6.67036
							-3.82368
							-3.95226
							-3.95287
							-3.87386
							-3.91605
							-3.87852
							-3.8395
							-3.95696
							-4.94801
							-3.85384
							-6.37619
							-4.00179
							-3.88662
							-4.05391
							9.59784
							-9.11979
							-12.9046
							-3.89711
							-4.75301
							-3.90722
							-6.21298
							-4.17637
							-4.2087
							-7.95164
							-7.79799
							-3.9289
							-9.882
							-3.9361
							-6.14972
							-4.58662
							-7.54607
							-4.36048
							-7.3099
							-4.39223
							-6.81883
							-7.10953
							-3.95986
							-7.18778
							-4.5341
							-4.02712
							-4.35351
							-9.40488
							-4.62358
							-4.03407
							-4.72547
							-4.25421
							-8.97267
							-4.04117
							-4.15204
							-4.98449
							-4.14056
							-4.00437
							-4.00014
							-3.96725
							-3.99939
							-3.95857
							-3.90103
							-3.90543
							-3.92218
							-5.33102
							-8.61846
							-8.82297
							-8.96804
							-7.23418
							-7.18881
							-7.61682
							-7.6936
							-6.9404
							-8.28207
							-7.00789
							-7.8309
							7.50889
							7.07165
							-7.74593
							-7.7337
							-7.7743
							-7.91955
							-8.14977
							-8.217
							-8.43107
							-8.34807
							-8.2683
							-8.16965
							-8.18667
							-8.24974
							-8.34055
							-8.59646
							-8.76106
							-9.08215
							-9.20474
							-9.29792
							-7.6826
							-3.98012
							-8.29558
							-7.0847
							-8.13865
							-8.50935
							-3.82318
							-4.03362
							-7.74508
							-6.7091
							-9.67752
							-7.53363
							-3.79401
							-4.8674
							-4.09779
							-3.99066
							-8.85597
							7.5553
							-9.40216
							-6.32588
							-4.21288
							-5.40273
							-4.29203
							-6.21678
							-5.02095
							-6.27735
							-7.96806
							-3.99703
							-3.92328
							-4.0292
							-3.96297
							-7.31125
							-4.47333
							-3.96727
							-8.47627
							-10.8778
							-8.11426
							-8.48483
							-4.56061
							-3.84113
							-9.14793
							-8.24773
							-5.95908
							-3.92168
							-3.87104
							-10.7547
							-8.06828
							-4.03139
							-8.22581
							-3.90967
							-3.92613
							-8.27696
							-9.31779
							-3.79396
							-4.04143
							-7.32419
							-8.45646
							-4.05539
							-11.217
							-7.9108
							-5.48245
							-10.5257
							-4.10796
							-9.09706
							-4.20792
							-7.76929
							-8.14869
							-4.00731
							-8.6047
							-4.16238
							-7.30761
							-3.80142
							-7.47095
							-12.0625
							-4.34468
							-4.00829
							-4.32694
							-10.9237
							-8.16391
							-10.1914
							-6.89361
							-3.95111
							-8.61673
							-5.42052
							-8.62039
							-4.86783
							-7.78179
							-6.23861
							-3.84923
							-4.08298
							-5.79853
							-3.94796
							-8.43821
							-6.30937
							-4.11591
							-3.90725
							-3.9911
							-7.87576
							-6.95697
							-9.84525
							-5.09447
							-8.56884
							-7.59845
							-3.85084
							-4.09472
							-3.89095
							-8.62757
							-8.05285
							-4.47388
							-3.94652
							-3.97659
							-4.74485
							-4.08457
							-5.47677
							-11.5255
							-11.8072
							-8.20221
							-3.9593
							-7.60919
							-6.12114
							-4.90499
							-4.10734
							-10.4227
							-4.57754
							-8.69696
							-9.35147
							-3.81218
							-3.83479
							-8.97784
							-7.79776
							-8.57927
							-9.35109
							-8.27515
							-8.59166
							-8.443
							-3.79497
							-6.68257
							-8.44121
							-5.41626
							-7.13675
							-10.0113
							-5.36862
[truncated: 1,603 more rows]

## Sheet: Blad7
	mean	std	95low	95up	surface		face	forehead	nose	cheeks	upper lip	chin
face	2.1534	6.25664	-10.9377	9.12843	16767		-4.49177	-14.0142	3.8641	-4.74356	5.52535	6.39576
forehead	1.41904	5.89873	-11.5955	6.54781	4123		-5.70525	-14.1431	3.53492	-5.73199	5.78959	6.92268
nose	1.8222	2.19617	-2.68025	4.20759	793		-7.1441	-12.8527	3.32804	-4.21691	5.16621	7.49185
cheeks	1.90247	7.46932	-13.2077	10.1531	4272		-4.19075	-13.2341	3.88278	-6.75868	5.84949	5.79682
upper lip	2.14191	3.74258	-6.61582	5.74489	600		-6.63322	-14.3419	3.01591	-4.26071	4.72889	5.20007
chin	5.22165	1.40939	3.04652	7.42332	470		-8.40046	-11.9897	4.29306	-5.29423	5.57993	4.58614
							-5.71309	-14.5779	4.02687	-4.84744	4.22373	6.27158
							-4.70241	-12.5476	2.54806	-6.10834	5.19627	4.23456
							-5.55211	-14.8113	3.77998	-6.87947	5.75349	7.25924
							-9.75678	-11.2708	3.82346	-7.70143	5.90259	5.16698
							-7.68257	-13.4585	4.36263	-4.98895	5.9142	3.87676
							-3.92235	-15.016	2.13377	-5.66439	5.28338	4.45834
							-6.90329	-11.5145	3.00577	-5.65538	3.74599	6.03227
							-6.10529	-13.6557	3.93115	-6.49128	5.62418	3.60268
							-3.7749	-12.3352	4.04051	-5.3489	5.51071	7.19235
							-7.50797	-15.1002	2.04277	-5.77219	4.59885	5.05886
							-5.05279	-10.7028	4.75558	-7.243	3.00124	4.00297
							-4.88258	-14.3795	2.52059	-7.76594	4.0559	3.28537
							-11.0497	-12.7185	4.30293	-6.66183	5.86442	4.6053
							-9.84286	-15.0275	4.44457	-6.62148	5.06283	7.36232
							-5.98367	-13.4277	4.11631	-8.1093	5.74886	6.73447
							-4.42919	-11.2696	3.20622	-5.90819	3.8641	5.8688
							-5.95316	-10.6195	3.48717	-8.41732	3.45267	3.71484
							-4.10031	-10.2266	1.89198	-6.27504	4.64239	3.09071
							-9.70663	-11.5485	2.39986	-6.64702	5.05159	5.70031
							-7.96915	-13.3455	4.24414	-7.68721	5.50912	4.60929
							-8.85558	-14.8799	2.78478	-8.16225	5.73297	7.54303
							-3.88041	-13.9887	3.63251	-6.48124	3.88278	3.12735
							-7.23314	-11.7406	3.91372	-7.71566	4.0912	3.36468
							-5.70334	-10.9416	2.87772	-8.10638	4.36316	3.76498
							-4.47816	-12.2031	1.83242	-8.43435	3.77998	6.64242
							-12.0483	-10.5306	5.17458	-6.95216	4.57885	4.18639
							-4.74356	-13.081	2.87072	-7.44348	5.47773	3.43726
							-6.9097	-14.6098	2.69845	-7.77026	3.08658	5.72901
							-5.73199	-9.74943	2.1034	-7.15204	4.94341	7.77629
							-10.836	-10.1581	2.55698	-7.56013	4.07842	2.81495
							-4.21691	-10.2567	3.52408	-8.59712	3.93115	3.81847
							-11.0304	-10.5869	1.91521	-8.88248	4.53567	4.81182
							-9.96379	-11.1532	4.20353	-7.88159	3.59879	3.5569
							-7.31434	-12.9795	2.38603	-8.77316	5.24155	6.53426
							-8.76263	-12.2898	2.45415	-7.9826	4.87285	7.39001
							-5.06692	-14.1856	4.31313	-8.26871	4.24414	5.61278
							-6.75868	-13.8609	2.98116	-8.82309	4.30125	7.93931
							-4.26071	-9.91661	2.3285	-8.73762	4.70979	3.04801
							-8.11146	-13.4108	2.06225	-8.7994	3.88855	2.62638
							-8.36554	-11.572	2.13682	-8.73267	5.03764	3.70265
							-10.7815	-9.35779	2.24424	-9.10519	4.50879	4.73188
							-5.29423	-9.58674	2.36119	-8.98019	4.91387	6.25934
							-9.44749	-10.4457	2.37716	-9.31805	4.20353	2.98
							-6.30441	-12.8279	2.32287	-9.09581	4.65207	6.98311
							-12.7669	-12.1611	1.9891	10.1019	4.35331	8.05817
							-10.0613	-9.83779	2.5434	-9.41849	4.99295	3.29464
							-4.84744	-13.6478	2.1328	-9.31104	4.1813	3.00923
							-6.10834	-10.992	4.29831	-8.84303	4.44496	3.97244
							-8.44181	-11.4535	4.1813	-9.37069	4.57035	4.93557
							12.3415	-10.0628	3.00213	-9.00652	4.68561	6.66412
							-6.87947	-8.99766	2.36301	-9.99984	3.9546	3.62081
							-7.70143	-13.2215	3.87213	-9.7173	4.48123	7.38345
							-8.6892	-10.2966	2.16778	-10.2712	3.15437	3.26924
							-8.12329	-12.1372	1.81336	-9.92448	4.28791	7.93239
							-4.98895	-12.4988	2.28476	-9.98515	3.89901	5.55114
							-5.66439	-12.8027	2.46431	-10.3091	4.0685	3.57627
							10.4678	-9.2222	2.21236	-10.2355	-3.81634	7.41587
							-11.2249	-9.62126	2.2736	-10.5187	-3.88254	4.50012
							-5.65538	-13.0249	2.42527	11.4122	3.82515	7.13514
							-6.96348	-11.481	2.55928	-9.58732	3.95811	3.92628
							-12.0194	-9.80231	1.92883	-8.91029	3.96887	6.23894
							-10.036	-10.3405	2.35458	-11.202	3.74542	3.80653
							-6.49128	-12.7845	2.40886	-11.1289	3.80961	3.01827
							-8.54426	-10.8554	1.63367	-10.9352	3.67851	3.09489
							-9.18032	-11.6686	2.37049	-8.8996	3.54679	3.71907
							-5.3489	-8.7591	3.15437	-11.4044	3.5753	4.45425
							-5.77219	-9.16167	2.33484	-9.43224	3.62091	4.89961
							-7.243	-12.1312	3.88598	-11.4344	3.58352	5.1229
							-7.76594	-9.89466	2.14098	-11.2021	3.40283	5.69118
							-9.6153	-12.3602	1.48738	-10.8209	3.51564	5.99109
							-13.2193	-10.232	2.90391	-9.24549	3.69453	6.51339
							9.38103	-12.3692	2.61278	-12.0931	-3.06967	6.72496
							-6.66183	-9.52482	1.60244	-11.9017	3.11788	6.9081
							13.7537	-11.6944	1.65619	-10.0981	-6.84348	7.25429
							-6.62148	-10.7695	-1.59645	12.6841	-5.74838	7.41971
							-8.1093	-12.1258	-1.6748	-10.5431	-3.12282	7.6385
							-5.90819	-9.18406	1.73825	-12.238	3.03955	6.22705
							-7.84518	-8.53587	1.91074	-11.6952	-7.20167	3.90866
							-8.41732	-10.2353	-1.84974	-12.5718	-3.45556	6.91838
							-12.4249	-11.7967	-1.95121	-12.712	-9.09609	4.45834
							-8.88768	-11.0535	2.39294	-9.88735	3.04158	6.97481
							-10.7022	-11.9168	2.46659	-12.2828	-8.47382	3.22057
							-6.27504	-11.4828	2.62096	-12.8336	-5.09124	5.46423
							12.2061	-9.77424	2.83059	-9.13991	-7.74168	7.28248
							-6.64702	-9.35588	-2.17894	-13.014	-2.43392	3.25298
							9.36172	-11.6658	2.99772	-12.7131	-8.48398	6.80203
							-7.68721	-8.7521	-2.23681	-13.2056	-5.47596	3.66311
							-8.68951	-11.0479	3.22395	-11.4114	3.10389	6.63798
							-8.16225	-11.5436	-2.40851	-9.70721	-8.27992	5.02931
							-6.48124	-10.3953	3.62688	-9.44633	-5.20507	4.25455
							-7.71566	-8.96363	2.47151	13.8337	-2.0635	2.79192
							-8.10638	-11.0673	3.88813	-13.2099	-5.93284	3.38337
							-11.2603	-9.74715	3.74542	-8.86729	3.33685	6.79888
							-13.5261	-8.15746	2.48844	-12.4762	-5.07164	6.26508
							-9.95061	-11.1588	2.42924	-10.1841	-2.3321	2.95395
							-9.38973	-8.48041	2.40383	-8.7311	2.28918	5.98854
							-8.43435	-11.2247	2.40526	-13.9531	-1.06522	4.92003
							-6.95216	-10.8861	2.3705	-13.9183	-2.30095	3.89337
							-7.44348	-11.1641	2.72084	-10.5238	3.35663	3.20327
							-7.77026	-9.96617	2.46108	-10.984	-2.15724	3.2815
							-7.15204	-9.04384	2.47424	-12.0212	-1.87283	6.332
							10.9175	-10.3337	2.60432	-13.0155	2.79839	5.3707
							-7.56013	-10.783	2.57752	-14.2019	1.85131	6.01207
							15.2268	-10.5991	2.5464	-14.1074	1.42592	5.99991
							-11.7438	-9.5202	2.78604	-14.0267	1.34	3.69033
							-8.59712	-10.8922	2.79	-13.5731	-1.33835	4.77576
							-9.11106	-8.3934	-1.89738	14.8092	1.93894	4.29097
							-8.88248	-7.59594	1.94782	-11.4258	2.50491	3.68703
							-12.73	-8.8742	3.62988	-14.8222	2.78219	5.8945
							-7.88159	-10.1486	2.51879	-9.52493	1.44135	5.23132
							-8.77316	-10.5363	3.69453	-13.3158	2.21053	4.09958
							-7.9826	-10.0982	-2.54192	-14.8053	-1.42313	4.60477
							-8.26871	-10.5624	-2.14389	-15.0914	2.27246	5.62005
							-8.82309	-7.81284	2.69396	-14.1902	1.21919	4.56024
							-8.73762	-9.56757	2.58463	-14.9943	1.98205	4.30873
							-8.7994	-10.5062	-2.32389	-8.8461	3.55807	4.28727
							14.5602	-10.1372	2.87555	-14.6074	-1.16775	5.74573
							-8.92075	-9.01632	2.85567	-9.98654	3.96779	4.86929
							-13.7072	-9.99086	-2.52835	-12.6955	2.62113	5.13872
							12.0477	-9.58404	2.61844	-9.20895	2.95772	4.80362
							-10.2764	-8.04017	-2.21789	-10.6556	2.50147	5.03076
							-8.73267	-10.2348	2.71401	-8.47958	1.76521	5.28248
							-9.10519	-10.3465	-2.33025	-15.5903	-1.16283	5.38856
							-8.98019	-9.31379	2.57673	-15.5117	3.73701	5.40416
							-9.31805	-9.70496	3.37401	-15.6391	1.38277	5.15496
							-9.45999	-8.44584	2.6612	-11.0162	3.30919	5.29027
							-9.09581	-9.43906	2.48811	-13.9223	1.9354	5.4044
							10.1019	-10.152	3.03955	-15.7075	2.91716	5.33726
							-11.0131	6.97632	3.90984	-8.9065	2.46276	5.60122
							-9.41849	-9.79227	-2.55492	-11.5432		5.56325
							-11.7616	-9.91068	2.95692	-14.6984		5.42181
							16.7162	-8.71764	-2.50684	-15.3475		5.5928
							-9.31104	7.23251	2.76759	-15.1516		5.73516
							-8.84303	-9.14576	-2.66382	-12.9078		5.59409
							-9.75928	-9.51865	-2.65221	-15.6583		6.23041
							-9.37069	-9.77236	2.67433	-12.2488		5.92282
							14.4071	-7.56887	2.66362	-15.9778		5.80623
							-9.1969	-9.89438	2.56996	-13.402		5.91971
							12.1803	-7.99404	-2.61925	-9.68413		5.96327
							-9.00652	-8.50243	-2.58451	-9.23853		6.06786
							-9.99984	-8.7415	3.66157	-16.1755		6.99117
							-9.7173	-9.43138	-2.66678	-16.1285		6.54122
							-10.2712	-8.13008	2.69547	-15.698		6.24134
							-9.92448	-9.30116	3.04158	-14.4837
							-14.0142	6.48931	2.46346	-15.0226
							-12.5739	-8.60905	2.57214	-10.6019
							-9.98515	-9.59866	-2.6857	-13.9302
							-10.3091	-8.97714	2.60831	-10.0776
							-10.2355	-9.57087	-2.70292	-8.38913
							-10.5187	6.89106	-2.80029	-11.0243
							11.4122	-8.78679	4.02508	-8.19784
							-9.89679	-7.41386	2.44001	-15.4704
							-10.4151	-9.48897	-2.76292	-12.3654
							-8.98606	-7.65494	2.55162	-16.3985
							14.2754	-8.94244	-2.78821	-8.7074
							-9.58732	-9.18977	-2.67964	-12.8915
							-8.91029	-9.17126	3.10389	-16.5401
							-11.202	6.36678	2.63995	-16.2826
							-11.1289	6.84257	2.51844	-9.66717
							12.8745	-7.61653	-2.93283	-11.4592
							-11.7611	-9.22782	-2.67085	-13.2712
							-10.9352	-7.74746	-2.96853	-9.27642
							-14.1431	-9.18119	2.68254	-14.6113
							-12.8527	-8.62127	-2.70553	-15.0764
							-8.8996	-8.12004	2.51275	-16.0339
							-11.4044	-7.99343	3.16756	-13.9884
							-9.43224	6.85337	2.53707	-8.78108
							-11.4344	-9.10576	-2.96915	-10.2585
							-11.2021	6.12235	3.33685	-11.5866
							-10.8209	-8.5005	-2.38978	-16.6646
							17.9695	-8.77131	2.34856	-12.0693
							-9.27947	6.94624	-2.57733	-12.6631
							-9.24549	-8.3026	-2.45554	-8.18017
							-12.0931	6.50404	3.35663	-15.2015
							-11.9017	7.76291	2.18805	-16.4903
							-11.0123	7.13331	-2.2612	-8.3986
							-10.0981	-8.6257	2.35471	-15.6151
							12.6841	-8.00453	2.06264	-10.6769
							16.5701	-7.12328	2.79839	-7.80389
							-10.4206	6.06926	1.96911	-9.63178
							-13.2341	-8.69525	2.02744	-13.8553
							-10.5431	5.8041	2.50491	-9.14391
							-12.238	-7.454		-7.79427
							-14.3419	-8.41006		-8.7875
							-11.6952	6.49193		-10.8569
							-12.5718	7.70734		-11.3125
							-11.9897	6.6096		-16.1377
							-12.712	7.99752		14.706
							-9.88735	-8.38036		-12.9231
							13.987	7.93083		-15.6746
							-12.2828	6.91681		-16.5346
							-12.8336	7.59549		13.9323
							-9.13991	8.39894		-12.1044
							-13.014	8.1129		-8.36589
							-12.7131	6.91111		-10.0714
							-13.2056	5.34637		14.7353
							-14.5779	-8.26476		-11.2026
							-9.69317	5.48277		15.1349
							-11.4114	5.93683		13.0701
							15.5311	6.44469		-9.41373
							-9.70721	5.99173		15.5383
							-9.44633	7.10671		-7.25173
							13.8337	7.85226		-10.533
							16.8363	7.14554		-16.1404
							-13.2099	6.07959		-7.79583
							-8.86729	8.08942		-8.73554
							-12.5476	7.3113		13.7025
							-14.8113	7.86097		11.4838
							18.9745	4.66193		15.6299
							-12.4762	7.44338		-7.39994
							-10.1841	6.55354		-8.22786
							-11.2708	5.14023		10.949
							-8.7311	5.35318		-7.10734
							-13.4585	5.98685		-9.71771
							-8.71399	4.92358		12.9745
							-8.87811	7.81731		13.9397
							-13.9531	7.86525		12.0516
							-13.9183	6.13107		11.6466
							-9.08614	7.4111		14.2702
							-10.5238	7.79441		-9.23613
							-10.984	6.59138		14.6086
							-12.0212	7.24853		10.3774
							-13.0155	7.46983		15.5025
							-15.016	7.52246		12.2228
							-14.2019	6.01645		-8.5044
							-10.026	6.40393		9.62147
							-14.1074	5.27956		14.7865
							-14.0267	4.05314		10.6221
							-13.5731	6.84418		-6.68176
							15.1155	4.65056		-8.08406
							-10.4511	5.24096		12.8944
							-11.5145	4.83281		-7.51606
							17.6818	7.54235		9.60076
							-13.6557	7.53927		-8.39929
							14.8092	5.48073		-6.73924
							-12.3352	7.05132		13.5423
							-15.1002	6.71409		10.9566
							16.5484	6.24918		14.7639
							-10.7028	5.46124		9.78958
							-9.05072	6.18169		-8.50591
							-11.4258	3.56707		8.85177
							-14.8222	7.06027		11.5378
							-9.52493	4.52233		10.4396
							-13.3158	7.31638		11.1711
							-14.8053	4.97077		-7.52542
							-15.0914	6.50082		12.0141
							-14.1902	4.55855		12.7498
							-14.9943	5.53876		-6.94832
							-8.8461	6.93649		13.6756
							-14.3795	7.22839		12.0091
							-14.6074	4.01349		13.9054
							-9.98654	6.13099		-7.41157
							-9.45107	5.51986		-6.10209
							-12.6955	4.97996		-6.53039
							-12.7185	6.50489		8.97484
							19.6699	5.72991		9.54943
							-15.0275	7.00082		10.2827
							15.8522	4.47541		8.58277
							-13.4277	3.1446		12.6131
							-9.20895	6.56558		-6.2033
							-10.6556	4.33531		9.80603
							-11.2696	6.93347		7.68577
							-8.51121	6.80707		13.0311
							-8.47958	3.37584		11.0119
							-15.5903	5.53159		10.1974
							-15.5117	6.1056		10.4752
							-15.6391	5.03943		-6.9239
							-11.0162	4.88582		7.22935
							-13.9223	6.5459		-6.65133
							-10.6195	3.71467		8.66743
							-10.2266	5.53405		7.82479
							-15.7075	2.82747		8.12182
							-8.34964	4.07534		-6.8648
							-11.5485	3.9359		8.87395
							-8.9065	6.1155		-6.07149
							-9.87122	6.2582		8.17846
							-11.5432	5.54074		11.4672
							18.2627	2.87681		12.118
							-14.6984	4.41005		-5.55649
							-15.3475	6.56511		10.6237
							-13.3455	5.15829		10.145
							-14.8799	6.5749		9.17282
							-15.1516	3.11368		9.43535
							-8.64034	5.78932		7.46741
							-12.9078	6.45366		-5.97953
							17.0062	4.28815		-5.52236
							-15.6583	4.73204		-6.32091
							-12.2488	6.20254		11.1971
							-15.9778	4.63991		8.43051
							-13.9887	2.57446		7.12129
							-13.402	5.7291		6.59165
							-11.7406	5.24841		6.89137
							-9.68413	3.44881		6.43627
							-10.9416	3.87489		-5.92295
							16.5827	6.38977		10.1611
							-9.36446	2.6786		7.38093
							-9.23853	6.15315		6.53687
							-16.1755	5.86942		7.68217
							-12.2031	5.13876		-5.52555
							-10.5306	6.26477		6.97212
							-16.1285	6.20546		10.3194
							-8.70109	5.46821		8.96496
							20.1675	4.21989		7.94753
							-13.081	3.72907		9.25328
							-15.698	5.89732		6.66687
							-14.6098	2.96387		-4.96342
							-14.4837	5.4136		8.11421
							-15.0226	3.66467		6.05744
							-9.74943	2.44302		6.34046
							-10.1581	6.18262		7.41841
							-10.6019	2.60912		-5.02277
							-13.9302	3.2567		5.84847
							-10.0776	4.14422		7.70337
							17.6222	4.46952		6.64616
							-8.38913	3.86118		-5.29986
							-7.99813	5.65426		-5.02069
							18.4602	5.8716		8.94761
							-11.0243	3.48322		5.40818
							-8.19784	5.99402		9.41048
							-15.4704	5.53886		6.39267
							-12.3654	4.81151		5.89502
							-16.3985	3.94499		7.78945
							-8.7074	4.75108		8.30502
							-12.8915	5.96841		6.66389
							-8.03871	5.09636		6.05154
							-16.5401	4.19779		5.90065
							-10.2567	3.39492		-4.8987
							-10.5869	2.39374		5.36813
							-11.1532	2.73136		5.40086
							-16.2826	5.01493		6.58697
							-9.66717	2.52521		7.64274
							-12.9795	3.34371		-4.55107
							-8.46682	4.34668		8.51825
							-8.01902	5.69027		6.10494
							-11.4592	4.48492		-4.39821
							-13.2712	5.19214		5.05323
							-16.8765	4.72916		7.9226
							-12.2898	3.81505		5.77375
							-14.1856	5.31854		5.33747
							-9.27642	3.66777		6.40615
							-14.6113	5.58177		5.46123
							-13.8609	5.8132		5.36112
							-15.0764	5.72078		5.96244
							-9.91661	3.04436		6.80464
							-16.0339	2.45768		-4.37264
							-13.4108	3.17315		4.49153
							-11.572	3.77197		5.0261
							-13.9884	3.46553		6.35325
							-9.35779	2.6853		5.16949
							17.457	4.23001		7.61802
							-8.78108	4.29839		7.0487
							-10.2585	3.45834		4.66186
							18.4308	5.55583		-4.09773
							-8.68903	2.4917		4.79945
							-11.5866	2.95718		4.53405
							20.4505	4.85389		-4.06357
							-16.8133	5.17384		4.25913
							-9.58674	3.58179		5.3141
							-10.4457	2.97036		5.0495
							-12.8279	5.59992		4.63931
							-16.6646	4.78026		4.72617
							-12.0693	3.82472		-3.81677
							-12.6631	4.41478		5.9557
							-8.18017	5.46016		5.64314
							-12.1611	5.22072		6.78623
							-15.2015	3.31136		4.44755
							-16.4903	3.99344		6.11989
							19.5816	2.7613		4.29332
							-8.3986	2.60553		-3.76183
							-7.5901	3.28492		3.76373
							-16.7401	4.50969		4.09991
							-15.6151	2.60081		-3.61119
							-10.6769	5.5725		3.93315
							-7.80389	3.69874		4.32429
							-9.83779	3.71031		6.1987
							-9.63178	2.54023		4.57473
							-13.6478	2.42768		3.86494
							-13.8553	5.27602		5.41084
							-10.992	3.02268		3.5419
							18.0234	5.43969		5.07664
							-9.14391	2.2896		3.99965
							-11.4535	5.18903		3.41967
							-7.79427	4.94206		4.7312
							-7.60734	4.1706		5.69024
							-8.7875	4.92014		5.4368
							-8.49452	2.7322		-3.28666
							18.7015	3.29478		3.70642
							-10.8569	4.2171		5.77943
							-11.3125	2.72357		3.6305
							-16.1377	4.64061		4.06131
							-10.0628	2.75423		3.71572
							-8.99766	5.44506		5.10488
							-13.2215	3.12001		2.98082
							14.706	3.58116		3.13828
							-17.4986	5.44362		3.27345
							-12.9231	5.28005		4.17698
							-8.02044	3.49132		5.40842
							-10.2966	2.51646		2.86581
							-7.32206	3.8915		3.38945
							-12.1372	3.1423		3.19396
							-15.6746	5.20198		2.90595
							-16.5346	4.87321		5.44303
							-12.4988	2.77886		4.00558
							-16.7353	4.58808		4.65499
							-12.8027	5.39499		3.2712
							-9.2222	5.14917		3.13089
							13.9323	4.58726		5.13381
							-12.1044	2.86048		2.84921
							-8.36589	3.43918		4.37196
							20.6224	3.857		4.88795
							-17.1574	2.88509		3.85374
							-7.3948	4.82283		2.50815
							-9.62126	4.33189		5.2488
							-10.0714	5.29317		5.0105
							-13.0249	3.15883		2.48293
							14.7353	2.72532		3.30318
							-11.2026	3.24337		4.1602
							-11.481	4.64792		2.61139
							15.1349	5.21133		2.69974
							-9.80231	3.51835		2.47248
							13.0701	4.83106		4.87623
							-7.24217	5.28304		3.59527
							-9.41373	3.07504		2.80748
							-10.3405	3.74532		3.02126
							19.3725	5.23288		5.13342
							18.358	2.5434		4.5607
							15.5383	5.0323		5.09531
							-7.25173	4.40701		4.01764
							-12.7845	4.69471		2.40457
							-10.533	3.19207		2.09742
							-10.8554	4.08144		1.97298
							-11.6686	3.8017		2.15752
							-8.7591	3.43766		2.78331
							-16.1404	5.11268		5.14381
							-7.79583	2.94229		3.12941
							-8.73554	4.00009		4.49961
							13.7025	2.55928		5.07866
							11.4838	5.1166		2.45593
							-9.16167	4.79122		2.9525
							15.6299	4.77221		2.07918
							-7.39994	2.7703		4.90519
							-12.1312	4.50394		3.58277
							-9.89466	5.1413		3.97095
							-8.22786	5.11633		5.13241
							-16.3013	3.85539		1.7737
							10.949	5.09076		4.36045
							-7.68431	4.92142		2.04915
							-12.3602	3.20973		2.74647
							-7.10734	4.20087		1.51897
							-9.71771	3.96638		5.20011
							12.9745	3.53464		1.68724
							13.9397	3.64471		3.04563
							12.0516	4.24004		4.79929
							11.6466	3.72654		3.92543
							-10.232	5.01684		2.46441
							-17.3796	3.00904		2.31456
							14.2702	5.01906		3.55635
							20.4346	2.61278		1.52288
							-16.7417	4.87032		4.48008
							-12.3692	4.94845		5.19752
							-9.52482	4.90947		1.31184
							-6.80023	5.00973		1.62314
							-9.23613	4.98202		5.03259
							-11.6944	4.93222		1.21748
							14.6086	4.87652		2.14886
							18.0445	4.83411		4.02631
							10.3774	4.83789		2.64808
							-8.10647	4.71429		3.2252
							18.9689	4.6602		4.90375
							15.5025	4.56262		1.05539
							12.2228	4.60166		1.81874
							-7.03021	4.53095		3.84714
							-8.5044	4.46556		2.28447
							-6.70305	4.4394		4.67833
							-10.7695	4.37139		1.11264
							9.62147	4.35021		2.97929
							-12.1258	4.27289		3.48766
							-9.18406	4.21258		4.25071
							14.7865	4.17953		1.32225
							10.6221	4.1206		3.82732
							-6.68176	4.03715		1.69978
							-6.75641	4.08622		3.32639
							-6.70969	4.07875		2.25768
							-8.53587	3.72789		2.78899
							-10.2353	4.06804		-1.38565
							-8.08406	3.38857		1.49126
							16.9958	4.04559		-1.20854
							-11.7967	3.18305		1.67104
							12.8944	3.99918		1.20026
							-11.0535	3.00564		1.89634
							-7.51606	3.84687		1.27823
							-11.9168	2.8601		1.27855
							16.097	2.80529		1.37392
							9.60076	2.72084		1.97522
							-8.39929	3.69991		1.67839
							-11.4828	2.78604		1.71756
							-6.73924	4.85673		1.35121
							13.5423	3.02398		1.9863
							18.5774	4.82074		1.86486
							-9.77424	4.07484		2.22852
							10.9566	4.46348		1.51555
							-9.35588	3.49414		1.70797
							14.7639	3.92995		1.67991
							-11.6658	4.29119		2.10104
							9.78958	3.94372		1.30774
							-8.7521	3.16737		3.09859
							17.941	4.5037		2.31591
							-8.50591	4.62839		2.10342
							8.85177	4.19946		3.97964
							19.8635	4.80064		2.6787
							11.5378	4.73421		0.998776
							10.4396	4.1285		2.06131
							11.1711	2.89084		2.42817
							-11.0479	4.29098		2.32488
							-7.52542	4.73416		2.27341
							-7.05176	4.7575		3.56378
							15.2762	2.87555		2.10614
							12.0141	4.45843		2.47726
							12.7498	3.00966		4.61499
							16.404	4.82456		1.86527
							17.4446	3.34477		2.417
							-11.5436	4.40759		2.77319
							-6.94832	3.71746		3.35629
							13.6756	4.12458		1.1178
							-10.3953	4.01904		5.0766
							-8.96363	4.59628		2.8689
							-6.44761	4.23985		2.55299
							15.9511	2.95692		4.36393
							-6.45076	4.55561		2.72717
							-11.0673	3.45257		2.54452
							12.0091	4.24844		2.82558
							-7.61649	4.63538		4.84836
							13.9054	4.81625		4.0735
							-7.41157	4.33173		2.59773
							-9.74715	4.36183		5.3781
							-6.10209	4.71931		2.74475
							-8.15746	4.26166		2.42183
							15.4192	3.0192		1.90235
							14.5899	3.12449		1.28216
							-6.53039	4.78634		3.00908
							-11.1588	3.70333		3.6868
							16.6356	3.83225		5.29156
							8.97484	4.12264		4.62709
							9.54943	4.57034		5.68248
							-8.48041	3.29104		3.0279
							17.9329	3.10846		3.14114
							10.2827	4.73892		3.39174
							8.58277	4.04659		5.15636
							-11.2247	4.67286		2.85726
							17.0388	3.64989		3.25501
							-6.93138	4.33371		3.22056
							12.6131	4.84919		4.26861
							-6.2033	4.84733		3.21029
							-10.8861	3.12298		1.41449
							-11.1641	3.40136		5.57919
							9.80603	3.10459		5.94544
							-9.96617	4.45031		2.32648
							-6.3653	4.1913		3.98095
							-9.04384	4.50434		5.4419
							19.0971	3.22653		4.79118
							-10.3337	4.30494		3.48689
							7.68577	4.75306		5.84546
							13.0311	4.17126		3.44911
							11.0119	4.79719		3.43251
							13.5921	4.31946		5.19032
							-6.00197	4.67322		4.41513
							10.1974	3.21319		6.24721
							10.4752	3.20045		1.60808
							-6.9239	3.64584		3.4748
							7.22935	3.27334		3.65699
							-6.15583	4.82159		1.89823
							-6.65133	3.88509		6.07938
							-10.783	2.96528		4.71788
							-10.5991	4.2178		3.53001
							8.66743	3.2257		3.14512
							-6.11464	4.82392		2.47156
							7.82479	3.05291		5.73131
							-9.5202	4.34333		4.13063
							17.2423	4.49965		4.38572
							-7.39299	3.06981		3.77753
							8.12182	4.60983		6.39358
							14.3571	3.15266		3.90174
							-6.8648	3.26305		1.78523
							15.5917	4.31768		6.03865
							8.87395	4.29998		6.22506
							-5.57865	3.27228		5.3326
							-6.07149	4.62268		2.0342
							8.17846	3.29591		4.30727
							-10.8922	4.79058		5.65982
							11.4672	3.96691		3.21568
							12.118	4.67886		5.94137
							13.7595	2.96224		3.92973
							-8.3934	4.74336		5.0417
							-5.55649	4.22635		6.44114
							10.6237	4.22557		4.74422
							10.145	3.2012		3.77061
							-6.26697	3.59924		1.87158
							-7.59594	3.31758		4.10764
							-8.8742	3.32952		2.81338
							-10.1486	4.22139		2.08683
							-10.5363	4.73041		4.17037
							9.17282	4.37285		6.32261
							-10.0982	2.90551		4.53164
							14.5855	4.68784		6.45799
							17.8355	4.12671		6.07051
							-10.5624	3.31525		6.23514
							15.8899	2.98636		1.88568
							9.43535	3.29601		4.93999
							-7.81284	4.19789		4.56076
							7.46741	4.21073		5.25542
							-9.56757	4.11839		5.55321
							-5.97953	4.55251		3.68036
							12.5609	3.76013		2.47165
							-5.52236	3.18994		4.37413
							16.3718	4.76023		4.82857
							-6.32091	4.5157		2.14624
							11.1971	2.93119		4.31877
							8.43051	3.28522		6.45112
							7.12129	4.69587		6.52098
							-5.82401	4.72518		5.00751
							-10.5062	2.75149		6.458
							6.59165	3.35151		4.69309
							13.6032	4.15284		3.23434
							-10.1372	4.75657		2.41042
							6.89137	4.09012		6.60424
							6.43627	4.05887		6.08219
							-9.01632	4.31761		5.1417
							14.675	4.56934		5.35311
							-6.7463	3.04678		6.46827
							-9.99086	4.59854		4.97593
							-5.92295	2.82622		5.70476
							10.1611	3.05724		6.54354
							7.38093	4.70113		4.30057
							6.53687	4.821		2.13419
							-9.58404	4.12446		6.00407
							7.68217	3.36285		6.59817
							-5.52555	4.72189		2.37734
							-8.04017	3.50891		6.71235
							-5.03324	3.25333		6.52506
							-10.2348	2.83589		4.86325
							-5.52204	4.49861		4.67017
							6.97212	4.19888		2.94147
							-10.3465	4.02908		5.58422
							10.3194	4.36221		5.63539
							8.96496	3.95973		6.47931
							15.3539	3.36977		6.71605
							12.7895	4.77564		6.94898
							16.8633	4.08479		5.22377
							-9.31379	4.78106		5.94469
							-9.70496	4.35608		6.67591
							7.94753	3.24468		4.09272
							9.25328	3.17066		6.6821
							6.66687	4.58501		2.70163
							-8.44584	4.13658		3.56046
							13.3825	2.90544		6.26439
							-4.96342	3.531		7.07888
							-9.43906	3.82259		4.71901
							14.6719	3.89724		2.52812
							8.11421	4.41514		6.93827
							10.864	3.46912		5.63792
							-10.152	4.14976		5.10483
							6.97632	4.69635		7.17045
							6.05744	4.77276		2.25846
							6.34046	3.8246		5.95584
							-9.79227	3.19967		6.87753
							-4.75856	4.73346		7.17772
							7.41841	4.5165		7.12654
							-5.02277	4.40463		6.70142
							13.8677	4.00455		6.28207
							-5.80041	3.29894		3.04199
							5.84847	3.92163		6.94806
							-5.41323	4.25956		5.51506
							7.70337	3.00044		6.75021
							-9.91068	4.54527		6.89995
							15.516	3.52499		3.9486
							-8.71764	3.81723		4.91283
							6.64616	3.06132		5.85601
							-5.29986	3.71633		5.17726
							6.25239	4.75432		6.09677
							-5.02069	4.21746		7.36825
							8.94761	3.58786		6.77069
							7.23251	3.75979		4.5903
							5.40818	4.63278		2.6308
							9.41048	3.93921		3.57568
							6.39267	4.70693		6.42502
							-5.12754	4.39103		7.50756
							-9.14576	3.38544		7.64761
							5.89502	3.43765		7.48713
							7.78945	3.17406		7.25086
							11.5642	3.8286		2.37368
							-9.51865	4.14122		6.82631
							8.30502	4.48524		7.06132
							-4.35314	3.71726		7.08968
							6.66389	3.77004		3.23861
							14.5393	3.75822		7.52756
							12.5581	4.09668		5.00183
							-9.77236	4.69156		6.92201
							6.05154	3.33319		6.49753
							-7.56887	4.60733		7.41799
							6.45437	3.95378		4.24342
							13.1086	4.34929		5.42409
							16.0313	4.52946		4.76621
							-9.89438	3.85137		7.80147
							-7.99404	4.34459		7.94426
							5.90065	4.62496		7.63777
							-8.50243	3.82362		6.8456
							-4.8987	3.86398		6.09377
							4.08511	3.57697		7.89615
							5.36813	3.94231		2.91166
							5.40086	4.52428		7.12835
							6.58697	3.93098		6.99857
							13.6265	4.05465		8.09404
							9.41255	3.78325		7.79868
							7.64274	4.34236		7.38491
							10.5598	4.03918		3.35013
							-4.55107	3.49009		2.45209
							-8.7415	4.44195		5.08237
							8.51825	4.50729		6.89728
							6.10494	4.0075		7.73542
							-4.39821	4.31814		7.18518
							-9.43138	4.52429		3.81706
							-8.13008	4.02734		7.69237
							9.86203	3.85901		8.09467
							-9.30116	3.79493		4.85333
							5.05323	3.75088		8.44476
							7.9226	3.78094		8.12942
							5.77375	4.1657		8.40865
							6.48931	4.11414		6.84538
							-8.60905	3.78734		6.37448
							-9.59866	4.48479		7.77647
							-4.53358	4.17841		7.01962
							5.33747	4.00661		8.37232
							-8.97714	3.64057		7.54742
							-3.80807	4.37113		3.05956
							-4.68981	4.35243		5.97906
							-9.57087	3.83724		7.4624
							6.40615	4.36308		4.43374
							14.0415	4.22419		8.20941
							5.46123	3.63454		5.28621
							6.89106	4.20805		2.46428
							5.36112	3.62305		8.14825
							5.96244	4.16245		7.35157
							6.80464	3.74402		7.32238
							11.5665	4.1342		5.73132
							10.6773	3.68509		8.73238
							-4.37264	4.2699		7.19602
							-8.78679	3.9507		7.9002
							4.49153	4.2516		7.66342
							5.0261	3.60514		6.64937
							6.35325	3.84046		7.97614
							-7.41386	4.12975		8.59142
							5.16949	3.80273		8.74567
							14.7389	4.487		8.29061
							12.5235	4.24819		8.7292
							7.61802	3.48363		7.09236
							-9.48897	4.39401		2.75598
							-7.65494	4.17084		8.21938
							-3.92727	3.59921		4.97818
							4.99883	3.93963		3.31631
							-8.94244	3.92036		7.53879
							8.3346	4.11987		8.47581
							7.0487	3.97508		8.6882
							4.66186	3.41965		5.57363
							-9.18977	4.10911		4.03316
							-4.09773	3.95973		7.40728
							-9.17126	3.63229		7.70396
							8.80007	4.3263		2.47421
							6.36678	3.4349		7.82432
							3.47946	3.30063		6.24523
							6.84257	4.07304		8.93143
							-7.61653	4.00317		8.16013
							4.79945	4.57206		8.20946
							4.53405	4.00121		8.44237
							-4.06357	3.43796		7.01946
							4.25913	4.18616		4.55462
							5.3141	4.06615		8.66706
							5.0495	3.583		8.9099
							-9.22782	3.07911		7.6471
							-7.74746	3.12465		8.1748
							12.8447	4.82155		8.97246
							-3.95003	3.28093		8.82966
							4.63931	4.45394		8.03221
							5.36514	3.96454		8.01278
							-9.18119	4.02984		7.56034
							4.72617	4.63345		4.9292
							-3.81677	3.67515		2.95436
							8.99543	3.15844		5.3875
							10.5269	4.13732		9.16782
							5.9557	2.85862		5.92863
							5.64314	3.00245		-2.49141
							9.42577	3.33173		7.19826
							6.78623	2.79909		8.61925
							-8.62127	3.79314		4.01119
							-8.12004	4.38828		8.01895
							4.44755	4.88437		8.89498
							11.3656	4.65527		3.47974
							6.11989	3.02924		8.7253
							-7.99343	3.87424		8.37227
							3.37242	3.99191		7.86196
							7.33293	2.83787		7.95986
							9.79931	3.39517		6.43257
							4.29332	4.65251		4.39048
							-3.76183	4.03886		9.20351
							13.5191	4.81432		8.59911
							3.76373	3.00271		9.11687
							6.85337	2.48696		9.23418
							-9.10576	3.59459		5.08993
							4.09991	4.12982		8.96345
							6.12235	4.72373		7.64961
							-3.61119	2.59152		5.54335
							3.93315	4.38295		8.54735
							-3.59791	3.80851		8.06533
							3.14117	2.37725		8.7151
							-8.5005	2.49551		3.91107
							7.88582	4.56165		8.34298
							4.32429	3.18158		8.33749
							-8.77131	4.87893		9.06661
							6.1987	2.59716		-2.53518
							11.4599	3.84853		7.10033
							5.45736	4.05766		2.88854
							-3.36077	4.92157		5.89698
							8.4913	4.30081		9.1988
							10.2872	3.53809		6.51567
							4.57473	2.1897		9.28131
							-3.27293	4.85444		9.28886
							6.94624	2.59496		8.92189
							3.86494	2.0581		8.62716
							5.41084	4.58448		8.16865
							-8.3026	3.85263		4.50682
							3.5419	2.14107		5.18405
							5.07664	2.87925		8.8863
							3.99965	2.29469		8.46653
							6.50404	4.90723		8.01176
							3.41967	3.99019		8.858
							4.07568	1.9029		8.53577
							7.76291	4.40023		9.20476
							7.09465	3.65038		9.0481
							7.13331	3.06509		9.27535
							4.7312	4.12066		7.35556
							-8.6257	4.98522		3.56976
							10.6242	2.05288		8.69562
							-8.00453	1.83101		9.14577
							5.69024	3.31296		6.76658
							9.42457	3.75949		8.60213
							5.4368	4.51676		8.38412
							4.58738	4.9169		8.15962
							-3.28666	4.85126		-2.58826
							3.70642	2.426		6.24909
							-7.12328	4.22925		4.00092
							8.60103	3.42886		8.30179
							6.23166	1.65713		5.31863
							-3.20567	3.79112		9.10352
							6.06926	4.54562		3.16898
							11.6707	4.04467		8.79901
							-8.69525	2.68974		9.09458
							12.2611	1.59182		8.68318
							7.11536	1.97561		8.93381
							5.8041	4.99069		8.71753
							5.77943	2.9885		4.53213
							6.4769	4.89735		8.40315
							-7.454	4.16896		7.13899
							-2.89881	3.21682		8.02752
							-8.41006	4.73984		8.81734
							3.6305	3.8702		8.88572
							6.49193	1.58372		8.7036
							4.06131	3.39012		8.63967
							5.25774	4.78482		8.51114
							-3.05255	1.47232		7.75676
							3.08582	4.36521		6.63574
							7.27172	4.14375		6.04262
							3.71572	2.96439		8.27904
							5.10488	2.03026		8.52372
							2.98082	3.52007		-2.64772
							7.70734	2.62927		5.56091
							6.6096	3.95606		8.12735
							3.13828	4.57616		2.94555
							3.27345	4.45179		8.54936
							7.7618	1.7062		7.81114
							-2.70793	3.71269		4.16287
							-2.81838	3.1017		4.75562
							4.17698	4.14467		7.20488
							3.80946	1.39362		8.00446
							5.40842	3.85072		8.31804
							10.5594	2.29536		8.35012
							7.99752	3.8925		3.51007
							2.86581	2.77718		8.33547
							3.38945	4.17627		8.05849
							-8.38036	4.13698		5.14455
							3.19396	3.2735		8.21869
							2.90595	3.59169		8.06877
							6.46024	1.80863		7.56354
							5.67971	3.63781		8.09482
							4.43825	3.73917		6.26688
							7.93083	3.37758		7.48385
							5.44303	1.46101		5.62004
							4.00558	3.68237		7.98406
							6.91681	3.75495		7.63026
							9.21895	2.51672		3.82434
							4.65499	2.84658		6.89165
							5.9411	3.13047		7.42812
							7.59549	3.42945		7.76391
							8.28048	2.1335		4.35272
							8.39894	3.60227		7.6957
							5.51461	3.38627		2.98481
							3.2712	3.31665		7.13639
							8.1129	3.28597		7.65436
							6.91111	1.69749		7.47892
							3.13089	3.24137		-2.75471
							5.34637	3.16179		4.91876
							5.13381	2.94032		7.06416
							-2.73832	3.04983		7.36283
							-8.26476	3.16354		7.30932
							5.48277	3.12472		7.13722
							11.0402	3.09651		7.07411
							2.84921	2.71774		6.30761
							4.37196	2.94958		6.92221
							4.37578	2.38307		5.76115
							-2.74063	2.03609		6.56691
							5.93683	3.08072		3.66346
							9.62507	2.98782		5.04713
							-2.64185	2.89084		3.21015
							6.44469	2.78801		6.90187
							7.33249	2.77859		6.58311
							5.99173	2.63376		6.54659
							4.88795	2.67612		6.69396
							3.85374	2.40671		6.65758
							2.50815	2.98649		4.48831
							2.52268	2.5467		6.03887
							2.96352	2.86762		6.55874
							10.0456	2.53636		5.477
							7.10671	2.68722		3.99486
							4.63567	2.88523		-2.90989
							5.2488	2.74924		6.09357
							5.0105	2.97456		6.28951
							5.7863	2.50613		5.01461
							7.85226	2.3803		6.1918
							-2.48817	2.3344		6.06351
							2.48293	2.37745		3.39713
							5.50155	2.92826		5.85998
							3.70459	2.98825		5.66989
							3.30318	2.75143		5.2686
							7.14554	3.07466		5.49616
							6.29803	-2.24733		5.75504
							5.32612	3.15704		3.67313
							4.1602	2.58974		4.50732
							6.07959	2.9532		5.54277
							2.61139	-2.35329		5.46843
							5.30371	3.2738		4.02785
							2.69974	2.95053		4.76802
							2.47248	-2.29797		5.06212
							8.08942	3.30233		5.27016
							4.87623	-2.68294		-3.06639
							3.59527	3.32171		5.03523
							2.80748	-2.54831		3.35575
							3.02126	3.37099		5.06083
							7.3113	-3.03517		4.74879
							5.29126	-3.00769		3.58785
							7.86097	-3.45346		4.20062
							8.01715	-3.62861		4.75395
							4.66193			4.91161
							7.44338			4.38842
							-2.37341			4.72605
							8.92212			4.50946
							6.57776			4.64391
							7.07528			-3.29535
							-2.27627			3.82274
							-2.4282			4.04703
							6.55354			4.52062
							5.14023			4.17873
							5.35318			4.30216
							5.13342			3.53536
							4.5607			4.13039
							5.98685			3.75945
							4.92358			3.9448
							7.81731
							5.66662
							9.80468
							7.86525
							5.09531
							5.26909
							5.17851
							-2.3083
							4.01764
							6.13107
							4.43249
							2.55526
							2.40457
							2.09742
							1.97298
							5.16115
							7.16764
							3.26161
							2.08959
							2.15752
							7.4111
							7.79441
							6.59138
							-2.18237
							5.09471
							2.78331
							5.14381
							3.12941
							7.87808
							4.49961
							7.24853
							5.07866
							7.46983
							2.45593
							7.52246
							6.01645
							2.9525
							3.85272
							6.40393
							2.07918
							5.27956
							5.9308
							4.05314
							-2.19711
							6.84418
							5.15612
							4.65056
							5.24096
							4.90519
							5.39347
							8.30086
							4.83281
							1.97834
							3.58277
							5.0952
							4.94557
							7.54235
							-1.91415
							7.53927
							-2.12701
							8.75647
							2.00353
							4.92495
							3.97095
							5.13241
							3.14239
							1.7737
							5.48073
							4.36045
							6.41802
							7.05132
							2.04915
							2.74647
							4.81668
							6.71409
							5.10886
							4.90554
							2.14997
							6.24918
							1.73895
							4.7827
							7.59739
							5.46124
							1.51897
							6.18169
							3.78271
							5.20011
							3.56707
							7.06027
							-2.05716
							1.68724
							-1.7699
							4.52233
							4.67446
							5.2691
							3.04563
							4.79929
							7.31638
							4.97077
							3.92543
							6.50082
							2.46441
							2.31456
							4.91237
							4.55855
							6.75639
							3.55635
							5.53876
							-1.60406
							4.96532
							4.45242
							5.45901
							-1.98714
							6.93649
							5.169
							1.52288
							8.17383
							-1.73122
							7.22839
							2.94164
							4.01349
							4.2754
							4.37697
							4.48008
							7.26567
							5.19752
							3.96923
							6.13099
							2.26017
							5.51986
							4.97996
							6.50489
							5.28502
							4.57255
							5.72991
							4.38341
							4.82495
							7.00082
							4.47541
							4.79786
							-1.64841
							3.1446
							1.31184
							1.62314
							5.64184
							3.40784
							-1.57344
							5.03259
							6.56558
							1.21748
							1.44924
							4.35245
							4.33531
							2.14886
							-1.92553
							5.43044
							3.98098
							6.74447
							1.81545
							4.02631
							7.80934
							2.91783
							2.64808
							6.93347
							-1.41747
							3.2252
							6.80707
							5.32902
							3.86601
							-1.84295
							3.37584
							1.28385
							4.42481
							5.53159
							1.82732
							5.1535
							4.80764
							4.90375
							6.1056
							5.03943
							4.88582
							6.5459
							3.73844
							3.71467
							3.79075
							1.05539
							4.93938
							5.5307
							5.53405
							3.26701
							3.89774
							4.52979
							1.81874
							2.82747
							3.84714
							5.57967
							1.35754
							2.28447
							-1.90558
							4.07534
							4.67833
							3.9359
							1.8984
							6.1155
							6.39576
							3.997
							6.92268
							1.11264
							7.49185
							3.98892
							1.77096
							5.79682
							2.97929
							6.2582
							5.54074
							5.27264
							5.44492
							1.87543
							2.87681
							5.71419
							4.41005
							2.64892
							6.56511
							1.15687
							-1.47905
							5.15829
							5.20007
							3.48766
							6.5749
							4.25071
							3.11368
							3.61121
							5.78932
							1.32225
							6.45366
							4.28815
							4.58614
							4.73204
							5.59746
							4.52723
							3.32417
							5.31909
							3.6249
							4.92999
							6.20254
							4.63991
							-1.75843
							2.57446
							3.82732
							0.93878
							1.69978
							5.7291
							6.27158
							5.24841
							3.44881
							3.87489
							4.23456
							-1.42287
							-1.87948
							-1.50385
							7.25924
							3.32639
							2.25768
							6.38977
							4.04571
							2.6786
							1.09199
							2.78899
							5.52535
							6.15315
							5.78959
							1.99556
							5.86942
							5.16621
							5.16698
							2.11201
							0.778331
							3.87676
							3.4929
							5.13876
							0.909956
							5.84949
							3.62553
							4.72889
							6.26477
							6.20546
							3.51736
							5.46821
							4.45834
							-1.39156
							4.21989
							2.81428
							3.26988
							3.72907
							-1.77591
							4.52727
							2.23185
							5.89732
							2.96387
							6.03227
							5.4136
							5.57993
							3.66467
							4.22373
							3.60268
							2.44302
							1.50126
							5.19627
							5.75349
							3.62707
							6.18262
							2.60912
							1.02848
							5.90259
							7.19235
							3.2567
							3.8046
							4.14422
							-1.77874
							4.12796
							0.896362
							5.05886
							0.7748
							5.9142
							-1.71433
							1.00188
							4.46952
							4.00297
							5.28338
							1.92763
							3.86118
							-1.83473
							3.74599
							3.3034
							4.7675
							2.37058
							2.41521
							5.62418
							5.65426
							5.8716
							3.28537
							0.82943
							1.98023
							5.51071
							4.59885
							-1.29388
							2.82245
							3.30652
							3.48322
							5.99402
							5.53886
							4.81151
							0.966459
							0.90232
							3.00124
							3.94499
							4.0559
							4.75108
							5.86442
							5.96841
							5.06283
							4.36628
							1.72142
							5.09636
							4.19779
							5.74886
							3.41056
							3.39492
							4.6053
							-1.44559
							2.39374
							-1.42274
							7.36232
							-1.55499
							6.73447
							2.73136
							5.8688
							-2.23316
							3.71484
							3.09071
							1.70076
							5.01493
							1.11608
							4.89219
							2.10667
							5.37006
							3.14877
							3.8641
							3.53492
							2.65385
							2.52521
							3.34371
							4.34668
							5.69027
							3.45267
							0.877639
							0.871248
							3.32804
							4.64239
							-1.0757
							1.58509
							4.48492
							5.05159
							3.89203
							5.50912
							5.19214
							1.51957
							4.72916
							5.73297
							3.88278
							3.81505
							5.31854
							5.54785
							4.0912
							4.43027
							3.66777
							5.58177
							3.01591
							5.70031
							5.8132
							-1.40333
							5.72078
							-1.35697
							3.18821
							4.29306
							4.60929
							3.04436
							4.02687
							7.54303
							2.45768
							5.67439
							0.920438
							3.17315
							4.36316
							3.77197
							1.17848
							0.900114
							3.46553
							2.54806
							3.12735
							1.53605
							3.77998
							4.758
							2.6853
							4.23001
							-1.28378
							1.78688
							2.91463
							2.94128
							4.57885
							1.51871
							4.29839
							3.36468
							3.76498
							3.45834
							3.40911
							4.9315
							2.17685
							5.55583
							5.47773
							3.08658
							2.52372
							3.82346
							2.4917
							4.36263
							2.95718
							4.94341
							2.13377
							4.21226
							6.64242
							1.03932
							4.85389
							5.17384
							3.00577
							4.07842
							3.58179
							2.97036
							5.31782
							5.59992
							4.18639
							4.78026
							5.7359
							1.66777
							1.26386
							3.93115
							3.82472
							1.16081
							4.41478
							5.46016
							5.22072
							3.31136
							1.39758
							1.50882
							3.43726
							5.72901
							3.99344
							5.73089
							4.04051
							2.7613
							2.60553
							7.77629
							1.87303
							3.28492
							3.02523
							4.50969
							2.04277
							2.81495
							4.75558
							2.52059
							4.40921
							3.55792
							3.81847
							4.53567
							3.59879
							1.23455
							4.30293
							2.60081
							2.95113
							5.5725
							5.24155
							4.44457
							1.37486
							1.47476
							3.69874
							3.71031
							4.522
							4.11631
							2.797
							3.20622
							2.54023
							2.42768
							4.81182
							2.49244
							1.64667
							5.27602
							3.02268
							3.85692
							5.43969
							3.5569
							1.5002
							3.48717
							2.2896
							1.89198
							4.87285
							5.18903
							4.94206
							2.39986
							5.62864
							4.1706
							4.92014
							6.53426
							2.7322
							7.39001
							3.29478
							4.2171
							2.72357
							4.24414
							1.77148
							4.64061
							4.30125
							1.91508
							5.61278
							2.75423
							5.44506
							2.78478
							1.67139
							1.66341
							7.93931
							3.12001
							3.00438
							4.70979
							3.63251
							2.88063
							3.04801
							3.58116
							3.89443
							3.91372
							3.88855
							5.42098
							2.62638
							5.44362
							2.87772
							5.03764
							2.16525
							1.83242
							2.47439
							5.17458
							2.73943
							5.28005
							2.87072
							3.49132
							2.69845
							1.89487
							2.1034
							2.51646
							4.21073
							3.8915
							2.43499
							3.1423
							2.55698
							3.70265
							5.20198
							4.87321
							2.77886
							4.58808
							5.39499
							-3.27883
							5.14917
							4.58726
							2.86048
							4.73188
							3.46553
							3.52408
							2.14178
							5.55526
							2.11517
							6.25934
							1.91521
							3.43918
							4.50879
							3.857
							4.91387
							4.20353
							2.38603
							4.65207
							2.45415
							2.88509
							3.09881
							4.31313
							4.82283
							2.98116
							2.98
							2.9155
							2.4065
							3.24032
							2.3285
							6.98311
							4.33189
							5.29317
							8.05817
							3.29464
							2.06225
							5.59336
							2.13682
							2.24424
							2.36119
							4.35331
							3.15883
							3.00923
							5.11187
							4.99295
							2.37716
							2.72532
							3.24337
							4.64792
							5.21133
							3.51835
							3.08793
							3.38537
							4.83106
							2.32287
							5.28304
							3.33205
							3.97244
							3.07504
							3.5673
							1.9891
							3.3
							3.74532
							5.23288
							2.5434
							2.1328
							4.93557
							5.0323
							4.29831
							4.40701
							4.69471
							4.1813
							3.00213
							2.36301
							6.66412
							3.19207
							4.44496
							4.08144
							3.87213
							4.57035
							3.21978
							4.68561
							3.8017
							3.43766
							2.16778
							4.99905
							-2.13029
							5.11268
							1.81336
							2.28476
							3.62081
							2.94229
							3.17336
							2.46431
							4.00009
							7.38345
							2.21236
							4.58443
							2.2736
							3.55671
							4.75138
							2.42527
							3.26924
							-3.04965
							2.55928
							5.1166
							7.93239
							3.9546
							4.79122
							4.77221
							5.55114
							2.7703
							3.57627
							4.48123
							4.50394
							5.1413
							1.92883
							3.42576
							7.41587
							5.11633
							3.85539
							4.50012
							3.33062
							4.37948
							2.93441
							5.09076
							2.35458
							3.21171
							4.92142
							3.20973
							4.20087
							2.40886
							3.60339
							1.63367
							2.37049
							3.15437
							3.96638
							3.53464
							2.33484
							3.88598
							4.42427
							-2.93216
							7.13514
							3.64471
							4.24004
							3.72654
							5.01684
							2.14098
							4.28791
							1.48738
							3.89901
							3.00904
							5.01906
							3.92628
							4.0685
							2.90391
							6.23894
							2.61278
							3.2083
							1.60244
							1.65619
							-1.59645
							-1.6748
							1.73825
							1.91074
							-1.84974
							-1.95121
							2.39294
							2.46659
							2.62096
							2.83059
							-2.17894
							2.99772
							-2.23681
							4.87032
							4.94845
							4.90947
							5.00973
							4.98202
							3.22395
							4.93222
							4.87652
							4.83411
							4.83789
							4.71429
							4.6602
							4.56262
							4.60166
							-2.40851
							4.53095
							3.62688
							4.46556
							4.4394
							4.37139
							-3.81634
							3.88254
							3.82515
							4.35021
							2.47151
							4.27289
							3.88813
							4.21258
							4.17953
							3.95811
							3.96887
							4.1206
							3.47322
							4.03715
							3.74542
							2.48844
							3.80961
							4.08622
							3.67851
							4.07875
							3.54679
							3.5753
							3.72789
							3.62091
							4.06804
							3.38857
							2.42924
							3.45236
							4.04559
							3.18305
							3.99918
							2.40383
							3.47778
							3.00564
							2.40526
							3.84687
							2.3705
							2.8601
							2.80529
							2.72084
							2.46108
							2.47424
							2.60432
							2.57752
							2.5464
							3.69991
							3.2393
							2.74266
							2.65418
							2.90384
							3.06459
							3.58298
							3.84663
							2.75138
							-1.64882
							-2.38337
							3.78969
							-1.30477
							-2.02528
							3.52282
							3.60731
							3.78551
							3.80653
							3.01827
							3.09489
							3.71907
							4.45425
							4.89961
							5.1229
							5.69118
							5.99109
							6.51339
							6.72496
							6.9081
							7.25429
							7.41971
							7.6385
							3.1065
							2.78604
							6.22705
							2.79
							3.58352
							3.90866
							4.85673
							3.02398
							3.40283
							-1.89738
							3.51564
							1.94782
							4.82074
							4.07484
							4.46348
							3.49414
							6.91838
							-1.65899
							-4.5143
							3.62988
							2.51879
							3.92995
							4.29119
							3.69453
							-2.54192
							-2.14389
							4.09184
							2.69396
							3.94372
							3.16737
							4.5037
							2.71971
							2.58463
							4.62839
							-2.44057
							2.75272
							3.8
							4.45834
							4.19946
							4.80064
							6.97481
							4.16001
							-2.32389
							4.73421
							4.1285
							3.06967
							3.22057
							2.89084
							5.46423
							4.29098
							4.73416
							3.11788
							7.28248
							4.7575
							2.87555
							1.84138
							3.25298
							2.85567
							-6.30823
							3.36051
							-2.52835
							-7.48366
							2.61844
							6.80203
							4.45843
							-2.21789
							3.61824
							3.00966
							3.66311
							2.71401
							-2.33025
							4.82456
							-0.405785
							-7.07674
							2.57673
							3.34477
							4.40759
							-6.84348
							4.54692
							-5.74838
							3.37401
							3.71746
							-3.12282
							4.12458
							6.63798
							2.6612
							2.48811
							3.03955
							4.01904
							4.59628
							3.90984
							4.23985
							5.02931
							-2.55492
							2.95692
							4.55561
							3.45257
							3.16781
							-2.50684
							-4.05002
							4.24844
							4.25455
							2.36923
							4.63538
							2.76759
							4.81625
							4.74839
							3.41583
							4.33173
							4.36183
							4.71931
							4.26166
							3.0192
							-2.66382
							-7.20167
							-7.51613
							2.79192
							3.12449
							-3.45556
							-2.65221
							2.67433
							2.66362
							-7.93189
							2.56996
							3.38337
							6.79888
							4.78634
							3.70333
							6.26508
							-2.61925
							5.69801
							0.7854
							4.31286
							2.95395
							-2.58451
							3.83225
							3.66157
							3.8715
							4.12264
							-2.66678
							-9.09609
							2.69547
[truncated: 1,603 more rows]

## Sheet: Blad8
	mean	std	95low	95up	surface		face	forehead	nose	cheeks	upper lip	chin
face	-3.38593	3.15048	-7.3335	3.56457	13724		-4.92967	-4.04323	-2.42595	-5.14587	-4.25725	-6.72084
forehead	-0.352341	3.25704	-3.89719	4.13426	3141		-4.89451	-3.88231	2.55494	-4.99782	-3.99749	-6.82944
nose	-1.95007	2.76869	-5.21645	2.84252	716		-4.92462	-3.8585	2.19675	-5.3617	-4.50128	-6.99005
cheeks	-5.00907	1.21136	-7.37559	-3.13533	3559		-5.03828	-3.69832	2.84171	-4.78462	-4.12388	-6.61333
upper lip	-5.21151	3.02336	-11.4685	-2.87425	558		-4.62849	-3.96626	1.96367	-5.43646	-4.5637	-6.48096
chin	-6.44888	0.64608	-7.49925	-5.37411	541		-5.06663	-3.71232	2.87925	-5.3658	-3.72584	-6.30749
							-4.65906	-3.92053	2.56815	-5.43532	-4.35624	-6.63309
							-4.83693	-3.64726	-1.59022	-5.24835	-4.40631	-6.1498
							-5.19694	-3.87324	-2.84667	-5.01801	-3.89617	-6.91764
							-5.15963	-3.61434	2.06191	-4.57387	-3.86909	-6.43157
							-4.52478	-3.84373	2.7472	-5.64089	-3.68337	-5.99694
							-4.97696	-3.84181	-1.19098	-5.56422	-3.33249	-6.20385
							-4.41295	-3.59997	-1.49054	-5.47184	-4.06447	-6.57115
							-4.56113	-3.82205	-3.15129	-5.44227	-3.51684	-5.81745
							-5.14467	-3.67531	2.27639	-5.57805	-4.03834	-6.83224
							-5.20488	-3.81165	-0.798907	-5.67531	-4.52659	-6.35189
							-5.20371	-3.58193	-3.29556	-5.28303	-3.3022	-6.09631
							-4.87849	-3.74259	-1.18234	-4.79087	-4.49861	-5.59181
							-5.09324	-3.77742	-2.95796	-5.6227	-3.6984	-6.28659
							-4.67252	-3.88242	-3.18448	-5.56119	-4.29399	-6.96964
							-4.66327	-3.71574	-2.67265	-4.57822	-3.61146	-6.80573
							-5.02126	-3.56893	-1.68112	-5.65026	2.42595	-6.57124
							-5.19376	-3.62955	-2.13945	-4.29276	-3.63511	-6.01398
							-5.20469	-3.53841	-0.613254	-5.58008	-4.19109	-5.51865
							-5.11701	-3.58914	-0.832083	-5.69705	-3.90554	-6.58004
							-4.21748	-3.65352	-3.37014	-5.50216	-3.73604	-6.27864
							-4.33139	-4.01358	-1.22617	-4.99984	-3.40881	-7.21774
							-5.1695	-3.70821	-2.8711	-5.57643	2.84171	-5.52408
							-4.36652	-3.60535	-3.27029	-5.55854	-4.40834	-5.97923
							-4.87894	-3.50897	-2.06409	-5.25477	-4.0513	-6.21542
							-5.25981	-3.58934	-0.990653	-4.7062	-2.84667	-7.05016
							-5.05068	-3.47058	-3.2016	-5.55138	-3.76636	-6.33034
							-5.14587	-3.54264	-2.66015	-5.60126	-3.56173	-6.15357
							-5.27957	-4.24956	-1.50821	-5.70705	-3.75235	-6.75162
							-4.99782	-3.40196	-1.01274	-5.50102	-3.63628	-7.45982
							-4.49937	-3.41277	-1.18199	-5.53309	-3.77407	-5.49085
							-5.3617	-3.36279	-3.44576	-4.53259	-3.15129	-6.29371
							-5.22383	-3.41614	-1.4407	-5.56015	-3.51968	-6.47114
							-4.20729	-3.41217	-2.63994	-5.45845	-3.78149	-6.01097
							-4.44046	-3.48977	-1.17598	-5.30667	-3.76736	-7.16739
							-4.01727	-3.39118	-2.04074	-5.47856	-3.6969	-7.49708
							-5.35063	-4.34024	-3.44092	-5.4586	-3.37014	-6.83939
							-4.78462	-3.96036	-3.25132	-4.23533	-3.24182	-7.65013
							-5.43646	-3.30863	-2.75391	-4.83224	-3.53615	-5.80695
							-4.09855	-3.58358	-1.52361	-5.59038	-2.88758	-5.54777
							-5.36951	-3.29833	-1.85196	-5.46837	-4.15671	-5.8351
							-4.25776	-3.31006	-1.41263	-5.50837	-3.08479	-6.26875
							-5.3658	-3.28214	-1.75188	-5.00485	-3.90533	-6.91302
							-3.96417	-3.27411	-1.53184	-5.48582	-2.63994	-5.57198
							-5.34773	-3.435	2.2795	-5.39977	-3.54767	-7.39738
							-5.00933	-3.34161	-2.60928	-5.54296	-2.86981	-7.83687
							-5.35657	-3.24033	2.74718	-5.39348	-5.3622	-5.53286
							-5.43532	-4.35569	-2.24332	-5.28245	-3.06943	-5.37449
							-5.24835	-3.08055	3.70405	-4.45328	-3.63207	-5.80059
							-5.38668	-3.10813	-3.06943	-5.07301	-3.8808	-6.07193
							-5.32965	-3.11162	-4.0743	-4.63867	-4.55672	-6.956
							-5.01801	-3.22643	-1.67078	-5.3045	-3.35515	-5.4087
							-4.57387	-3.89105	4.0425	-5.13491	-7.62249	-7.54873
							-3.97021	-3.04116	-1.79653	-5.43772	-3.7375	-5.36679
							-4.25605	-3.3113	-3.27461	-5.3427	-4.04452	-7.76341
							-5.64089	-3.39707	-2.25374	-5.27994	-3.77572	-6.28866
							-5.56422	-3.5508	-3.8442	-5.25221	-3.59881	-5.32665
							-5.37542	-3.20412	-2.04836	-5.09715	-11.4806	-7.5516
							-4.22998	-3.1318	-2.15452	-5.1514	10.1312	-5.85455
							-5.47184	-4.31231	2.62716	-5.44056	-11.3623	-7.26826
							-5.43242	-3.20042	2.84985	-4.86451	-8.48748	-5.30073
							-4.52865	-3.02978	-2.81636	-4.12857	-4.11526	-6.68755
							-3.9297	-2.87813	-1.95944	-5.21372	-4.01655	-5.38548
							-5.44227	-3.87455	2.5401	-5.02489	-3.85366	-5.36332
							-4.03593	-2.97037	-3.38544	-5.11618	-3.99957	-5.32757
							-3.9073	-3.24181	-2.21068	-4.30958	-4.10755	-5.23902
							-5.57805	-3.18358	-3.7375	-5.08308	-4.20089	-5.71231
							-5.67531	-3.1061	-2.09693	-4.72745	-4.07669	-6.03785
							-5.28303	-3.36136	4.45405	-5.00321	-5.02066	-6.1594
							-4.79087	-2.91416	-4.54605	-5.07995	-5.29921	-6.41655
							-3.88554	-3.52549	-3.92973	-5.11221	-11.1498	-6.56825
							-4.83412	-2.89038	-4.81626	-4.6563	-4.35833	-6.75583
							-5.43783	-4.30661	2.90166	-5.23933	-11.4319	-6.95957
							-5.6227	-2.98736	-4.47104	-4.91028	-6.26149	-7.11514
							-5.39442	-3.24389	-4.69026	-4.83712	-11.6123	-7.41324
							-5.56119	-2.94387	-4.1463	-5.33564	-12.5827	-7.54033
							-4.57822	-3.78846	-4.08882	-4.93128	-10.4005	-7.56356
							-5.65026	-3.00262	-4.82846	-4.83866	-4.5465	-6.65995
							-5.53441	-3.06163	-4.99814	-5.02286	-11.397	-5.40322
							-4.29276	-2.86302	-3.57586	-4.95368	-7.68462	-7.16175
							-4.43017	-3.30036	-3.52879	-4.82653	-14.9889	-5.90004
							-3.98166	-2.99669	-5.12689	-4.66462	-4.70118	-7.36069
							-3.9527	-3.4712	-5.17255	-4.9389	-12.3348	-5.42923
							-5.58008	-3.17929	-5.1934	-4.68952	-9.97493	-6.3919
							-5.43749	-2.87634	-5.15398	-4.58599	-11.8295	-7.46545
							-5.69705	-3.00084	-2.95713	-4.73979	-6.84817	-5.56755
							-5.52972	-4.29662	-5.08667	-4.75045	-12.5185	-7.31388
							-5.50216	-3.00327	-2.85273	-5.04421	-9.58376	-5.55497
							-4.15525	-3.009	5.02617	-4.97041	-4.95082	-6.93369
							-4.99984	-3.9316	-2.49852	-4.64739	-10.8837	-6.34639
							-5.57643	-2.78644	-4.82704	-4.66957	-9.56179	-5.88866
							-5.55854	-3.02679	-2.32912	-5.19181	-6.97239	-5.3792
							-5.25477	-3.03208	-4.51721	-4.59811	-7.26614	-5.74217
							-3.9546	-2.75014	-4.01655	-4.34211	-5.20901	-7.36697
							-4.58366	-2.97609	-2.24295	-4.95082	-7.05123	-7.19777
							-3.82347	-3.01059	-2.1564	-4.75394	-7.04083	-5.7295
							-3.87309	-3.03163	-2.19646	-4.1619	-6.14055	-6.88615
							-4.7062	-3.36448	-2.25215	-4.70632	-7.35844	-6.51709
							-5.55138	-4.18439	-2.26194	-4.88126	-6.30425	-6.0665
							-5.60126	-3.01558	2.86812	-4.83422	-4.29562	-5.32767
							-5.70705	-2.73405	2.41047	-4.80531	-6.21227	-5.81742
							-5.50102	-2.97062	2.47863	-4.95931	-6.22193	-7.12708
							-5.5262	-2.78034	2.7811	-4.82388	-3.10385	-6.89152
							-5.53309	-3.75656	2.74837	-4.62481	-5.99452	-7.16061
							-5.47437	-2.88179	2.59851	-4.59837	-6.06876	-7.05853
							-3.99188	-2.72147	2.83148	-4.53446	-5.86124	-6.09142
							-4.53259	-2.97654	-5.34182	-4.60146	-5.7707	-6.60616
							-3.9361	-3.1639	-4.66279	-5.05626	-6.49902	-6.30528
							-5.56015	-2.95238	-5.21602	-4.7747	-2.41894	-5.49212
							-4.20413	-2.88776	-4.88992	-4.83261	-5.45686	-6.7324
							-5.45845	-2.75353	-2.29439	-4.68666	-5.56852	-6.80182
							-5.30667	-2.8676	-4.35833	-4.79844	-5.60125	-6.11799
							-5.47856	-4.14705	-2.56237	-4.54149	-6.19221	-6.39051
							-5.4586	-3.2478	-4.2016	-4.55536	-3.48412	-6.77211
							-4.23533	-3.06912	2.66757	-4.53273	-5.66413	-6.3296
							-4.83224	-2.76704	-2.23626	-4.45852	-5.52162	-6.04249
							-5.59038	-2.83708	-3.70089	-4.41974	-5.11456	-5.82536
							-5.48291	-2.79965	2.8102	-4.54637	-5.97032	-6.22371
							-4.05597	-2.82532	2.69639	-4.77605	-4.90834	-6.53052
							-4.32937	-3.65675	-2.96116	-4.89761	-5.38788	-6.55339
							-5.49674	-2.73742	2.40777	-4.65427	-5.34901	-6.12433
							-3.67227	-3.17071	-5.28653	-4.75896	-5.36887	-6.60252
							-5.46837	-3.02383	2.59938	-4.31146	-5.34187	-6.53431
							-5.50837	-2.86184	-4.81673	-4.91616	-5.90243	-6.25839
							-5.00485	-4.10163	2.24175	-4.77063	-5.17285	-5.98667
							-5.48582	-2.74932	5.31018	-4.58264	-5.54091	-6.74665
							-3.74972	-3.05383	-2.39458	-4.66613	-5.2668	-6.44924
							-5.39977	-3.81111	-5.53662	-4.59826	-5.37916	-6.9584
							-5.54296	-2.92305	-4.5465	-4.45324	-5.30175	-6.92537
							-3.6175	-2.78909	-4.52422	-4.44977	-5.31878	-6.05074
							-5.39348	-3.35848	-3.70782	-4.76242		-6.7475
							-3.77861	-2.80664	2.78386	-4.47683		-6.73013
							-5.51079	-2.91969	-4.31972	-4.48823		-7.14173
							-5.28245	-2.94606	2.57963	-4.45896		-6.94411
							-4.45328	-2.77002	-2.64678	-4.82519		-7.13379
							-3.66216	-2.81596	-3.23459	-4.46447		-6.2604
							-5.07301	-3.05743	-2.20224	-4.85717		-7.06931
							-5.50191	-3.20918	2.38785	-4.64088		-6.95108
							-3.83188	-2.94377	2.15855	-4.64925		-7.1444
							-5.48984	-3.21327	-4.89859	-4.73672		-7.11084
							-4.63867	-4.04691	-5.3495	-4.65877		-7.04483
							-5.3045	-3.66166	-5.03356	-4.79428		-6.46531
							-5.13491	-2.81321	-4.0367	-4.57157		-6.66249
							-5.43772	-2.99083	-2.37719	-4.49254		-6.87975
							-5.3427	-3.29476	-4.70118	-4.56842
							-4.04323	-2.67272	2.17906	-4.50591
							-3.94338	-2.7414	-5.58906	-4.62235
							-5.27994	-2.88068	-2.70503	-4.65363
							-5.25221	-3.45008	-2.10331	-4.73852
							-5.09715	-3.11067	-3.29908	-4.29696
							-5.1514	-2.91631	-5.13298	-4.65515
							-5.44056	-2.83951	-4.44492	-4.29283
							-3.53459	-3.1016	2.04973	-4.46679
							-3.46492	-3.10136	-4.31976	-4.88954
							-3.90371	-4.02462	-5.47171	-4.65309
							-5.50234	-2.88324	-5.47294	-4.50687
							-4.86451	-2.86044	-2.80637	-4.78394
							-4.12857	-3.30891	-4.95082	-4.74415
							-5.21372	-2.62342	-2.31102	-4.74991
							-5.02489	-2.90232	2.02771	-4.77068
							-5.45478	-2.83419	-4.55338	-4.76129
							-3.6716	-3.00491	-3.48615	-4.73536
							-5.11618	-3.73721	-5.32783	-4.66557
							-3.88231	-3.28534	-5.16196	-4.68113
							-3.8585	-3.52965	-5.22024	-4.63003
							-4.30958	-3.64391	-2.49435	-4.54998
							-5.08308	-2.82314	-4.93032	-4.76261
							-4.72745	-4.04027	2.11185	-4.54449
							-5.00321	-3.26341	-4.43721	-4.65808
							-5.07995	-2.539	-5.20901	-4.80622
							-5.11221	-2.96793	-2.76557	-4.78902
							-5.64814	-3.062	-2.22534	-4.86337
							-3.69311	-2.76912	-4.38796	-4.81078
							-4.6563	-3.61707	-3.34782	-4.41196
							-5.23933	-2.74451	-4.29562	-4.64473
							-4.91028	-3.71316	-2.45137	-4.82953
							-3.519	-3.78193	-3.42829	-4.48952
							-4.83712	-3.51858	-3.54973	-4.57533
							-5.33564	-2.99176	-2.79513	-4.76769
							-5.65081	-2.73347	-3.10385	-4.29433
							-3.41559	-4.04308	-2.94828	-4.71778
							-3.69832	-3.31189	-3.04113	-4.85834
							-4.93128	-2.44361	-2.41894	-4.71748
							-4.83866	-2.87253		-4.32362
							-3.96626	-3.1986		-4.54963
							-5.02286	-3.80371		-4.78878
							-4.95368	-3.75099		-4.83022
							-3.71232	-2.60626		-4.70192
							-4.82653	-3.75114		-4.77875
							-4.66462	-3.63952		-4.84863
							-5.37478	-3.12507		-4.69441
							-4.9389	-3.80116		-4.87648
							-4.68952	-3.02141		-4.92066
							-4.58599	-3.58581		-4.79421
							-4.73979	-3.7683		-4.48766
							-4.75045	-2.76013		-4.79875
							-5.04421	-4.0195		-4.81223
							-3.92053	-3.45378		-4.87968
							-3.44174	-2.35016		-4.80655
							-4.97041	-3.74705		-5.03339
							-5.47345	-2.58932		-4.76705
							-4.64739	-2.48122		-4.82031
							-4.66957	-2.90733		-4.31757
							-5.19181	-3.3387		-4.8047
							-5.59275	-3.90866		-4.89892
							-4.59811	-3.78756		-4.40306
							-4.34211	3.68244		-4.63315
							-3.64726	-3.10632		-4.99549
							-3.87324	-3.88675		-4.84956
							-5.68713	-4.00138		-4.86099
							-4.95082	-3.96939		-4.3683
							-4.75394	-2.75341		-4.39033
							-3.61434	-2.25179		-4.89845
							-4.1619	-3.76162		-4.36357
							-3.84373	-2.48454		-4.75553
							-3.99234	-3.85183		-5.05892
							-3.73732	3.56373		-4.98608
							-4.70632	-3.89527		-5.09157
							-4.88126	-3.88342		-4.94103
							-3.60163	-4.02574		-4.93835
							-4.83422	3.88108		-4.72904
							-4.80531	-2.90004		-4.92935
							-4.95931	3.35515		-4.87122
							-4.82388	3.55802		-4.96967
							-3.84181	-4.01819		-5.1119
							-4.62481	-2.61568		-4.60432
							-3.46808	-3.99251		-4.75395
							-4.59837	-2.2433		-4.98934
							-4.53446	-4.0096		-4.85921
							-4.60146	3.13624		-4.31361
							-5.2531	-3.79085		-4.45482
							-3.51499	-3.82501		-5.07462
							-3.59997	-2.14956		-4.18629
							-5.55355	4.01379		-4.87075
							-3.82205	3.81248		-4.5906
							-5.05626	-2.43535		-4.28239
							-3.67531	-4.11687		-5.00021
							-3.81165	-4.12419		-5.10362
							-5.40663	2.91208		-5.08478
							-3.58193	-3.93503		-4.99145
							-3.64808	-4.08784		-4.64547
							-4.7747	-4.0738		-4.71655
							-4.83261	3.6662		-5.11469
							-4.68666	-3.78825		-4.98262
							-4.79844	4.04257		-5.15164
							-4.54149	2.27339		-4.21746
							-4.55536	3.24402		-5.09571
							-4.53273	-2.08373		-5.03256
							-4.45852	2.67909		-4.22144
							-4.41974	4.17686		-5.01231
							-3.74259	3.97892		-5.04431
							-4.54637	-3.80409		-5.11075
							-4.77605	-4.15628		-4.31156
							-3.58478	-4.06688		-4.27278
							-4.89761	2.48317		-4.25133
							-3.77742	-4.20464		-5.07785
							-5.57091	2.95446		-4.8754
							-3.88242	4.16279		-5.12864
							-5.19799	-3.84601		-4.83901
							-3.71574	-4.04851		-4.92846
							-4.65427	3.61933		-4.21823
							-4.75896	2.13052		-5.05036
							-3.56893	4.11412		-4.66026
							-3.76931	3.92212		-5.07438
							-4.31146	-3.80131		-5.09976
							-4.91616	3.10515		-5.12257
							-4.77063	3.48399		-5.09441
							-4.58264	2.85494		-4.14679
							-4.66613	-4.05121		-4.39741
							-4.59826	4.25397		-3.99621
							-3.62955	-3.77756		-4.77213
							-3.53841	-4.18718		-4.77486
							-4.45324	-4.02855		-4.93717
							-3.98852	2.24951		-4.24058
							-3.58914	-3.84104		-5.03806
							-4.44977	4.28131		-4.11137
							-3.5354	3.75244		-4.88546
							-4.76242	3.33865		-4.96996
							-5.40722	-3.82928		-5.03211
							-4.47683	2.62994		-4.17981
							-4.48823	4.24719		-5.14974
							-3.65352	3.15098		-5.09185
							-4.01358	4.12541		-5.01688
							-4.45896	-3.72523		-5.03266
							-3.77931	3.5622		-4.90336
							-4.82519	3.98558		-3.94564
							-5.3171	-3.97474		-4.05544
							-4.46447	-4.09272		-4.01119
							-4.85717	4.31554		-5.03549
							-4.64088	2.98379		-5.02152
							-3.70821	-3.97937		-4.87592
							-4.64925	4.29171		-4.42958
							-3.60535	-4.23006		-4.73639
							-4.73672	-3.77877		-4.25127
							-3.50897	2.40695		-3.79965
							-5.15829	4.25118		-5.09481
							-3.62079	-3.77442		-4.9137
							-4.65877	3.90741		-4.64507
							-4.79428	3.72021		-4.83858
							-3.58934	3.39866		-3.878
							-3.47058	4.14382		-4.92386
							-4.57157	4.32828		-5.02312
							-3.78177	3.57039		-5.08217
							-5.4146	2.89641		-4.91407
							-3.54264	-3.89481		-5.14412
							-4.49254	4.34093		-4.95153
							-4.24956	-3.70864		-4.06974
							-4.56842	4.29233		-4.84483
							-4.50591	2.50063		-4.60541
							-3.40196	-3.90997		-4.88248
							-3.41277	4.27631		-4.90483
							-4.62235	-3.71236		-3.88635
							-4.65363	-3.78613		-4.28682
							-4.73852	-4.02445		-4.81977
							-5.38004	3.21556		-4.89015
							-4.29696	2.80278		-3.69208
							-3.98128	3.80643		-3.74167
							-5.39761	4.35574		-5.0966
							-4.65515	2.57625		-3.81084
							-4.29283	4.14378		-4.9908
							-4.46679	4.32663		-4.90555
							-4.88954	4.21323		-4.76404
							-4.65309	3.05772		-4.90769
							-4.50687	3.42905		-5.09793
							-4.78394	4.38406		-4.8019
							-3.89852	3.58855		-4.91068
							-4.74415	-4.06797		-4.94199
							-3.36279	-3.81919		-3.60263
							-3.41614	-3.85283		-4.45812
							-3.41217	-3.62573		-4.6731
							-4.74991	4.266		-4.77485
							-4.77068	-3.59768		-5.01515
							-3.48977	2.64284		-3.76304
							-3.79304	3.40813		-5.06607
							-4.24823	4.3651		-4.78529
							-4.76129	4.15289		-3.95486
							-4.73536	3.78035		-4.10535
							-5.0192	3.58312		-5.02191
							-3.39118	-3.95912		-4.83534
							-4.34024	4.30817		-4.79267
							-4.66557	3.04312		-4.67933
							-4.68113	4.04478		-4.84437
							-3.96036	4.35364		-4.8504
							-4.63003	4.24067		-4.72692
							-3.30863	-3.66686		-4.8902
							-4.54998	-3.82626		-3.52828
							-3.58358	2.62901		-3.54065
							-3.29833	3.28005		-4.75343
							-4.76261	2.9509		-4.68111
							-3.31006	-3.5571		-4.87705
							-5.23096	4.08773		-5.01024
							-4.54449	3.5686		-4.96422
							-4.65808	-3.82875		-4.29819
							-5.40573	4.35202		-3.6323
							-3.53006	-3.59683		-4.80736
							-4.80622	2.56586		-4.56629
							-5.53748	3.82486		-3.36996
							-4.90078	3.99922		-3.78209
							-3.28214	3.26196		-4.67506
							-3.27411	-3.59797		-4.75597
							-3.435	4.31128		-4.80408
							-4.78902	4.23306		-4.79333
							-4.86337	3.48363		-3.84374
							-4.81078	4.13953		-4.74698
							-4.41196	4.21694		-4.66188
							-3.34161	4.29824		-4.96465
							-4.64473	2.96242		-4.73868
							-4.82953	4.00828		-4.9132
							-5.50207	2.48396		-4.69054
							-4.48952	-3.81935		-3.39166
							-4.15244	-3.72505		-3.38174
							-4.85797	3.80124		-4.61155
							-4.57533	2.39457		-3.62122
							-4.76769	4.33997		-4.00688
							-4.29433	3.50551		-4.68533
							-3.24033	-3.90295		-4.92978
							-4.71778	-3.63864		-4.5843
							-4.35569	2.3053		-4.37876
							-4.85834	4.31045		-4.71488
							-3.08055	2.86051		-3.59394
							-5.3131	4.32969		-4.62601
							-4.71748	2.2239		-4.69171
							-3.10813	4.19049		-3.17422
							-4.32362	4.23685		-4.54829
							-4.29925	3.87035		-4.89504
							-4.54963	4.07963		-4.8295
							-3.32888	2.62596		-3.48751
							-5.44713	3.16277		-4.64072
							-4.78878	4.04419		-4.936
							-4.83022	-3.56823		-4.60056
							-4.70192	4.16263		-4.58968
							-3.11162	-3.85175		-4.60322
							-3.22643	4.33005		-4.71151
							-3.89105	-3.63942		-3.2366
							-4.77875	3.53686		-3.71972
							-5.19936	4.32854		-4.06354
							-4.84863	4.29135		-4.48188
							-3.504	-3.78545		-4.88346
							-3.04116	2.59726		-2.99171
							-4.0293	3.91787		-4.50311
							-3.3113	3.16637		-4.44113
							-4.69441	4.24998		-3.21247
							-4.87648	4.18056		-4.95359
							-3.39707	-3.59792		-4.47258
							-4.9074	4.07368		-4.48744
							-3.5508	4.30738		-4.4629
							-3.20412	4.23298		-4.41897
							-4.92066	4.08192		-4.79417
							-4.79421	2.89502		-4.23633
							-4.48766	3.43177		-4.43723
							-5.61437	-3.87469		-4.57522
							-5.07514	-3.82274		-4.46118
							-3.81707	4.1325		-3.17966
							-3.1318	4.03953		-4.95252
							-4.79875	4.25122		-4.76033
							-4.31231	3.27085		-2.96907
							-4.81223	2.90333		-4.41752
							-4.87968	-3.59493		-4.38895
							-3.20042	4.03159		-3.99088
							-4.80655	4.23934		-4.27017
							-3.02978	-3.69615		-3.70992
							-5.03339	4.08564		-4.45928
							-4.30369	4.17628		-4.37161
							-4.76705	-3.59454		-4.27043
							-2.87813	3.74226		-4.33792
							-5.59349	4.1928		-4.87051
							-5.45456	2.74718		-4.32298
							-4.82031	4.15251		-4.59659
							-4.31757	3.93164		-4.32856
							-3.87455	4.12036		-4.01138
							-4.8047	-3.74788		-2.7202
							-2.97037	3.90114		-2.91386
							-3.24181	-3.75114		-3.44315
							-3.18358	3.4946		-4.21137
							-4.89892	4.0958		-4.72183
							-4.40306	3.13798		-4.24922
							-4.63315	-3.81333		-4.23713
							-4.99549	2.84985		-4.37474
							-4.84956	4.03843		-4.07706
							-3.1061	3.96568		-4.23393
							-4.86099	4.10427		-3.6974
							-4.3683	3.06714		-4.22052
							-3.36136	4.09191		-4.16915
							-2.91416	4.07524		-4.1493
							-4.39033	4.02227		-4.54012
							-4.94814	-3.63676		-2.45817
							-4.89845	4.04013		-4.15122
							-3.30525	4.04495		-3.78161
							-3.52549	3.32101		-4.06144
							-4.36357	3.96198		-2.89804
							-4.75553	-3.73171		-4.34184
							-5.05892	-3.68148		-3.45944
							-4.98608	3.6806		-3.9861
							-5.09157	-3.8209		-4.11743
							-4.94103	-3.55271		-4.01666
							-2.89038	3.96532		-3.87853
							-5.30568	3.17254		-3.74686
							-4.93835	3.96036		-3.97388
							-5.88681	2.90166		-2.30354
							-5.14958	3.87773		-4.1414
							-4.30661	3.88254		-4.22338
							-2.98736	3.87479		-2.99765
							-4.14403	3.91521		-3.34711
							-4.72904	3.91559		-4.13724
							-3.24389	3.86442		-2.42271
							-4.92935	3.93572		-3.52971
							-5.523	3.93551		-3.80376
							-4.87122	3.84968		-3.68273
							-3.13592	3.94486		-3.78435
							-5.73571	3.94767		-4.20347
							-4.96967	3.99551		-2.58841
							-5.1119	3.80955		-3.18462
							-3.52374	4.01073		-3.8433
							-4.60432	-3.78805		-3.43973
							-4.37268	4.00759		-4.14691
							-2.94387	-3.7656		-2.64516
							-4.75395	3.98916		-3.59286
							-3.78846	3.97049		-3.76506
							-3.00262	-3.72537		-3.99996
							-4.98934	-3.72026		-2.75876
							-4.85921	3.88615		-3.88167
							-4.31361	3.8275		-2.9672
							-4.39845	-3.66032		-3.6797
							-3.89423	-3.64782		-3.20317
							-3.06163	3.67635		-3.44636
							-2.86302	-3.60745		-4.3006
							-4.45482	3.47636		-3.39479
							-5.3866	-3.58724		-4.96455
							-3.30036	3.25969		-2.79731
							-5.07462	-3.55938		-5.44867
							-2.99669	3.06647		-2.60458
							-4.18629	-3.50302		-5.64994
							-3.4712	2.99486		-4.80887
							-5.14767	2.93108		-4.19672
							-4.87075	2.86812		-2.5082
							-4.5906	-3.64463		-5.64027
							-3.17929	2.83148		-3.30489
							-4.28239	3.79387		-5.20858
							-5.00021	3.0693		-2.94688
							-5.87727	3.79256		-2.32816
							-2.87634	-3.50049		-5.51452
							-5.10362	-3.71468		-4.43347
							-3.00084	3.51169		-3.74517
							-5.08478	-3.57721		-5.28307
							-4.29662	-3.64821		-3.3063
							-4.99145	3.7995		-2.14605
							-3.00327	3.23154		-5.36288
							-5.7868	3.86115		-3.03127
							-4.64547	3.8198		-2.64366
							-4.71655	-3.58387		-5.3984
							-6.14709	3.78956		-5.49133
							-5.11469	3.79051		-2.05786
							-4.98262	3.87341		-4.86137
							-5.15164	2.98238		-3.52012
							-3.009	3.89564		-3.82517
							-4.21746	3.73751		-5.21693
							-3.19053	3.76045		-5.3852
							-5.16437	2.8102		-4.37191
							-5.09571	-3.63308		-3.12376
							-5.03256	3.07268		-5.37185
							-5.45243	3.71389		-2.56791
							-5.73589	3.26538		-4.12704
							-3.9316	-3.58142		-3.5078
							-4.22144	3.64393		-5.37498
							-5.01231	-3.49665		-2.17493
							-2.78644	3.77666		-5.43079
							-3.02679	-3.67586		-5.32004
							-3.65598	3.70401		-5.09105
							-5.37664	2.78386		-5.47986
							-4.20537	3.66488		-3.3528
							-3.03208	3.38228		-4.56063
							-5.04431	-3.41883		-3.93397
							-2.93001	3.64286		-5.52413
							-5.11075	3.65608		-5.41507
							-4.31156	-3.53114		-4.85155
							-2.75014	3.60495		-5.68211
							-4.27278	3.6591		-4.26215
							-2.97609	-3.43529		-3.09164
							-5.32675	2.92126		-2.58915
							-5.22555	3.03569		-2.32416
							-4.25133	3.645		-3.79445
							-3.01059	3.56646		-5.4202
							-5.67238	3.56552		-5.64104
							-5.07785	-3.48791		-5.55415
							-4.8754	-3.55153		-6.0101
							-3.03163	3.05705		-4.60797
							-6.12072	2.80378		-4.24316
							-5.12864	3.61099		-5.32489
							-4.83901	3.43954		-5.70655
							-3.36448	3.53176		-3.37947
							-5.88634	3.48136		-4.0899
							-2.99173	-3.34808		-3.70082
							-4.92846	3.61051		-5.56168
							-4.21823	3.62721		-5.01058
							-4.18439	2.86446		-2.46525
							-3.01558	3.34363		-5.9332
							-5.05036	2.69361		-6.30513
							-2.73405	-3.47186		-2.93546
							-3.29572	3.4387		-5.5001
							-2.97062	3.43926		-5.87497
							-6.3975	3.01926		-5.72392
							-2.78034	-3.36717		-4.0337
							-4.66026	3.52681		-6.16308
							-5.07438	-3.37605		-4.39514
							-5.09976	3.5688		-4.60533
							-5.1872	-3.31459		-5.87359
							-4.45467	3.5455		-5.62671
							-5.12257	2.82096		-6.5484
							-5.09441	2.59761		-2.58604
							-4.14679	3.2968		-4.35369
							-4.39741	3.26544		-5.02066
							-3.9816	3.57191		-2.6903
							-3.99621	3.29862		-6.43183
							-3.75656	2.45372		-5.74169
							-2.88179	3.37125		-3.81946
							-4.77213	2.6377		-3.51033
							-3.59739	3.54521		-3.04829
							-4.77486	2.448		-6.11203
							-2.72147	-3.23794		-5.37845
							-6.25221	3.43851		-5.56087
							-2.9393	2.91104		-4.95239
							-4.93717	3.43469		-6.76785
							-5.45261	2.44581		-4.81231
							-4.24058	3.12524		-2.68432
							-5.75767	-3.31119		-6.39384
							-5.03806	-3.28532		-6.59723
							-4.32945	2.40747		-5.9594
							-4.11137	3.47464		-2.79255
							-4.88546	2.60547		-5.35479
							-2.97654	3.52342		-6.04558
							-4.96996	3.2451		-3.49723
							-5.03211	3.51646		-6.24985
							-5.37003	2.80347		-4.20169
							-3.1639	3.52634		-5.80568
							-4.17981	3.33446		-6.91126
							-5.14974	-3.22938		-5.58982
							-5.09185	2.62399		-3.91831
							-3.03471	3.09411		-2.61816
							-2.95238	3.04642		-4.59711
							-2.88776	2.38212		-3.23392
							-2.75353	-3.139		-2.75903
							-2.8676	3.4815		-4.90357
							-5.01688	-3.3274		-6.62556
							-4.14705	2.82443		-5.3705
							-5.61467	3.48393		-7.0569
							-6.64281	-3.14606		-6.25187
							-3.2478	2.42446		-6.4298
							-6.05671	2.51216		-2.6836
							-5.03266	2.32405		-5.63131
							-3.06912	-3.19565		-5.10564
							-4.90336	-3.20419		-5.83904
							-2.76704	3.26712		-6.05851
							-3.94564	3.41719		-3.76922
							-5.26667	3.06372		-3.00028
							-4.05544	2.33349		-4.51355
							-6.3176	3.53343		-5.56305
							-4.01119	3.39117		-2.72393
							-5.03549	2.70236		-4.28425
							-5.02152	2.83042		-6.97877
							-4.87592	3.50575		-7.16087
							-3.31997	3.50518		-5.32675
							-2.83708	2.52057		-6.42322
							-4.42958	2.17221		-4.93142
							-5.52694	-3.03047		-3.43942
							-2.79965	3.54564		-2.88303
							-4.73639	-3.08387		-6.61243
							-4.25127	-3.13919		-6.20122
							-2.82532	-3.26814		-5.55131
							-5.84491	3.45451		-5.81702
							-2.87218	2.64324		-6.37025
							-3.65675	3.43035		-5.22523
							-3.79965	2.45349		-6.01225
							-5.09481	2.13155		-7.1381
							-4.9137	3.52954		-4.13292
							-4.64507	3.54471		-2.73236
							-2.73742	3.19132		-6.18328
							-4.83858	1.95811		-7.25334
							-3.878	3.51876		-2.81967
							-3.17071	2.77796		-6.89193
							-4.27319	1.86589		-6.3266
							-3.02383	2.06431		-4.78775
							-3.6766	3.43117		-4.50703
							-4.92386	-3.21914		-3.15674
							-2.86184	-3.005		-5.51515
							-5.02312	3.28419		-5.67301
							-5.08217	-3.07573		-6.32131
							-6.30013	1.68196		-7.06767
							-5.49708	3.55584		-6.73769
							-6.83712	-3.107		-5.16643
							-4.10163	3.50091		-5.93211
							-2.74932	3.33396		-7.34223
							-4.91407	1.69292		-3.80774
							-5.14412	2.49679		-7.21794
							-4.95153	3.40194		-2.98751
							-3.05383	3.08938		-3.48233
							-5.72323	2.23083		-6.12835
							-4.06974	2.59627		-6.54186
							-3.81111	2.78248		-4.37781
							-6.14528	-3.01833		-2.87254
							-4.84483	3.25045		-6.44896
							-5.1734	1.39158		-5.45585
							-2.92305	-3.22547		-4.8613
							-2.78909	3.56394		-6.63573
							-4.60541	3.55204		-2.75321
							-4.88248	-3.06195		-5.64146
							-3.35848	1.59777		-7.14441
							-4.12274	3.45795		-6.50449
							-4.90483	3.51671		-6.94987
							-3.88635	3.43241		-7.43709
							-5.969	2.83197		-5.88822
							-3.01583	2.36912		-3.14691
							-4.28682	-3.09947		-6.44425
							-3.40883	3.04406		-5.16515
							-4.81977	1.81869		-6.21271
							-2.80664	3.29683		-7.33059
							-6.66107	1.35729		-3.61729
							-2.91969	-3.05043		-4.34782
							-4.89015	2.09054		-5.41465
							-3.69208	2.57327		-4.70237
							-2.81225	3.52928		-5.58101
							-3.74167	3.32248		-6.51928
							-5.0966	1.08634		-7.54824
							-2.94606	-3.09618		-3.96097
							-3.81084	3.60686		-2.95266
							-4.9908	-3.23543		-3.40509
							-4.90555	3.43657		-5.75793
							-3.5449	3.53556		-6.73975
							-2.77002	1.50543		-6.60239
							-4.76404	2.25759		-6.96758
							-4.90769	1.83015		-7.19864
							-5.49473	-3.13925		-2.88031
							-2.81596	2.75891		-7.66408
							-5.09793	3.08639		-7.49723
							-4.18304	0.774459		-6.19305
							-4.8019	2.44507		-3.21511
							-6.49117	-3.14519		-6.54671
							-5.78268	3.41245		-4.23505
							-3.05743	3.28005		-5.97821
							-4.91068	1.74058		-5.67391
							-3.20918	3.57566		-6.42806
							-2.70852	1.17383		-3.65568
							-5.99422	3.61064		-4.67231
							-7.0147	3.62384		-3.9831
							-2.94377	-3.28552		-6.86251
							-3.21327	2.93264		-6.74433
							-4.94199	3.48972		-7.08262
							-4.04691	1.48715		-7.80654
							-3.60263	0.779992		-5.33394
							-3.79024	2.1613		-6.60419
							-4.45812	1.02906		-3.14917
							-4.6731	3.15007		-7.60071
							-4.77485	-3.40137		-5.88472
							-6.30201	2.62077		-6.66086
							-5.03374	-3.20396		-6.53021
							-5.01515	3.65672		-6.10609
							-5.38903	3.59632		-3.28545
							-3.76304	1.89326		-3.0924
							-3.66166	3.63395		-4.206
							-5.06607	3.57449		-7.97322
							-4.78529	1.36446		-7.25665
							-3.95486	2.92423		-7.8074
							-2.81321	3.32692		-3.45662
							-2.99083	0.999556		-7.42304
							-5.21114	-3.54245		-7.07794
							-3.29476	-3.40156		-3.98364
							-4.10535	2.24908		-6.70602
							-5.02191	-3.2752		-6.54721
							-4.83534	1.22434		-6.82633
							-2.67272	3.70352		-5.63899
							-2.7414	1.66542		-5.31504
							-2.88068	3.49952		-6.25571
							-3.65004	2.75205		-8.13145
							-4.79267	2.54777		-6.60962
							-3.45008	2.02731		-7.62613
							-4.09601	3.21679		-3.28523
							-3.43823	3.62106		-5.00273
							-3.11067	-3.69969		-5.98428
							-4.67933	3.41739		-3.71865
							-6.80643	2.94367		-7.26814
							-4.84437	-3.43936		-4.29579
							-2.91631	1.65689		-3.25007
							-4.8504	-3.53293		-6.37138
							-4.72692	-1.33744		-8.04286
							-4.8902	1.97314		-5.77254
							-5.90038	3.72806		-4.71022
							-5.61239	-3.38744		-6.80887
							-3.52828	3.57514		-8.27221
							-2.83951	2.49177		-6.14129
							-3.54065	3.20443		-7.85203
							-4.75343	-3.67533		-5.34193
							-4.68111	3.78964		-7.62083
							-3.1016	2.87496		-6.49225
							-4.87705	2.29052		-6.64435
							-7.27756	1.73662		-7.46364
							-6.32085	1.92754		-7.01721
							-5.01024	-3.63517		-5.54311
							-3.10136	-1.73538		-3.33151
							-4.02462	3.15943		-6.2364
							-4.10348	-3.50978		-4.04895
							-3.1968	2.17761		-3.48708
							-2.88324	3.72082		-8.23657
							-5.05502	3.42129		-6.30176
							-4.96422	2.57197		-7.26843
							-4.29819	-3.79195		-4.46104
							-2.86044	2.81361		-3.68628
							-3.6323	3.62137		-8.38298
							-3.30891	3.81938		-5.81541
							-5.17676	2.05144		-3.31077
							-2.62342	-3.84615		-8.07465
							-3.95891	-3.71284		-4.97312
							-2.90232	3.09399		-6.87151
							-2.83419	2.45004		-7.77718
							-4.80736	-2.12076		-6.09729
							-4.56629	3.35329		-7.55501
							-3.36996	-3.61178		-5.34691
							-3.78209	2.29505		-3.90591
							-4.67506	2.71672		-6.3337
							-4.75597	3.7564		-7.15437
							-3.00491	-3.78729		-8.3986
							-3.73721	-3.85424		-7.93591
							-6.94251	-2.24137		-6.60063
							-3.53445	-3.85534		-7.3761
							-4.80408	-2.26847		-8.2285
							-2.79724	3.19071		-5.9052
							-3.28534	2.95903		-5.58577
							-4.79333	-2.36643		-4.08964
							-3.84374	3.55577		-3.45099
							-5.37741	-3.71155		-4.34789
							-5.93523	2.64804		-6.95129
							-4.74698	-3.84636		-4.68137
							-4.66188	-3.84652		-3.31941
							-5.57208	-3.68344		-5.34922
							-4.96465	-3.80627		-7.77593
							-3.52965	3.33221		-3.79012
							-3.64391	-2.518		-8.36182
							-4.73868	-2.62715		-7.4966
							-6.39199	-2.45669		-3.63764
							-4.9132	-3.75739		-6.36024
							-2.82314	3.17211		-6.09369
							-3.85855	2.9734		-8.38942
							-5.02623	-3.78949		-5.76735
							-5.788	-3.54172		-4.94292
							-4.69054	-2.64939		-3.94713
							-3.39166	-2.85845		-6.84165
							-7.3363	-2.65424		-7.98705
							-3.38174	-3.6444		-7.33163
							-4.04027	-3.78632		-7.04419
							-3.26341	3.28079		-4.24246
							-4.61155	-2.76031		-6.4432
							-2.539	-2.5618		-5.52906
							-3.62122	-3.73833		-4.4537
							-4.00688	-2.65252		-8.15382
							-2.99596	3.0791		-8.24087
							-4.07639	-3.7953		-6.2202
							-2.96793	-3.83803		-3.81939
							-5.27358	-2.77353		-8.22047
							-4.68533	-3.39657		-5.94982
							-3.062	-2.84269		-7.49867
							-4.92978	-3.61512		-3.34576
							-6.79768	-2.96383		-5.21634
							-2.52423	-2.8257		-3.45406
							-3.83636	-2.68905		-4.59827
							-5.54951	-2.72514		-6.69547
							-6.27194	-3.08215		-4.89161
							-4.5843	-3.65798		-7.18949
							-4.03784	-2.5045		-6.90892
							-2.76912	-3.45961		-7.68329
							-4.37876	-3.75544		-8.08082
							-4.71488	-2.8121		-8.04626
							-3.61707	-2.85039		-4.09924
							-3.59394	-3.83109		-4.3357
							-4.62601	-3.2637		-6.35093
							-4.69171	-3.48225		-8.02265
							-2.74451	-2.87995		-5.71436
							-3.17422	-2.75903		-7.74507
							-2.83984	-3.65891		-6.08268
							-3.71316	-2.7144		-7.27737
							-5.20912	-2.82571		-7.46143
							-3.78193	-3.04476		-7.00915
							-4.54829	-2.65953		-5.33174
							-3.51858	-2.60633		-3.71814
							-6.60966	-3.40859		-7.89816
							-2.99176	-3.7689		-6.63937
							-4.89504	-2.8421		-5.01285
							-6.13991	-2.68844		-7.924
							-4.8295	-2.78136		-7.88086
							-2.73256	-2.45787		-7.82435
							-3.48751	-2.73809		-3.37838
							-4.64072	-3.14171		-4.74055
							-2.73347	-2.57223		-3.90271
							-5.88238	-2.65198		-5.95929
							-5.04955	-3.50908		-4.39729
							-3.79107	-2.48935		-7.06294
							-4.04308	-2.7076		-3.59471
							-7.16306	-2.45706		-7.50133
							-3.31189	-2.86796		-6.83179
							-7.34325	-3.65828		-7.69738
							-5.37207	-3.16729		-7.28107
							-2.44361	-2.53698		-6.33444
							-4.936	-2.65099		-4.13528
							-5.16831	-2.40181		-7.72579
							-2.87253	-2.44854		-5.25229
							-3.83598	-2.49099		-7.59653
							-3.1986	-2.55623		-6.62976
							-4.60056	-2.28436		-6.96828
							-3.80371	-3.33703		-7.14259
							-4.58968	-2.33561		-7.29634
							-2.44599	-2.43362		-6.33104
							-3.94401	-3.51014		-5.66363
							-3.19531	-2.47653		-5.01208
							-5.55258	-2.32668		-4.70755
							-4.60322	-2.44414		-7.47815
							-4.71151	-2.9125		-7.35705
							-3.2366	-2.13119		-3.37222
							-3.75099	-2.53963		-4.52198
							-2.60626	-2.09399		-5.99915
							-3.71972	-2.32295		-3.5087
							-4.06354	-2.34505		-6.73394
							-5.79702	-3.06623		-7.37508
							-4.01688	-1.98553		-4.00737
							-3.63978	-2.1412		-4.24558
							-4.48188	-2.22148		-5.40579
							-2.7944	-3.32927		-7.308
							-4.88346	-1.94913		-6.48336
							-7.02797	-2.59795		-6.93723
							-3.75114	-2.04846		-3.75682
							-2.99171	-2.21125		-6.78523
							-4.50311	-2.20286		-6.20892
							-3.63952	-2.21758		-4.40493
							-4.44113	-1.80254		-7.02605
							-3.21247	-1.63728		-7.12842
							-5.43525	-2.88416		-5.81844
							-5.10879	-1.76186		-6.53708
							-2.41743	-1.98242		-4.97308
							-3.12507	-1.59944		-7.08037
							-4.95359	-3.13098		-4.63335
							-4.47258	-2.01808		-6.74004
							-3.80116	-2.131		-7.05415
							-6.62842	-2.25635		-3.91257
							-4.48744	-1.93901		-5.42049
							-5.27644	-1.60717		-5.96156
							-3.02141	-1.70912		-6.81182
							-6.26297	-2.56922		-4.0975
							-3.58581	-2.18255		-6.24977
							-4.96992	-1.82268		-3.54026
							-4.4629	-1.32013		-5.70233
							-3.7683	-1.42743		-6.51385
							-2.76013	-2.92406		-6.8389
							-4.41897	-1.9379		-3.38556
							-4.0195	-1.30326		-4.3531
							-4.79417	-1.58509		-6.71252
							-4.01201	-1.68328		-6.27403
							-3.45378	-2.09575		-6.50425
							-2.35016	-2.19067		-6.05854
							-7.3768	-1.25689		-6.50463
							-4.23633	-1.85952		-5.25812
							-4.43723	-2.03952		-6.52547
							-2.43589	-2.30148		-4.93396
							-3.76747	-2.67337		-5.48226
							-3.74705	-1.12718		-3.88789
							-6.94598	-1.34467		-4.5103
							-3.30988	-1.44441		-3.67512
							-2.58932	-1.76592		-6.20103
							-6.01466	-1.94528		-5.82029
							-2.48122	-2.14956		-6.3514
							-4.57522	-2.2668		-6.01639
							-4.46118	-2.36819		-6.32507
							-3.17966	-1.135		-4.26761
							-3.21119	-2.04485		-5.35162
							-2.78049	-1.23785		-6.21899
							-7.23267	-1.87144		-5.02474
							-2.90733	-1.50685		-4.08811
							-2.40714	-1.46031		-3.42852
							-4.95252	-2.03742		-5.67286
							-4.76033	-1.14722		-6.04271
							-5.47754	-1.79676		-4.66688
							-3.3387	-2.35773		-5.89945
							-3.61699	-2.22743		-6.07975
							-2.96907	-2.02071		-3.80715
							-5.38682	-1.16059		-5.91848
							-2.13515	-1.71362		-5.612
							-4.41752	-1.45098		-5.12334
							-3.90866	-1.20861		-5.36804
							-5.81288	-2.40565		-5.79453
							-5.23262	-1.36506		-3.97045
							-4.38895	-1.87039		-4.397
							-3.78756	-1.25566		-5.78519
							-3.99088	-2.19905		-5.60324
							-4.96818	-1.18262		-4.12044
							-4.27017	-1.66853		-4.69731
							-3.70992	-2.41919		-5.20198
							3.68244	-1.1142		-5.58381
							-4.45928	-2.06679		-3.53724
							-4.37161	-1.33615		-5.30693
							-4.27043	-2.37301		-3.75721
							-4.33792	-1.71174		-5.50333
							-3.10632	-2.14805		-4.89993
							-5.0745	-2.29877		-3.87738
							-3.88675	-2.02866		-4.26309
							-6.658	-2.21079		-5.05463
							-4.00138			-5.28609
							-3.96939			-4.52894
							-3.27478			-5.23669
							-7.09943			-4.77843
							-6.04609			-5.03621
							-6.3103			-3.61053
							-2.81292			-3.97154
							-3.89747			-4.18581
							-2.75341			-4.9654
							-2.25179			-4.3752
							-3.76162			-4.66834
							-4.87051			-3.70822
							-4.32298			-4.35913
							-2.48454			-3.84876
							-3.85183			-4.0753
							3.56373
							-5.76636
							-7.44917
							-3.89527
							-4.59659
							-5.5581
							-5.46973
							-3.74399
							-4.32856
							-3.88342
							-2.20098
							-2.84018
							-4.01138
							-2.7202
							-2.91386
							-5.03546
							-6.59043
							-2.37381
							-2.61253
							-3.44315
							-4.02574
							3.88108
							-2.90004
							-3.10658
							-5.31054
							-4.21137
							-4.72183
							-4.24922
							-6.92118
							-4.23713
							3.35515
							-4.37474
							3.55802
							-4.07706
							-4.01819
							-2.61568
							-4.23393
							-2.22283
							-3.99251
							-3.6974
							-2.2433
							-6.2659
							-4.0096
							-3.34153
							3.13624
							-4.91271
							-3.79085
							-3.82501
							-4.22052
							-6.12026
							-7.21166
							-2.14956
							-2.58062
							-4.16915
							-5.2161
							-5.72485
							4.01379
							-2.93233
							3.81248
							-3.49748
							-7.36992
							-3.66396
							-5.8334
							-4.1493
							-4.54012
							-2.33544
							-2.45817
							-2.43535
							-4.15122
							-6.62348
							-4.11687
							-3.78161
							-4.06144
							-5.63027
							-4.12419
							-5.07749
							-5.40378
							-2.89406
							2.91208
							-1.8736
							-6.03558
							-7.05144
							-3.93503
							-2.89804
							-4.08784
							-2.05367
							-4.34184
							-4.0738
							3.6662
							-3.43221
							-3.45944
							-2.90839
							-3.78825
							-5.74382
							-4.64928
							-3.9861
							-4.11743
							4.04257
							2.27339
							-4.01666
							3.24402
							-3.87853
							-3.74686
							-6.32292
							-2.08373
							-6.84224
							-3.97388
							2.67909
							-2.1274
							-5.17172
							-6.21922
							-6.50382
							-3.22536
							4.17686
							-4.82659
							-2.30354
							-7.23704
							-2.31454
							3.97892
							-2.16048
							-3.80409
							-6.00286
							-5.83583
							-4.1414
							-7.01223
							-4.22338
							-1.98524
							-4.15628
							-2.48548
							-4.06688
							2.48317
							-4.20464
							-4.45682
							-5.53626
							2.95446
							-5.65701
							-6.42065
							4.16279
							-3.84601
							-5.19903
							-2.79366
							-4.04851
							-2.99765
							-3.34711
							-6.65237
							-1.95856
							-1.88097
							-4.13724
							3.61933
							-2.42271
							-2.02227
							-6.29049
							2.13052
							-3.52971
							-2.59432
							-4.34707
							-6.1504
							-6.84478
							-1.96536
							-3.80376
							-7.06638
							-2.05894
							-3.68273
							4.11412
							-2.25484
							-3.78435
							3.92212
							-4.45324
							-5.74337
							-2.88468
							-3.80131
							-2.06754
							-5.14526
							3.10515
							-2.21333
							-4.66411
							-6.43762
							-4.20347
							3.48399
							2.85494
							-4.05121
							4.25397
							-5.9834
							-3.77756
							1.95479
							-2.58841
							-4.78331
							-4.3331
							-4.18718
							-1.86417
							-5.46753
							-4.92755
							-3.18462
							-4.02855
							-3.8433
							-4.38155
							-1.97108
							-3.43973
							-2.41555
							2.24951
							-4.14691
							-3.84104
							-1.867
							4.28131
							-6.72084
							-5.07623
							-6.82944
							-2.64516
							-6.99005
							-6.07918
							-1.94683
							-6.61333
							-3.59286
							3.75244
							3.33865
							-4.30789
							-4.31629
							-2.00731
							-3.82928
							-4.40422
							2.62994
							-1.84226
							4.24719
							-1.92656
							-2.38341
							3.15098
							-6.48096
							-3.76506
							4.12541
							-3.99996
							-3.72523
							-5.77346
							3.5622
							-2.75876
							3.98558
							-3.97474
							-6.30749
							-4.09272
							-4.15235
							-4.32476
							1.92282
							-4.06762
							-5.44877
							-4.08494
							4.31554
							2.98379
							-2.50892
							-3.97937
							-3.88167
							-2.24617
							-2.9672
							4.29171
							-6.63309
							-4.23006
							-3.77877
							2.40695
							-6.1498
							-1.93139
							-2.2294
							-1.99139
							-6.91764
							-3.6797
							-3.20317
							4.25118
							-4.33326
							-3.77442
							-1.73336
							-3.44636
							-4.25725
							3.90741
							-3.99749
							-1.79682
							3.72021
							-4.50128
							-6.43157
							-1.70735
							-1.89216
							-5.99694
							-5.59908
							3.39866
							-2.31627
							-4.12388
							-5.09425
							-4.5637
							4.14382
							4.32828
							-5.41216
							3.57039
							-6.20385
							-1.7333
							2.89641
							1.86756
							2.14007
							-3.89481
							-2.25717
							-3.7898
							-3.13728
							4.34093
							-3.70864
							-6.57115
							4.29233
							-3.72584
							2.50063
							-4.35624
							-5.81745
							-3.90997
							-1.93485
							-4.40631
							-3.89617
							-4.4461
							4.27631
							-3.71236
							-1.45998
							-3.86909
							-6.83224
							-3.78613
							-3.90948
							-4.02445
							-2.04228
							-3.43855
							-1.84909
							-6.35189
							-1.50352
							-3.68337
							-2.17943
							-2.28883
							3.21556
							-6.09631
							-3.33249
							-2.87816
							2.80278
							-2.31309
							-4.06447
							-5.38412
							-2.97418
							1.76382
							-3.05647
							-3.51684
							3.80643
							4.35574
							-5.59181
							-1.45235
							-1.62811
							-4.03834
							-4.52659
							-1.32766
							2.05495
							-4.90518
							2.57625
							4.14378
							4.32663
							4.21323
							-1.87241
							-1.2058
							-3.3022
							3.05772
							-4.49861
							3.42905
							-3.6984
							4.38406
							-4.29399
							-2.83045
							-2.26277
							3.58855
							-4.06797
							-3.61146
							-3.99295
							-3.81919
							-6.28659
							-1.67771
							-3.85283
							-1.56606
							-6.96964
							-1.92648
							-6.80573
							-3.62573
							-6.57124
							-2.60562
							-6.01398
							-5.51865
							-2.00114
							4.266
							-1.36993
							-2.1148
							1.72907
							-2.4904
							-4.37363
							-2.42595
							2.55494
							2.09491
							-3.59768
							2.64284
							3.40813
							4.3651
							-3.63511
							-1.05012
							-0.985478
							2.19675
							-4.19109
							-1.03117
							-1.54075
							4.15289
							-3.90554
							-2.80249
							-3.73604
							3.78035
							-1.64359
							3.58312
							-3.40881
							2.84171
							-3.95912
							4.30817
							-2.84937
							-4.40834
							-2.37154
							3.04312
							4.04478
							1.96367
							-6.58004
							4.35364
							-1.42907
							4.24067
							-1.2158
							-3.74091
							2.87925
							-6.27864
							-3.66686
							2.56815
							-7.21774
							-3.82626
							-3.18508
							-0.825932
							2.62901
							-4.0513
							3.28005
							-0.85362
							-0.80381
							2.9509
							-1.59022
							-5.52408
							-1.04125
							-2.84667
							-1.5693
							-3.5571
							4.08773
							-1.33173
							1.67088
							-4.88429
							-4.29009
							-3.76636
							-1.4728
							3.5686
							-5.97923
							-6.21542
							-3.82875
							-2.91237
							-2.9258
							1.91349
							4.35202
							-3.56173
							-3.75235
							2.20326
							2.06191
							-3.59683
							2.7472
							2.56586
							-3.63628
							-1.19098
							-2.22464
							-7.05016
							-0.689134
							3.82486
							3.99922
							-1.49054
							-3.77407
							3.26196
							-3.59797
							-2.96629
							4.31128
							-6.33034
							4.23306
							-3.23939
							-0.631645
							-1.00172
							-3.15129
							3.48363
							-0.66387
							4.13953
							4.21694
							4.29824
							2.96242
							-0.573271
							-1.2901
							-6.15357
							-6.75162
							4.00828
							-3.52814
							2.27639
							2.48396
							-3.81935
							-7.45982
							1.75604
							-3.72505
							-3.95972
							3.80124
							-0.798907
							-5.49085
							-3.29556
							-1.18234
							-1.42883
							-2.10565
							-6.29371
							-3.51968
							-3.78149
							-0.818731
							-2.95796
							2.39457
							-3.39893
							4.33997
							-3.76736
							-3.18448
							-0.811856
							-0.721522
							3.50551
							-3.90295
							-5.52118
							-2.67265
							-4.40605
							-1.68112
							-3.63864
							2.3053
							-6.47114
							-4.82109
							-0.642366
							4.31045
							2.86051
							-2.14412
							4.32969
							-6.01097
							-1.18865
							-2.13945
							2.2239
							-0.613254
							-3.6969
							4.19049
							4.23685
							-0.832083
							-3.67306
							3.87035
							4.07963
							-7.16739
							2.62596
							-7.49708
							3.16277
							4.04419
							-3.56823
							-3.37014
							-1.48921
							4.16263
							-3.24182
							1.83653
							-6.83939
							-3.85175
							4.33005
							-1.22617
							-0.95501
							-1.10572
							-7.65013
							-3.63942
							-2.05273
							-3.53615
							-2.8711
							-4.18676
							-5.80695
							3.53686
							-1.42906
							-3.27029
							-2.88758
							6.55466
							-5.54777
							4.32854
							-2.06409
							-4.15671
							2.2375
							-0.990653
							-4.45869
							-3.2016
							-3.8483
							4.29135
							-2.66015
							-3.78545
							-1.50821
							-1.4862
							-1.01274
							2.59726
							-7.61247
							3.91787
							-4.83086
							3.16637
							-1.18199
							-5.8351
							4.24998
							4.18056
							-3.59792
							4.07368
							4.30738
							2.8133
							4.23298
							4.08192
							2.89502
							-6.26875
							-2.0503
							-3.44576
							2.18592
							-4.0221
							-1.87335
							-6.91302
							-1.4407
							3.43177
							-3.08479
							-3.87469
							-3.90533
							-2.63994
							-1.17598
							-3.54767
							-2.04074
							-3.82274
							-1.84101
							-3.44092
							4.1325
							-3.25132
							-5.57198
							-4.34877
							1.32384
							-4.24074
							-2.75391
							-7.39738
							4.03953
							4.25122
							-7.83687
							-5.53286
							-1.52361
							6.2293
							-1.85196
							-1.41263
							-1.75188
							-2.86981
							3.27085
							-5.37449
							-4.92339
							-5.3622
							-1.53184
							2.90333
							-3.59493
							4.03159
							4.23934
							-3.69615
							-4.52254
							-4.24587
							4.08564
							2.2795
							4.17628
							-2.47673
							-5.80059
							-3.59454
							-6.10075
							-2.60928
							-1.80215
							3.74226
							4.1928
							2.74718
							-2.24332
							-6.07193
							4.15251
							3.70405
							3.93164
							4.12036
							-3.06943
							-4.0743
							-1.67078
							-6.956
							-3.74788
							-3.63207
							3.90114
							4.0425
							-3.8808
							-4.41456
							-4.55672
							-3.75114
							3.4946
							-1.79653
							-3.9282
							-1.01299
							4.0958
							-3.27461
							-2.25374
							-5.4087
							3.13798
							-2.49322
							-3.8442
							-3.81333
							-7.54873
							-2.04836
							-5.74038
							-2.15452
							-4.78351
							-4.86121
							2.62716
							-5.36679
							-3.32688
							2.84985
							4.03843
							-7.76341
							-3.35515
							3.96568
							4.10427
							-6.28866
							3.06714
							-5.32665
							-7.62249
							4.09191
							4.07524
							-2.81636
							-4.86591
							-7.5516
							4.02227
							-3.63676
							-5.85455
							-4.5125
							-7.50561
							8.09932
							4.04013
							-1.95944
							-2.02261
							4.04495
							3.32101
							3.96198
							2.5401
							-4.62136
							-3.38544
							-2.21068
							-3.7375
							-3.73171
							-3.68148
							-2.09693
							4.45405
							-3.93837
							4.07512
							-7.26826
							3.6806
							-3.8209
							-3.55271
							3.96532
							-4.54605
							-4.04452
							-3.92973
							-3.77572
							3.17254
							3.96036
							-5.30073
							-3.59881
							-4.81626
							-6.68755
							2.90166
							-2.35029
							-4.47104
							-4.69026
							-4.1463
							-4.08882
							-4.82846
							-4.99814
							-3.57586
							-3.52879
							-5.12689
							-5.17255
							-5.1934
							-5.15398
							-2.95713
							-5.08667
							-2.85273
							3.87773
							3.88254
							3.87479
							3.91521
							3.91559
							5.02617
							3.86442
							3.93572
							3.93551
							3.84968
							3.94486
							3.94767
							3.99551
							3.80955
							-2.49852
							4.01073
							-4.82704
							-3.78805
							4.00759
							-3.7656
							-11.4806
							-10.1312
							-11.3623
							3.98916
							-2.32912
							3.97049
							-4.51721
							-3.72537
							-3.72026
							-8.48748
							-4.11526
							3.88615
							-9.57993
							3.8275
							-4.01655
							-2.24295
							-3.85366
							-3.66032
							-3.99957
							-3.64782
							-4.10755
							-4.20089
							3.67635
							-4.07669
							-3.60745
							3.47636
							-2.1564
							-5.93566
							-3.58724
							3.25969
							-3.55938
							-2.19646
							-5.677
							3.06647
							-2.25215
							-3.50302
							-2.26194
							2.99486
							2.93108
							2.86812
							2.41047
							2.47863
							2.7811
							2.74837
							2.59851
							-3.64463
							-4.3126
							-5.41796
							-4.92813
							-1.97479
							-2.10692
							-5.7669
							-4.80006
							-2.73289
							4.56436
							-3.32073
							-4.55719
							3.1956
							3.72486
							-4.44337
							-4.65747
							-4.69509
							-5.38548
							-5.36332
							-5.32757
							-5.23902
							-5.71231
							-6.03785
							-6.1594
							-6.41655
							-6.56825
							-6.75583
							-6.95957
							-7.11514
							-7.41324
							-7.54033
							-7.56356
							-3.05805
							2.83148
							-6.65995
							-5.34182
							-5.02066
							-5.40322
							3.79387
							3.0693
							-5.29921
							-4.66279
							-11.1498
							-5.21602
							3.79256
							-3.50049
							-3.71468
							3.51169
							-7.16175
							4.13918
							-4.4718
							-4.88992
							-2.29439
							-3.57721
							-3.64821
							-4.35833
							-2.56237
							-4.2016
							-4.99087
							2.66757
							3.7995
							3.23154
							3.86115
							-2.40147
							-2.23626
							3.8198
							-4.93695
							-10.2318
							-4.89366
							-5.90004
							-3.58387
							3.78956
							-7.36069
							-5.84802
							-3.70089
							3.79051
							3.87341
							-11.4319
							-5.42923
							2.98238
							-6.3919
							3.89564
							3.73751
							-6.26149
							-7.46545
							3.76045
							2.8102
							-3.2378
							-5.56755
							2.69639
							-10.6088
							-5.06265
							-2.96116
							-4.87275
							2.40777
							-7.31388
							-3.63308
							-5.28653
							-5.04024
							3.07268
							-5.55497
							2.59938
							-4.81673
							3.71389
							2.26819
							-6.01497
							2.24175
							3.26538
							-3.58142
							-11.6123
							-5.11608
							-12.5827
							5.31018
							3.64393
							-10.4005
							-3.49665
							-6.93369
							-2.39458
							-5.53662
							-4.5465
							3.77666
							-3.67586
							-4.52422
							3.70401
							-6.34639
							-3.70782
							2.78386
							3.66488
							3.38228
							-2.91944
							-4.31972
							-5.3561
							-3.41883
							-5.88866
							-2.97841
							3.64286
							2.57963
							3.65608
							-5.77201
							-5.13519
							-3.53114
							3.60495
							3.6591
							-3.43529
							2.92126
							-2.64678
							-11.397
							-14.6672
							-5.3792
							3.03569
							-7.68462
							-3.23459
							-2.20224
							2.38785
							-4.69839
							2.15855
							-5.74217
							-7.36697
							3.645
							3.56646
							-7.19777
							-4.89859
							-5.40133
							-1.62914
							-5.23801
							-5.7295
							-5.3495
							3.56552
							-5.03356
							-4.78393
							-3.48791
							-4.0367
							-14.9889
							-2.37719
[truncated: 1,603 more rows]

## Sheet: Blad9
	mean	std	95low	95up	surface		face	forehead	nose	cheeks	upper lip	chin
face	-1.90246	4.04295	-7.13826	4.79042	13979		-3.50042	-3.5199	3.74518	3.94687	-4.70395	-6.78596
forehead	1.4921	2.57569	-2.76449	4.68961	3254		-3.40991	-3.44394	3.85001	3.58391	-4.65244	-7.05443
nose	-3.11684	3.12078	-6.18602	4.51817	696		-3.36773	-3.17316	3.5844	4.32248	-4.78167	-7.33255
cheeks	-2.32575	3.67591	-5.99791	6.1771	3833		3.84148	-3.17392	4.35896	3.22754	-4.65395	-6.50132
upper lip	-5.70299	3.83385	-13.5485	-3.29225	503		3.30206	-3.35703	3.51822	4.67264	-4.75239	-6.24796
chin	-6.53611	0.787487	-8.08352	-5.46493	599		-3.37477	-2.849	4.71579	4.09257	-4.46969	-5.99333
							3.36413	-3.28604	4.31178	5.04643	-4.62515	-7.04206
							3.51941	-2.87081	3.39342	3.76427	-4.56693	-5.8
							4.09932	-3.21746	4.49621	3.39725	-4.56525	-7.63771
							-3.43362	-2.54265	4.10651	2.87312	-4.48763	-6.59737
							3.19259	-2.97691	5.05496	4.84551	-4.48901	-5.67928
							3.73834	-3.15044	3.23745	4.34824	-4.19803	-6.17666
							3.18935	-2.53395	3.72648	5.38469	-4.29491	-7.29298
							3.28446	-2.8596	-4.42513	3.94671	-4.36425	-5.64071
							4.02695	-2.64664	4.94167	5.24557	-4.41955	-7.99653
							4.37029	-3.08891	3.00201	4.63275	-4.35518	-6.82322
							4.28265	-2.27324	-4.94122	3.55963	-3.9048	-6.08383
							3.55799	-2.8402	3.61422	3.00282	-4.25338	-5.76756
							-3.42487	-2.55738	5.41897	4.25341	-4.44961	-6.70106
							-3.21089	-3.02037	-5.23614	5.74962	-4.33489	-8.39539
							3.30473	-2.61715	5.4492	-2.76539	-4.35123	-8.07305
							3.77432	-2.32478	4.39707	4.99496	3.74518	-7.57429
							4.54933	-2.17419	5.07363	-2.5457	-3.84678	-6.22644
							4.33214	-2.08255	-2.64798	5.69952	-4.1487	-5.92223
							4.67491	-2.29543	-3.45391	4.64344	-4.26758	-7.40719
							2.96542	-2.44352	-4.35812	3.84731	-4.37805	-6.72979
							-2.99382	-2.94467	-4.02056	3.12117	-4.3658	-8.75201
							4.08972	-2.54253	-5.64653	5.46657	4.35896	-6.1517
							3.03419	-2.18422	-5.60115	6.14483	-4.06767	-6.05717
							3.44844	-2.09407	-5.11125	3.46494	-4.10593	-6.32506
							4.64829	-2.15589	-2.20497	-2.79978	4.49621	-7.99582
							-3.4372	-2.02758	-4.6275	5.81559	-4.22393	-6.6425
							3.94687	-2.22653	-5.63036	4.77668	-4.51404	-6.16032
							4.95505	-2.85974	-4.54557	4.33265	-4.10327	-7.28752
							3.58391	-1.96351	-2.73905	5.24397	-4.4867	-8.84311
							-3.13795	-1.9699	-4.01513	6.17912	-4.15019	-6.36077
							4.32248	-1.86569	5.81599	-2.59009	-4.42513	-6.3732
							5.112	-1.86116	-1.96519	6.52753	-4.47156	-6.73726
							-2.90725	-1.87159	-4.2496	5.71185	-4.20518	-6.15279
							2.97608	-2.07784	-3.52403	3.57861	-4.75988	-7.61863
							-2.69619	-1.92277	-5.19716	6.12098	-4.84	-8.28253
							4.94263	2.7998	-5.22809	5.10415	-4.35812	-7.11838
							3.22754	-2.51647	-5.97866	-2.27325	-4.43268	-8.70991
							4.67264	-1.82189	-5.78254	-2.85742	-4.76936	-6.31905
							-2.74857	-2.24516	-2.35535	4.00605	-4.28813	-6.5781
							5.24565	-1.779	-2.06441	6.43906	-5.26727	-6.27462
							-2.96546	-1.86954	-2.9916	4.48315	-4.66515	-6.40673
							4.09257	-1.80662	-4.62405	-3.06289	-5.24231	-7.05301
							-2.65291	-1.71088	-3.9488	6.70027	-4.2496	-6.52282
							5.23921	-1.99417	-2.43946	5.61085	-4.92722	-7.56591
							-3.47343	-1.78199	-5.55681	6.8846	-4.63432	-8.59978
							5.43885	-1.69091	-2.56515	5.08737	-5.76847	-6.37329
							5.04643	2.74833	-5.05098	6.05299	-4.47709	-6.7344
							3.76427	-1.56236	-5.01974	-2.35195	-5.07523	-6.21772
							5.49615	-1.58249	-4.47709	-3.27288	-5.38583	-6.15469
							5.59862	-1.58037	-6.03549	-2.51204	-5.84679	-6.8102
							3.39725	-1.82452	-3.36121	4.60967	-4.56905	-6.38422
							2.87312	2.39935	5.51939	-3.73553	-8.91074	-7.71648
							-2.52795	-1.51021	-2.38926	6.97085	-4.70945	-6.68891
							-2.6788	-1.73075	-5.92306	4.23077	-7.70388	-8.37738
							4.84551	-1.89984	-2.43628	6.7692	-5.09407	-6.08177
							4.34824	-2.0974	-6.148	5.41582	-5.39175	-6.98882
							5.74028	-1.74239	-2.30378	6.4463	13.5529	-7.83742
							-2.9127	-1.61612	-4.28373	5.84926	6.7486	-6.05086
							5.38469	2.72466	-2.63585	7.25805	-13.2411	-7.20964
							5.57414	-1.52116	-2.65075	-3.00703	-11.1991	-6.42235
							-3.17105	-1.52403	-5.0625	-2.09027	-8.90446	-6.27711
							-2.5898	-1.38471	-2.73014	7.16523	-4.79636	-7.1315
							3.94671	2.46841	-2.56208	6.23905	-5.64609	-6.94055
							-2.50896	-1.38032	-5.51638	4.77468	-5.55412	-6.88272
							-2.407	-1.58533	-3.65132	-2.17672	-4.8451	-6.6357
							5.24557	-1.81314	-4.70945	5.6268	-5.07982	-6.19216
							4.63275	-1.71089	-2.40009	-2.68512	-5.4548	-5.88952
							3.55963	-1.86454	5.56222	6.92452	-6.40464	-5.94852
							3.00282	-1.38089	-6.26601	5.13336	-6.10407	-5.98402
							-2.4263	2.15435	-5.92187	4.36672	-14.9181	-6.11867
							-3.49901	-1.29691	-6.07051	-2.44697	-5.11329	-6.30244
							5.96018	2.73808	-2.72357	7.46436	-17.4604	-6.57045
							4.25341	-1.52001	-5.9405	6.71364	-6.59786	-6.74521
							6.06299	1.67787	-6.15348	-3.28329	-14.5338	-7.3889
							5.74962	-1.34044	-5.71666	7.61151	-11.8965	-7.71037
							-2.76539	2.50761	-5.65054	-3.67173	-8.36521	-7.98642
							4.99496	-1.6405	-6.25892	6.05549	-4.44223	-6.15295
							5.97671	-1.81889	-6.32083	4.82737	-14.9208	-6.54832
							-2.5457	-1.25932	-5.22606	7.40126	-8.38926	-6.7582
							-3.2011	1.957	-5.14212	7.1664	-13.392	-6.09983
							-2.34311	-1.45117	-6.30925	-2.93706	-3.29765	-7.19902
							-2.62704	2.30786	-6.3067	5.36776	-14.2144	-7.2259
							5.69952	1.78259	-6.26976	6.48402	-10.0048	-5.97203
							6.21558	-1.28828	-6.17483	-2.27908	-13.7813	-7.61256
							4.64344	-1.44887	-4.41459	6.90561	-8.37175	-6.94219
							6.2408	2.78648	-6.06102	5.80948	-13.6007	-6.83394
							3.84731	-1.76501	-4.24428	7.74316	-11.2197	-6.64401
							-2.37406	-1.55538	-5.93997	-4.22027	-3.73949	-6.28494
							3.12117	2.6483	-3.66196	-2.70472	-13.3783	-6.09808
							5.46657	-1.33471	-5.63737	-2.47079	-13.3537	-6.30075
							6.14483	-1.61905	-3.30141	7.8955	-8.63856	-7.138
							3.46494	-1.68821	-5.24637	6.17508	-10.4788	-6.76321
							-2.74081	-1.30268	-4.79636	-2.09937	-3.88759	-7.14217
							-3.51619	-1.89635	-2.99571	-4.98616	-7.40844	-6.39829
							-2.34568	1.85346	-2.54071	-3.05436	-7.23029	-7.08412
							-2.20533	-1.77987	-2.42049	-2.01288	-5.08915	-6.21636
							-2.79978	2.43625	-2.38505	7.54166	-7.52145	-6.10627
							5.81559	2.87054	-2.39371	7.8672	-6.37753	-6.31494
							4.77668	2.05333	-2.74178	-3.30469	-3.63093	-7.04321
							4.33265	-1.34275	-2.44452	-3.64921	-6.07557	-6.87227
							5.24397	-1.48906	-2.46892	-4.51834	-5.87085	-6.70706
							6.53605	-1.42285	-2.62387	5.44503	-3.29045	-6.07974
							6.17912	2.73586	-2.5925	7.35597	-6.42601	-6.28095
							6.49478	1.68076	-2.49251	6.98453	-6.0462	-6.0017
							-2.87679	-1.35501	-2.70137	6.52364	-5.73788	-6.49687
							-2.59009	2.28891	-6.1826	5.90131	-5.6767	-5.86455
							-2.17083	-1.68442	-5.71338	8.12306	-4.85898	-6.06668
							6.52753	-1.9634	-6.2335	-3.87819	-3.13418	-6.77503
							-3.22621	-1.4809	-5.43827	8.10078	-6.1606	-6.35278
							5.71185	-1.54682	-2.38013	-2.50961	-5.3134	-5.66717
							3.57861	1.84995	-5.11329	-5.35733	-5.90037	-6.50392
							6.12098	2.95575	-3.46268	7.05753	-5.56894	-5.77362
							5.10415	2.60216	-5.3966	7.88952	-3.77212	-5.71161
							-2.27325	-1.83078	-2.46221	6.20507	-5.42902	-6.14425
							-2.85742	-1.41719	-2.61661	7.48094	-5.421	-6.58433
							4.00605	2.06603	-4.82416	-2.13511	-5.87288	-6.65156
							6.75281	1.71356	-2.63037	6.65646	-5.16194	-6.3748
							-2.17144	-1.41125	-2.50889	-2.80731	-5.55842	-5.6349
							-3.53153	2.8686	-3.97313	-4.8258	-5.88917	-5.48562
							6.86737	-1.51251	-2.27666	-2.3301	-6.01672	-6.42393
							-2.33382	-1.67156	-6.1205	-3.26972	-5.66648	-5.91952
							6.43906	2.6164	-2.42408	-2.02711	-5.31907	-5.47027
							4.48315	2.272	-5.77619	8.30609	-5.42802	-5.81108
							-3.06289	3.06163	-2.35244	8.2844	-5.85853	-6.3256
							6.70027	1.66283	-5.70721	8.18606	-5.41553	-5.52712
							-2.08048	-1.52754	-2.96969	-3.53894	-5.9885	-6.07885
							5.61085	2.99911	-6.21676	-5.75648	-5.41118	-5.63527
							6.8846	2.53449	-4.44223	8.02508	-5.76863	-5.46497
							-2.54486	-1.95228	-4.84153	-2.21738	-5.48314	-6.21097
							5.08737	2.83473	-4.74935	-3.91628		-5.68231
							-2.8461	2.01143	-2.58767	6.44726		-5.5412
							6.82394	-1.55023	-5.35445	7.22044		-5.46862
							6.05299	-1.78438	-2.54344	6.90171		-5.6226
							-2.35195	-1.64445	-3.4725	-4.95991		-5.3881
							-2.14744	1.84844	-4.27675	7.66144		-6.03978
							-3.27288	2.7195	-2.48067	-4.45944		-5.42
							7.03071	-1.70485	-2.2475	8.35593		-5.54983
							-2.00794	2.3937	-2.19248	-5.33554		-5.33555
							7.12598	-1.66336	-5.80803	-2.67018		-5.27707
							-2.51204	3.19357	-6.14385	-2.43608		-5.18046
							4.60967	3.11742	-5.33591	8.44645		-5.79673
							-3.73553	2.03933	-5.08154	8.17907		-5.46429
							6.97085	-1.69861	-2.96555	7.44527		-5.21357
							4.23077	2.90334	-3.29765	-6.22518
							-3.5199	-1.87318	-2.01499	-6.68125
							-3.13942	-1.7301	-6.13311	-3.33402
							6.7692	2.27911	-3.50035	-5.81126
							5.41582	3.02788	-2.26631	-2.98318
							6.4463	2.70308	-4.30904	-2.12928
							5.84926	-1.81721	-6.00368	-3.68723
							7.25805	1.86691	-4.6141	-2.10587
							-2.15351	-1.77447	-2.05467	-7.13865
							-2.29998	2.59686	-5.36241	-4.71604
							-2.00486	3.32643	-5.93412	8.40043
							7.32434	2.01318	-6.24882	-2.29351
							-3.00703	2.23438	-3.59866	-5.12853
							-2.09027	2.87437	-3.73949	8.52725
							7.16523	-1.89439	-2.78403	8.13389
							6.23905	-1.83054	-2.22654	-2.81125
							7.43244	-1.86978	-5.63465	-4.08138
							-2.81305	2.43863	-4.41938	-5.4583
							4.77468	3.31577	-6.01957	-2.61064
							-3.44394	2.79386	-5.46382	-6.44284
							-3.17316	3.0807	-5.96706	-6.85131
							-2.17672	3.22897	-2.93337	-7.81236
							5.6268	-1.97671	-4.86915	-6.03446
							-2.68512	3.4706	-2.44284	-2.4046
							6.92452	2.71131	-5.33035	-3.30287
							5.13336	-1.95776	-3.88759	-4.34399
							4.36672	2.24835	-3.21165	8.52997
							7.13465	2.44416	-2.40845	-4.80752
							-2.0016	-2.03683	-5.03209	-5.25019
							-2.44697	3.15151	-3.87204	-2.25809
							7.46436	-2.02349	-3.63093	-7.05669
							6.71364	3.31483	-2.68667	-8.38568
							-2.51013	3.44744	-3.93242	-2.34393
							-3.28329	2.99564	-4.00231	-7.45892
							7.61151	2.23243	-3.08338	-3.75255
							7.35227	-2.15244	-3.29045	-2.19432
							-2.28193	3.63084	-3.26457	-3.02869
							-3.17392	2.70714	-3.37336	-6.16453
							-3.67173	-2.07347	-3.13418	-2.74865
							6.05549	-2.23061		-2.24692
							-3.35703	2.53012		-2.57093
							4.82737	3.58578		-4.04093
							7.40126	3.3222		-4.44196
							-2.849	-2.2111		-8.09358
							7.1664	3.21266		-6.81824
							-2.93706	3.0156		-5.66139
							7.73365	2.50046		-7.69376
							5.36776	3.5198		-8.47984
							6.48402	2.41487		-6.42305
							-2.27908	2.92088		-5.23114
							6.90561	3.14495		-2.49331
							5.80948	-2.36058		-3.67991
							7.74316	3.76664		-7.08455
							-3.28604	2.72325		-4.68917
							-2.08488	-2.2445		-7.41751
							-4.22027	3.74132		-6.04968
							7.70836	-2.36451		-3.27461
							-2.70472	-2.34487		-7.82755
							-2.47079	-2.46763		-2.29452
							7.8955	2.70047		-4.25694
							7.57449	3.45763		-8.35502
							6.17508	3.72091		-2.44531
							-2.09937	2.91695		-2.90846
							-2.87081	2.61436		-6.54777
							-3.21746	3.16856		-5.17961
							7.39854	3.88445		-8.06773
							-4.98616	3.35027		-2.39438
							-3.05436	2.57537		-2.68019
							-2.54265	-2.41767		-4.88504
							-2.01288	3.84609		-2.36635
							-2.97691	2.54739		-3.84577
							-1.96139	3.88216		-6.26097
							-1.96762	2.85072		-6.83985
							7.54166	3.09412		-5.77898
							7.8672	3.68983		-5.51998
							-1.97843	3.3248		-7.13448
							-3.30469	3.0333		-3.5537
							-3.64921	2.66533		-7.4667
							-4.51834	2.7696		-4.61475
							5.44503	2.86973		-8.13997
							-3.15044	3.22482		-6.02332
							7.35597	2.69649		-3.11378
							-2.13988	3.62481		-4.10606
							6.98453	2.62144		-7.74141
							6.52364	3.96736		-5.071
							5.90131	2.7149		-2.39837
							8.01656	3.94417		-2.89062
							-2.21671	3.86506		-6.46737
							-2.53395	-2.57444		-2.63006
							7.66564	3.14403		-4.37276
							-2.8596	2.98274		-3.31585
							8.12306	2.75624		-2.45991
							-2.64664	3.39282		-7.05559
							-3.08891	3.5161		-5.65726
							7.8916	2.76124		-7.91868
							-2.27324	3.84324		-4.73836
							-1.98875	3.66286		-3.53981
							-3.87819	4.03586		-3.88662
							8.10078	2.88388		-5.99609
							-2.50961	3.99096		-5.40028
							-5.35733	3.14318		-5.84416
							7.05753	2.77808		-2.81703
							7.88952	2.80211		-6.22191
							6.20507	2.71034		-6.65812
							7.48094	2.82208		-2.59834
							-2.13511	3.35707		-7.33878
							-2.8402	3.06411		-6.38289
							6.65646	4.04724		-7.62208
							-2.80731	3.6621		-2.98434
							-2.01168	3.81443		-2.49378
							-4.8258	2.8328		-2.56315
							-2.55738	3.53251		-4.60134
							7.57161	2.84964		-5.19989
							-3.02037	3.25039		-5.75178
							8.174	3.99977		-4.3206
							-2.61715	4.12873		-6.93456
							-2.3301	2.8778		-2.53318
							-3.26972	2.79029		-5.56458
							-2.32478	3.15845		-3.66523
							-1.98135	2.98126		-7.31202
							-2.02711	4.1398		-6.15863
							8.30609	2.88513		-5.83325
							8.2844	2.8638		-5.93209
							8.18606	2.92198		-2.98128
							-3.53894	3.89997		-3.28931
							-5.75648	3.37707		-2.81666
							-2.17419	4.10455		-5.03171
							-2.08255	3.73196		-4.1243
							8.02508	4.23085		-4.57863
							-1.9936	2.82338		-3.12796
							-2.29543	4.06058		-5.38123
							-2.21738	3.49458		-2.63664
							-2.02458	2.8825		-4.78678
							-3.91628	2.87259		-6.60529
							7.87394	4.22341		-7.00565
							6.44726	2.87832		-2.56545
							7.22044	3.22016		-6.2258
							-2.44352	2.90033		-5.97103
							-2.94467	3.06201		-5.72502
							6.90171	4.17614		-5.80328
							-1.97441	2.85141		-4.41476
							-4.95991	2.95916		-2.74878
							8.14053	3.96057		-2.60204
							7.66144	3.85782		-3.05785
							-4.45944	3.38257		-6.71166
							8.35593	2.91766		-5.57378
							-2.54253	4.29951		-4.17681
							-5.33554	3.53727		-3.39388
							-2.18422	3.68504		-3.90916
							-2.67018	4.09837		-3.25331
							-2.09407	2.81041		-2.8774
							8.3066	3.11195		-6.27499
							-1.95909	4.24267		-4.91413
							-2.43608	2.87732		-3.68404
							8.44645	2.82721		-5.18076
							-2.15589	-2.84514		-2.67962
							-2.02758	2.95695		-4.64689
							8.17907	3.19258		-6.43659
							-1.96682	-2.81032		-5.8275
							-7.64352	2.88359		-5.60929
							-2.22653	3.98874		-5.9812
							7.44527	3.34455		-4.42314
							-2.85974	4.16301		-2.63607
							-6.22518	3.51937		-5.70942
							-6.68125	2.7754		-3.59224
							-1.96351	4.30365		-4.17301
							-1.9699	3.00825		-5.49736
							-3.33402	4.24485		-2.64976
							-5.81126	4.07417		-3.32052
							-2.98318	3.86644		-5.6436
							-8.1963	2.84507		-4.97009
							-2.12928	2.8196		-2.85149
							-2.04579	2.7481		-2.6841
							-8.01195	3.17702		-5.99973
							-3.68723	-2.74063		-3.01614
							-2.10587	2.82333		-6.19102
							-7.13865	3.32478		-4.8129
							-4.71604	3.59171		-3.92711
							8.40043	-2.81628		-5.69063
							-2.29351	-2.77264		-5.8102
							-5.12853	3.0118		-5.27136
							-1.99819	-2.7339		-4.64075
							8.52725	3.77173		-4.46603
							-1.86569	4.01634		-2.74847
							-1.86116	4.27832		-3.4677
							-1.87159	4.15878		-3.6824
							8.13389	3.43425		-5.49148
							-2.81125	4.20721		-5.66416
							-2.07784	-2.69262		-2.69856
							-1.96493	-2.75747		-5.96691
							-2.10216	3.06647		-5.11833
							-4.08138	3.59434		-2.7094
							-5.4583	-2.65018		-3.24033
							8.4707	-2.69434		-5.77325
							-1.92277	3.8285		-5.01454
							2.7998	3.23171		-4.25429
							-2.61064	-2.75461		-5.4741
							-6.44284	2.63372		-4.88369
							-2.51647	2.81647		-4.68483
							-6.85131	2.66882		-5.38705
							-1.82189	4.01972		-5.54709
							-7.81236	4.26338		-2.73836
							-2.24516	-2.63566		-2.85533
							-1.779	-2.74959		-3.98862
							-6.03446	-2.70778		-5.47066
							-1.86954	4.0789		-4.52453
							-8.3343	3.61152		-5.77842
							-2.4046	-2.67472		-5.58559
							-3.30287	3.86639		-3.38518
							-8.10368	2.91624		-2.75777
							-1.91533	4.1538		-4.78411
							-4.34399	-2.5772		-3.64878
							-7.63473	-2.55746		-2.73484
							8.54933	-2.50501		-3.07531
							-1.80662	-2.7163		-5.194
							-1.71088	3.96995		-5.03767
							-1.99417	2.56012		-4.46989
							-8.52997	3.27888		-4.91525
							-4.80752	-2.69273		-2.74
							-5.25019	3.44825		-5.38967
							-2.25809	-2.48469		-5.34662
							-1.78199	3.03478		-5.6256
							-7.05669	-2.66339		-4.69438
							-8.38568	3.61727		-5.41668
							-7.8148	-2.52176		-4.31717
							-2.34393	4.25974		-2.74802
							-2.09055	3.85675		-2.77803
							8.55396	-2.56084		-3.98097
							-7.45892	-2.45338		-2.77928
							-3.75255	2.58358		-3.21715
							-2.19432	-2.67615		-5.02143
							-1.69091	3.64538		-5.48477
							-3.02869	4.12581		-5.11691
							2.74833	-2.39067		-3.56647
							-6.16453	2.87016		-5.28567
							-1.56236	-2.62905		-2.93751
							-8.26333	2.40214		-5.30764
							-2.74865	-2.31432		-4.91964
							-1.58249	-2.36268		-2.68532
							-2.24692	3.04437		-5.29246
							-2.15656	-2.56093		-5.31604
							-2.57093	-2.41498		-5.26682
							-1.89447	-2.58174		-2.74396
							-8.03799	-2.68618		-4.50854
							-4.04093	3.37401		-5.34957
							-4.44196	3.97572		-4.73089
							-8.09358	3.17585		-5.10717
							-1.58037	4.26751		-5.05504
							-1.82452	2.63038		-5.20636
							2.39935	3.8352		-2.7068
							-6.81824	-2.68096		-2.99264
							-8.40955	2.36055		-3.32047
							-5.66139	-2.25698		-5.1776
							-1.94117	3.63366		-5.21024
							-1.51021	-2.51619		-2.6365
							-2.07391	-2.59019		-4.93108
							-1.73075	-2.71539		-4.15607
							-7.69376	2.72871		-2.71176
							-8.47984	2.93188		-5.22141
							-1.89984	4.06542		-5.21927
							-8.55583	-2.44109		-5.17613
							-2.0974	2.4008		-4.61821
							-1.74239	-2.24281		-4.41245
							-6.42305	3.10312		-5.12746
							-5.23114	-2.70069		-3.72421
							-2.49331	-2.69387		-5.17093
							-7.57665	3.42197		-5.06939
							-8.5084	4.31625		-5.23992
							-2.02289	-2.34236		-2.65722
							-1.61612	-2.49284		-5.14721
							-3.67991	2.46163		-5.00657
							2.72466	-2.75047		-2.63796
							-7.08455	-2.71731		-5.08893
							-4.68917	3.93892		-5.22732
							-1.52116	2.94412		-3.40515
							-7.41751	-2.09845		-4.18435
							-1.52403	3.67859		-3.03388
							-6.04968	2.80009		-5.00042
							-2.14067	2.1917		-5.18494
							-3.27461	4.1779		-4.5317
							-1.38471	-2.64877		-4.84577
							-7.82541	2.09211		-5.00173
							-8.12307	-2.56515		-5.09617
							-7.82755	-2.13562		-4.87127
							-2.29452	3.09541		-5.23052
							2.46841	-2.34041		-3.70404
							-4.25694	4.47136		-2.54834
							-1.38032	-2.60177		-2.50903
							-1.58533	3.49408		-2.81585
							-1.81314	-2.71615		-4.70052
							-8.35502	2.49277		-4.84991
							-2.44531	-2.78481		-5.10205
							-2.90846	3.31809		-5.15323
							-6.54777	-2.65075		-4.97763
							-5.17961	2.20603		-4.15754
							-1.71089	2.73597		-4.88115
							-8.06773	-2.19901		-3.17047
							-2.39438	-2.76416		-5.03272
							-1.86454	-2.38109		-5.16268
							-1.38089	-1.95574		-5.17755
							-2.68019	2.02129		-4.91299
							-8.47111	3.72995		-2.45337
							-4.88504	-1.95181		-5.1448
							-2.00062	-2.02822		-3.54164
							2.15435	-2.79532		-4.62653
							-2.36635	-2.5538		-2.53746
							-3.84577	3.42066		-4.96417
							-6.26097	4.57831		-3.09682
							-6.83985	-2.7119		-4.85794
							-5.77898	3.13346		-5.07814
							-5.51998	4.07071		-5.19344
							-1.29691	2.27942		-4.31066
							-8.3986	-2.78226		-3.82374
							-7.13448	2.41986		-5.08525
							-7.52284	-2.72357		-2.35635
							-8.50563	2.07367		-5.15479
							2.73808	1.94082		-5.0062
							-1.52001	2.2297		-2.72067
							-2.10527	-1.85561		-3.32415
							-3.5537	-1.84934		-5.0518
							1.67787	2.41004		-2.28313
							-7.4667	-1.86568		-3.85361
							-8.13552	-1.88428		-5.19564
							-4.61475	2.53764		-4.45265
							-1.92432	-1.96373		-4.82778
							-7.83125	-2.00355		-5.09327
							-8.13997	-2.11794		-2.44879
							-6.02332	2.81538		-3.5574
							-2.07678	-2.17736		-5.02263
							-3.11378	2.94802		-4.10904
							-2.31798	-2.277		-5.1145
							-1.34044	3.06749		-2.82067
							-4.10606	-2.36214		-4.55089
							2.50761	-2.43296		-4.73821
							-1.6405	3.25159		-5.01247
							-7.74141	3.29654		-3.2613
							-5.071	-2.52554		-4.77021
							-2.39837	-2.58024		-3.70864
							-2.19668	3.52604		-4.49157
							-2.07165	3.57087		-4.05233
							-1.81889	-2.68924		-4.24976
							-1.25932	3.76848		-4.5
							-2.89062	-2.76197		-3.84159
							-8.38565	3.87587		-5.12007
							1.957	-2.77374		-3.23079
							-6.46737	3.99959		-5.44795
							-1.45117	-2.79305		-2.72183
							-2.63006	4.31198		-5.66211
							2.30786	-2.80512		-5.22764
							-8.40864	-2.7985		-4.71574
							-4.37276	-2.74178		-2.5046
							-3.31585	4.58999		-5.74574
							1.78259	-2.70137		-3.97744
							-2.45991	2.26986		-5.51722
							-7.05559	-2.74251		-2.95652
							-7.84071	2.11577		-2.32633
							-1.28828	4.2313		-5.76227
							-5.65726	3.03802		-4.88307
							-1.44887	-2.68371		-4.21694
							-7.91868	4.86375		-5.67851
							2.78648	3.37075		-3.28285
							-4.73836	-2.50297		-2.20391
							-1.76501	-2.72969		-5.66531
							-8.02045	-1.94674		-2.64612
							-3.53981	-1.8439		-2.37325
							-3.88662	3.78254		-5.40083
							-7.45456	1.86423		-5.70512
							-5.99609	1.81108		-2.25026
							-5.40028	-2.33873		-5.19018
							-5.84416	-2.74848		-2.95188
							-1.55538	-2.13723		-3.75175
							-2.81703	2.49963		-5.54883
							-2.10114	1.94339		-5.55107
							-8.19646	-2.63037		-4.68997
							-6.22191	3.19211		-2.42267
							-6.65812	-2.76546		-5.35722
							-8.37817	2.16952		-2.12845
							-8.13602	-2.73886		-4.277
							2.6483	3.44341		-2.68751
							-2.59834	-2.57951		-5.44458
							-7.33878	5.1184		-2.21327
							-1.33471	-2.29259		-5.32939
							-1.61905	2.84936		-5.30248
							-2.09572	-2.02311		-5.15377
							-8.35232	-2.58767		-5.34071
							-2.08877	1.81809		-2.35343
							-1.68821	-2.68768		-4.65128
							-6.38289	4.72581		-3.04998
							-2.02714	1.85957		-5.32424
							-7.62208	2.43892		-5.28619
							-2.98434	3.79034		-4.89196
							-1.30268	-1.88702		-5.27395
							-2.49378	2.61248		-4.19816
							-1.89635	4.29613		-2.10217
							-8.26002	-2.72653		-1.98664
							-8.00614	-2.81535		-2.10973
							-2.56315	2.03261		-2.64558
							1.85346	-2.50882		-5.10536
							-8.2426	-2.27553		-5.3069
							-4.60134	5.34321		-5.30922
							-5.19989	3.26507		-5.13618
							-1.77987	-2.79879		-4.29005
							-7.83594	-2.81069		-3.53758
							-5.75178	2.72658		-4.8689
							-4.3206	-2.04135		-5.288
							2.43625	1.94111		-2.10766
							-8.1013	-2.43627		-2.99667
							-2.12352	4.76608		-2.30012
							-6.93456	2.48536		-5.16927
							-2.53318	2.25343		-4.56659
							2.87054	-2.84974		-1.9695
							2.05333	-2.69452		-5.09488
							-5.56458	-2.76324		-5.19705
							-1.34275	3.66918		-1.88614
							-2.19745	1.95468		-4.8686
							-1.48906	1.91471		-5.18866
							-7.43421	-2.84815		-5.22028
							-1.42285	4.16564		-2.39202
							-3.66523	2.09011		-5.09045
							-7.31202	5.56042		-3.2716
							-6.15863	2.71862		-3.61655
							-7.64714	4.62901		-5.21934
							-2.38137	3.03098		-4.99986
							-5.83325	-2.90844		-5.25005
							-5.93209	-2.87993		-1.91959
							-2.98128	-2.27457		-2.85303
							-3.28931	-2.63425		-4.13976
							-2.03571	2.5214		-1.73346
							-2.81666	-2.12421		-5.19882
							2.73586	-2.74112		-5.07914
							1.68076	2.00441		-2.10195
							-5.03171	-2.94284		-1.94178
							-2.15387	2.32187		-1.7746
							-4.1243	-2.80504		-5.08137
							-1.35501	5.1879		-4.38237
							-7.868	3.51213		-4.67359
							-2.04605	-2.86912		-3.6906
							-4.57863	2.04542		-5.21095
							-8.02592	-2.87787		-3.25729
							-3.12796	-2.54331		-1.90256
							-8.20977	4.06546		-5.09643
							-5.38123	5.73651		-5.14764
							-2.57244	-2.94083		-5.06775
							-2.63664	3.3712		-1.75896
							-4.78678	-2.99027		-3.99405
							2.28891	2.49959		-5.10916
							-6.60529	2.13203		-1.81482
							-7.00565	3.04724		-5.08474
							-7.84503	-2.86241		-2.15815
							-1.68442	2.79222		-4.75994
							-2.56545	2.10881		-5.02871
							-6.2258	4.45499		-4.35062
							-5.97103	-2.96647		-1.97965
							-2.20805	-2.28803		-1.93735
							-1.9634	-2.4409		-2.46919
							-1.4809	2.99773		-1.71282
							-1.54682	5.26696		-1.79423
							1.84995	2.35729		-2.83984
							-5.72502	3.97678		-5.02622
							2.95575	-2.7306		-3.42571
							-8.08354	3.34942		-4.95365
							-7.45116	4.84161		-5.10311
							2.60216	3.03374		-5.09297
							-8.08223	-2.9481		-1.90486
							-5.80328	3.04448		-3.91187
							-1.83078	5.89047		-2.93464
							-4.41476	4.47885		-4.37171
							-1.41719	2.24139		-4.74347
							-2.74878	2.29819		-1.84008
							-7.41761	2.29918		-1.71564
							-2.60204	3.01911		-2.19657
							-7.90877	2.76493		-3.60991
							-3.05785	3.85782		-1.86725
							-6.71166	-2.64026		-2.03857
							-5.57378	-2.45918		-4.9804
							-4.17681	3.37062		-5.01101
							-2.21034	2.57719		-2.95416
							2.06603	-2.81145		-5.11585
							-3.39388	3.06941		-2.41108
							-7.85168	5.34736		-1.702
							1.71356	3.0832		-1.80277
							-3.90916	4.9953		-5.06444
							-3.25331	6.01044		-4.68199
							-1.41125	4.37145		-3.31037
							-8.05964	3.78916		-3.63061
							-2.08369	-2.59905		-5.0445
							2.8686	2.56599		-2.66943
							-2.8774	-2.72587		-4.02733
							-6.27499	-2.97871		-5.03782
							-4.91413	3.42407		-1.92808
							-3.68404	2.94627		-1.90637
							-1.51251	2.41703		-4.40518
							-5.18076	3.06546		-5.01569
							-2.67962	2.79164		-1.83657
							-1.67156	2.48754		-5.00997
							-2.62537	3.02665		-4.73299
							2.6164	-2.85997		-2.17321
							-2.05551	4.05946		-2.0703
							-4.64689	4.67755		-1.74066
							2.272	5.49832		-2.92345
							-6.43659	2.62779		-3.28817
							-5.8275	6.07114		-4.40929
							-7.95684	3.03975		-4.99513
							-7.62367	3.34362		-5.02935
							-7.47627	5.06574		-2.31534
[truncated: 2,948 more rows]

## Sheet: Blad10
	mean	std	95low	95up	surface		face	forehead	nose	cheeks	upper lip	chin
[truncated: 3,602 more rows]

[truncated: 51 more sheets: Blad11, Blad12, Blad14, Blad15, Blad16, Blad18, Blad19, Blad20, Blad21, Blad22, Blad24, Blad25, Blad26, Blad27, Blad28, Blad29, Blad31, Blad32, Blad33, Blad35 …]
